# Supplementary material for: WHISPER or SHOUT study: protocol of a cluster-randomised controlled trial assessing mHealth sexual reproductive health and nutrition interventions among female sex workers in Mombasa, Kenya
Source: PubMed Central journal article supplement — BMJ Open. 2017 Aug 18;7(8):e017388. doi: 10.1136/bmjopen-2017-017388 (PMC5724193; doi:10.1136/bmjopen-2017-017388), 2017-08-18
Supplement: bmjopen-2017-017388.draft_revisions.pdf [file bmjopen-2017-017388.draft_revisions.pdf]

# BMJ Open

BMJ Open is committed to open peer review. As part of this commitment we make the peer review history of every article we publish publicly available.

When an article is published we post the peer reviewers' comments and the authors' responses online. We also post the versions of the paper that were used during peer review. These are the versions that the peer review comments apply to.

The versions of the paper that follow are the versions that were submitted during the peer review process. They are not the versions of record or the final published versions. They should not be cited or distributed as the published version of this manuscript.

BMJ Open is an open access journal and the full, final, typeset and author-corrected version of record of the manuscript is available on our site with no access controls, subscription charges or pay-per-view fees (<http://bmjopen.bmj.com>).

If you have any questions on BMJ Open's open peer review process please email [editorial.bmjopen@bmj.com](mailto:editorial.bmjopen@bmj.com)

# BMJ Open

## WHISPER or SHOUT study: Protocol of a cluster-randomised controlled trial assessing mHealth sexual reproductive health and nutrition interventions among female sex workers in Mombasa, Kenya

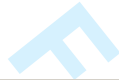

|                                 |                                                                                                                                                                                                                                                                                                                                                                                                                                                                                                                                                                                                                                                                                                                                                                                                                                                                                                                                                                                                                                                                                                                                           |
|---------------------------------|-------------------------------------------------------------------------------------------------------------------------------------------------------------------------------------------------------------------------------------------------------------------------------------------------------------------------------------------------------------------------------------------------------------------------------------------------------------------------------------------------------------------------------------------------------------------------------------------------------------------------------------------------------------------------------------------------------------------------------------------------------------------------------------------------------------------------------------------------------------------------------------------------------------------------------------------------------------------------------------------------------------------------------------------------------------------------------------------------------------------------------------------|
| Journal:                        | <i>BMJ Open</i>                                                                                                                                                                                                                                                                                                                                                                                                                                                                                                                                                                                                                                                                                                                                                                                                                                                                                                                                                                                                                                                                                                                           |
| Manuscript ID                   | bmjopen-2017-017388                                                                                                                                                                                                                                                                                                                                                                                                                                                                                                                                                                                                                                                                                                                                                                                                                                                                                                                                                                                                                                                                                                                       |
| Article Type:                   | Protocol                                                                                                                                                                                                                                                                                                                                                                                                                                                                                                                                                                                                                                                                                                                                                                                                                                                                                                                                                                                                                                                                                                                                  |
| Date Submitted by the Author:   | 20-Apr-2017                                                                                                                                                                                                                                                                                                                                                                                                                                                                                                                                                                                                                                                                                                                                                                                                                                                                                                                                                                                                                                                                                                                               |
| Complete List of Authors:       | Ampt, Frances; Burnet Institute; Monash University, Department of Epidemiology and Preventive Medicine<br>Mudogo, Collins; International Centre for Reproductive Health Kenya<br>Gichangi, Peter; International Centre for Reproductive Health Kenya; University of Nairobi<br>Lim, Megan; Burnet Institute; Monash University, Department of Epidemiology and Preventive Medicine<br>Manguro, Griffins; International Centre for Reproductive Health Kenya<br>Chersich, Matthew<br>Jaoko, Walter; University of Nairobi<br>Temmerman, Marleen; Aga Khan University - Kenya; International Centre for Reproductive Health<br>Laini, Marilyn; International Centre for Reproductive Health Kenya<br>Comrie-Thomson, Elizabeth; Burnet Institute; Monash University, Department of Epidemiology and Preventive Medicine<br>Stoové, MA; Burnet Institute,<br>Agius, Paul; Burnet Institute; Monash University, Department of Epidemiology and Preventive Medicine<br>Hellard, Margaret; Burnet Institute<br>L'Engle, Kelly; University of San Francisco<br>Luchters, Stanley; Burnet Institute; International Centre for Reproductive Health |
| <b>Primary Subject Heading</b>: | Global health                                                                                                                                                                                                                                                                                                                                                                                                                                                                                                                                                                                                                                                                                                                                                                                                                                                                                                                                                                                                                                                                                                                             |
| Secondary Subject Heading:      | Communication, Nutrition and metabolism, Obstetrics and gynaecology, Public health                                                                                                                                                                                                                                                                                                                                                                                                                                                                                                                                                                                                                                                                                                                                                                                                                                                                                                                                                                                                                                                        |
| Keywords:                       | Community gynaecology < GYNAECOLOGY, Anaemia < HAEMATOLOGY, International health services < HEALTH SERVICES ADMINISTRATION & MANAGEMENT, NUTRITION & DIETETICS, PUBLIC HEALTH                                                                                                                                                                                                                                                                                                                                                                                                                                                                                                                                                                                                                                                                                                                                                                                                                                                                                                                                                             |
|                                 |                                                                                                                                                                                                                                                                                                                                                                                                                                                                                                                                                                                                                                                                                                                                                                                                                                                                                                                                                                                                                                                                                                                                           |

SCHOLARONE™  
Manuscripts

1  
2  
3  
4  
5  
6  
7  
8  
9  
10  
11  
12  
13  
14  
15  
16  
17  
18  
19  
20  
21  
22  
23  
24  
25  
26  
27  
28  
29  
30  
31  
32  
33  
34  
35  
36  
37  
38  
39  
40  
41  
42  
43  
44  
45  
46  
47  
48  
49  
50  
51  
52  
53  
54  
55  
56  
57  
58  
59  
60

For peer review only

1  
2  
3 **WHISPER or SHOUT study: Protocol of a cluster-randomised controlled trial**  
4 **assessing mHealth sexual reproductive health and nutrition interventions among**  
5 **female sex workers in Mombasa, Kenya**  
6  
7

8 Frances Ampt\*<sup>1,2</sup>, Collins Mudogo\*<sup>3</sup>, Peter Gichangi<sup>3,4,7</sup>, Megan Lim<sup>1,2</sup>, Griffins  
9 Manguro<sup>3</sup>, Matthew Chersich<sup>5</sup>, Walter Jaoko<sup>4</sup>, Marleen Temmerman<sup>3,6,7</sup>, Marilyn  
10 Laini<sup>3</sup>, Liz Comrie-Thomson<sup>1</sup>, Mark Stoové<sup>1</sup>, Paul A. Agius<sup>1,2,8</sup>, Margaret Hellard<sup>1</sup>, Kelly  
11 L'Engle<sup>9</sup>, Stanley Luchters<sup>1,2,7</sup>  
12  
13

14  
15 **Affiliations:**

- 16 1. Burnet Institute, Australia  
17 2. Department of Epidemiology and Preventive Medicine, Monash University,  
18 Australia  
19 3. International Centre for Reproductive Health (ICRH), Kenya  
20 4. University of Nairobi, Kenya  
21 5. Wits Reproductive Health and HIV Institute, Faculty of Health Sciences, University  
22 of the Witwatersrand, South Africa  
23 6. Aga Khan University, Kenya  
24 7. International Centre for Reproductive Health (ICRH), Department of Obstetrics  
25 and Gynaecology, Ghent University, Belgium  
26 8. Judith Lumley Centre, La Trobe University, Australia  
27 9. University of San Francisco, USA  
28  
29  
30  
31  
32  
33

34 \* both authors contributed equally to the manuscript.  
35  
36

37 **Corresponding author:** Associate Professor Stanley Luchters  
38 [Stanley.luchters@burnet.edu.au](mailto:Stanley.luchters@burnet.edu.au)  
39  
40  
41  
42  
43  
44  
45  
46  
47  
48  
49  
50  
51  
52  
53  
54  
55  
56  
57  
58  
59  
60

## Abstract

**Introduction:** New interventions are required to reduce unintended pregnancies among female sex workers (FSWs) in low- and middle-income countries, and to improve their nutritional health. Given sex workers' high mobile phone usage, repeated exposure to short message service (SMS) could address individual and interpersonal barriers to contraceptive uptake and better nutrition.

**Methods:** In this two-arm cluster randomised trial, each trial arm constitutes an equal-attention control group for the other. SMS messages were developed in a systematic, participatory and theory-driven manner, and cover either sexual and reproductive health (WHISPER) or nutrition (SHOUT). Messages were sent to participants 2-3 times/week for 12 months, and include fact-based and motivational content, and role model stories. Participants can send reply texts to obtain additional information. Sex work venues (clusters) in Mombasa, Kenya, were randomly sampled with a probability proportionate to venue size. Up to 10 women are being recruited from each venue, to a total sample of 860. FSWs aged 16-35 years, not currently pregnant and who have a mobile phone, are eligible. Structured questionnaires, urine pregnancy tests, HIV and syphilis rapid tests, and full blood counts will be performed at enrolment, six and twelve months.

**Analysis:** The primary outcome of WHISPER is unintended pregnancy incidence, and of SHOUT prevalence of anaemia at 12 months. Each will be compared between study groups using discrete-time survival analysis.

**Potential limitations:** Contamination may occur if participants discuss their intervention with those in the other trial arm. This is mitigated by cluster recruitment and only enrolling a small portion of all clusters.

**Conclusions:** The design allows for the simultaneous testing of two independent mHealth interventions, for which messaging frequency and study procedures are identical. This trial may guide future mHealth initiatives and provide methodological insights into use of reciprocal control groups.

**TRIAL REGISTRATION:**

Australian New Zealand Clinical Trial Registry: ACTRN12616000852459

## STRENGTHS AND LIMITATIONS OF TRIAL DESIGN

Strengths of the study include:

1. Use of a cluster-RCT with reciprocal controls allows for the simultaneous testing of two mHealth interventions, for which message frequency and study processes are identical; only the content of the messages differs.
2. Testing two independent hypotheses simultaneously is efficient, using considerably fewer resources than needed for two independent trials.
3. The design mitigates biases from unequal attention in trial groups (i.e., participants in both groups have comparable interaction with the study team), positive expectations, and non-blinding.<sup>1 2</sup>

Important limitation of the study are:

1. The potential for contamination may arise if women receiving SRH messages share them or discuss their content with women in the nutrition arm, and vice versa. Contamination would diminish the ability to detect a difference in effectiveness between the two groups. Cluster-based intervention allocation has been used to reduce the potential for contamination between individuals; though FSWs often work from multiple venues, so may come in contact with participants from other clusters. Also countering this limitation, we are recruiting only a small portion of sex workers across a large geographic area (up to 106 of 760 hot spots, and 860 of an estimated 8,516 FSWs), which diminishes the chances of interaction between trial arms. Lastly, we will attempt to measure contamination by asking about message sharing in the questionnaire.
2. A further potential limitation of this design is that the outcomes of the interventions may interact. While the two health domains were chosen due to the minimal overlap between behaviours, there are some plausible points of influence between the arms. For example, higher rates of pregnancy in the nutrition arm may lower haemoglobin and iron levels in these women. More generally, those receiving messages on one aspect of health may improve their health behaviours in multiple health domains, potentially diluting the effect measures of the comparison between the study arms.
3. It is also important to note that the SRH intervention aims to increase demand for contraceptives, and that translating demand into raised coverage may be limited by deficiencies in the health system (supply-side issues). These may include commodity stock-outs, insufficient choice of methods offered to women, and discriminatory treatment of FSWs by health workers.<sup>3,4</sup> Supply-side issues may also influence outcomes in the nutrition group, for example, if a limited range of foods is available in the area.
4. Although nutrition messages may alter knowledge and attitudes, women's socio-economic conditions may preclude a change in diet and thus in nutritional markers such as haemoglobin.

- 1  
2  
3 5. The use of both push and pull technologies is a novel and potentially  
4 powerful approach, however their simultaneous use may make it difficult to  
5 determine the size of their independent effects. We will perform a dose-  
6 response sub-analysis to examining whether differential exposure to  
7 messages (pull or push) is associated with the trial outcomes.  
8  
9

## 10 11 12 INTRODUCTION

### 13 14 *Female sex work*

15  
16 Despite sex work being very common in sub-Saharan Africa, with one in twenty  
17 women estimated to have exchanged sex for money, goods or other favours,<sup>5</sup> it  
18 remains a highly stigmatised and mostly criminalised practice, including in Kenya.<sup>5 6</sup>  
19 The hostile politico-legal and social environment limits sex workers access to health  
20 services, especially for sexual and reproductive health (SRH), and for preventing and  
21 treating HIV and other sexually transmitted infections (STIs).<sup>7</sup> Strategies such as  
22 providing peer education and outreach services are often unable to overcome the  
23 myriad of structural, personal and financial challenges that female sex workers  
24 (FSWs) face.<sup>8</sup> This complex situation calls for new interventions that complement the  
25 current package of services, and that together improve health and social outcomes  
26 for sex workers.  
27  
28  
29  
30  
31

### 32 *Unintended pregnancies among female sex workers*

33  
34 In many low-income countries, increased provision of low-cost contraceptive  
35 methods has raised contraception coverage in the general population,<sup>9 10</sup> but such  
36 gains remain inequitably distributed within countries,<sup>11</sup> and they have not translated  
37 into improvements for FSWs.<sup>12</sup> This is due to a combination of *individual* barriers to  
38 uptake, such as side effects of some contraceptive methods that impact sex work,  
39 and myths and misconceptions about particular methods;<sup>13 14</sup> *interpersonal* barriers,  
40 including peer norms and pressure from partners not to use contraception,<sup>12</sup> and  
41 *structural* barriers, such as stigmatising treatment of FSWs by the health system.<sup>15</sup>  
42 Most programs established to improve the health of FSWs primarily focus on HIV  
43 and other STIs, and overlook FSWs' broader reproductive needs.<sup>12 16 17</sup> A systematic  
44 review of SRH projects aimed at FSWs in Africa found that only a small minority  
45 provided pregnancy testing or contraceptive services other than condoms, and few  
46 specifically promoted dual method use (the concurrent use of condoms and another  
47 effective contraceptive method).<sup>18</sup>  
48 Available data indicate that use of contraception other than condoms by FSWs in  
49 sub-Saharan Africa is variable, but generally low, ranging from around 15 to 50%.<sup>12</sup>  
50  
51  
52  
53  
54  
55  
56  
57  
58  
59  
60  
19-21 Dual method use is rarely measured, but estimated at 10% in one study in  
Mombasa, Kenya.<sup>12</sup> The most popular modern method, injectable progestin<sup>22</sup> is

1  
2  
3 prone to discontinuation and contraceptive failure due to incorrect use.<sup>23 24</sup> In  
4 contrast, highly effective and low maintenance long-acting reversible contraceptives  
5 (intrauterine devices and subdermal implants) are under-utilised, with only 7% of a  
6 sample of FSWs in Mombasa having ever used these methods.<sup>12</sup>

7  
8 While few studies have specifically aimed to measure unintended pregnancy among  
9 FSWs, HIV prevention studies among FSWs have reported unexpectedly high rates of  
10 pregnancy, with 12-month cumulative incidence of 24% in Kenya,<sup>12</sup> 23% in  
11 Madagascar,<sup>20</sup> 27% in Rwanda<sup>25</sup> and 23% in the Caribbean.<sup>26</sup> Unintended pregnancy  
12 exposes women to significant health and social risks, such as unsafe (and often  
13 illegal) abortion, high maternal and infant morbidity and mortality for those who  
14 continue with the pregnancy,<sup>27</sup> and increased financial dependency on sex work,  
15 which in turn increases their risk of HIV, other STIs, violence and repeat pregnancies.  
16  
17  
18  
19

### 20 **Nutrition and nutritional status among female sex workers**

21 Urban food insecurity is a growing public health problem in sub-Saharan Africa, and  
22 disproportionately affects poor populations, who are more exposed to nutritional  
23 risks and have less capacity to adopt effective coping strategies.<sup>29</sup> As a result of rapid  
24 urbanization in low- and middle-income countries - and associated changes in diet  
25 leading to overreliance on non-home prepared food that tends to be high in energy,  
26 sugar and salt and low in nutrients - under-nutrition and micronutrient deficiencies  
27 are increasingly occurring alongside over-nutrition, overweight and obesity.<sup>29-31</sup> Both  
28 under-nutrition and over-nutrition are risk factors for poor health and mortality  
29 globally.<sup>32</sup> In women of reproductive age, micronutrient deficiency leads to  
30 increased pregnancy complications, and child and maternal morbidity and  
31 mortality.<sup>33</sup> Anaemia, predominantly caused by iron deficiency, is endemic among  
32 women in sub-Saharan Africa; in Kenya, 36% of pregnant women and 25% of non-  
33 pregnant women are estimated to be anaemic.<sup>34</sup>

34 While there are no published data on malnutrition among FSWs in Kenya, lack of  
35 physical activity, chaotic lifestyles and poor diet are factors which are likely to  
36 increase the susceptibility of FSWs to unhealthy weight gain, while at the same time  
37 contributing to their risk of micronutrient deficiency. Equally, food insecurity and  
38 hunger have been identified as key push factors for women to initiate and continue  
39 sex work.<sup>35 36</sup> In one study of sex workers in the Lagos metropolitan area in Nigeria,  
40 35% of respondents had entered sex work as a coping strategy in response to food  
41 insecurity.<sup>37</sup>

### 42 **mHealth interventions**

43 Mobile phones have the potential to effectively engage FSWs, provide information,  
44 improve knowledge and address individual and interpersonal barriers to  
45 contraception use and nutritional health. Mobile phone coverage is over 80% in  
46 Kenya,<sup>38</sup> and close to ubiquitous among FSWs, who constitute a large mobile  
47  
48  
49  
50



1  
2  
3 population that relies on mobile phones for maintaining social and business  
4 networks (unpublished formative research from Mombasa). mHealth interventions  
5 allow for repeated, theory-driven, user-centred, and low-cost exposure which is  
6 known to be important for securing behaviour change.<sup>39</sup>  
7  
8 Short messaging service (SMS) technology has been shown to impact health  
9 behaviour in a number of systematic reviews on the topic.<sup>40-43</sup> There are, however,  
10 few randomised-controlled trials (RCTs) addressing SRH behaviour through SMS.<sup>44-46</sup>  
11 Two trials in Australia demonstrated improvements in health-seeking behaviour and  
12 sexual health outcomes, particularly among young women.<sup>45,46</sup> Non-randomised  
13 trials and program evaluations have also had positive findings.<sup>47,48</sup> With regards to  
14 nutrition, trials in the USA and Iran have demonstrated the efficacy of SMS for  
15 changing eating behaviours<sup>49</sup> and knowledge and attitudes towards iodine  
16 consumption,<sup>50</sup> respectively. SMS interventions targeting over-nutrition have also  
17 been tested,<sup>51-55</sup> some of which significantly impacted on weight reduction.<sup>51-53</sup>  
18 Overall, research is failing to keep up with the rapid proliferation of mHealth  
19 interventions.<sup>42</sup> Despite the potential gains, there remains a lack of rigorous research  
20 that evaluates SRH promotion initiatives in LMICs,<sup>56</sup> and within the field of nutrition  
21 the lack of rigorous data is even more pronounced. Furthermore, among populations  
22 like FSWs from low-resource settings, who tend to have lower health knowledge and  
23 fewer resources for obtaining health information, intervention impact may be  
24 greater than that observed in high-income countries.  
25  
26  
27  
28  
29  
30  
31

### 32 ***WHISPER and SHOUT interventions***

34 The Women's Health Intervention using SMS for Preventing Unintended Pregnancy  
35 (WHISPER) study was developed in response to the substantial SRH needs of FSWs in  
36 Kenya, the potential gains offered by increasing demand for family planning among  
37 FSWs through mHealth, and the research gaps in this field. If found to be effective,  
38 mHealth for SRH could be added to the current service packages provided for sex  
39 workers, complementing and supporting the effectiveness of these services.  
40

41 Similarly, the need to improve nutrition for women in poor and vulnerable settings,  
42 and the paucity of data on FSWs' nutritional health, led to the development of the  
43 SMS intervention to improve nutritional Health OUTcomes (SHOUT). The SHOUT trial  
44 will provide important preliminary data on this under-investigated issue, and explore  
45 whether mHealth can offer an effective means of addressing malnutrition and  
46 anaemia in this population.  
47

48 This paper presents the protocol for the WHISPER or SHOUT study, which  
49 commenced in September 2016. Recruitment is anticipated to continue until June  
50 2017, and 12-month data collection to finish in June 2018.  
51  
52  
53  
54  
55  
56  
57  
58  
59  
60

## METHODS AND ANALYSIS

This is a two-arm cluster-RCT, which will examine the effectiveness of two parallel interventions (addressing SRH and nutrition respectively) delivered via mobile phone among FSWs in Mombasa, Kenya. As each intervention addresses a unique set of specific issues, and the mode of delivery and level of exposure is the same, each trial arm serves as an appropriate reciprocal control group for the other.<sup>1</sup>

### *Study objectives and outcomes*

The overall aim is to improve the health and wellbeing of female sex workers in resource-constrained settings. Specifically, the study will assess the effectiveness of two independent 12-month mobile phone-delivered interventions in improving:

- i) SRH outcomes for FSWs receiving the WHISPER intervention, compared to women receiving a nutrition intervention; and
- ii) nutritional status for FSWs receiving the SHOUT intervention compared to women receiving an SRH intervention.

The feasibility and acceptability of the interventions will also be assessed, using a combination of quantitative methods (structured questionnaires at six and 12 months) and qualitative methods (in-depth interviews at 12 months).

### **WHISPER**

The primary study outcome for WHISPER is the incidence of unintended pregnancy over 12 months of follow-up. Unintended pregnancy is defined as pregnancy that is mistimed, unplanned, or unwanted at the time of conception.<sup>57</sup> Women in the study are asked about their pregnancy intentions for the forthcoming six months at enrolment, and at the six and 12 month visits. A psychometrically-validated 6-item questionnaire (London Measure of Unintended Pregnancy) will also be used to score pregnancy intention in cases where pregnancy occurs during study follow-up.<sup>58</sup>

Pregnancy events are defined as either a positive result on urine pregnancy screening at the six or 12 month visits (or at unscheduled visits should these occur), or a self-reported pregnancy that has occurred between study visits.

Secondary outcomes will be measured at baseline and six and 12 months, and include incidence of HIV and syphilis measured by point-of-care testing, and self-reported SRH knowledge, behaviour and service utilisation (assessed by structured questionnaire).

### **SHOUT**

The primary study outcome for SHOUT is the prevalence of anaemia at 12 months of follow-up. This outcome is measured using a certified laboratory-based haematology machine at baseline and 12 months, and is defined as haemoglobin level below 12.0g/dL, consistent with the World Health Organisation definition).<sup>34</sup> A point-of-

1  
2  
3 care haemoglobinometer will also be used to enable immediate management of  
4 anaemia, but the laboratory measure will be used to calculate the primary outcome.  
5 Secondary outcomes include mean haemoglobin (Hb) levels at 12 months,  
6 prevalence of malnutrition (measured by anthropometry at baseline and six and 12  
7 months), and self-reported nutritional knowledge and behaviour (assessed by  
8 structured questionnaire at baseline and six and 12 months).  
9  
10

## 11 **Study intervention**

### 12 **Development of WHISPER or SHOUT study interventions**

13  
14  
15 Changes in attitudes and behaviours are most likely to occur when communication  
16 interventions are theory-driven, interactive and follow best practice in design and  
17 implementation.<sup>59</sup> Furthermore, sustainable positive behaviour change among  
18 individuals and communities occurs as a process, supported by carefully designed  
19 interventions, and not as a single event.<sup>60 61</sup>  
20

21  
22 The WHISPER and SHOUT interventions were therefore developed following a pre-  
23 defined protocol and in a systematic and participatory manner, ensuring that the  
24 intervention was grounded in evidence, was relevant and acceptable to the study  
25 population, and followed a logical process of behaviour change based on staged and  
26 social cognitive theoretical approaches.<sup>62</sup> An extensive review of the literature and  
27 consideration of health behaviour change theory informed the development of logic  
28 models for both study arms (figures 1 and 2), and the subsequent drafting of  
29 messages. Participatory and user-centred design and testing of the mobile phone  
30 intervention<sup>63-65</sup> was conducted with the target population in four informal  
31 consultative meetings, 12 formal workshops and 24 usability testing interviews.  
32 FSWs were involved in identifying important issues that affect them, developing  
33 messages and role model stories, reviewing and refining the content, and suggesting  
34 changes to the intervention architecture.  
35  
36  
37  
38  
39  
40

### 41 **Structure and delivery of the intervention**

42 Both the SRH and nutrition intervention consist of SMS (text) messages sent to  
43 participants two to three times per week for 12 months.

44 This includes the following components:

- 45 • 'Push' texts covering the main content domains, providing simple  
46 information, motivational messages and strategies to prompt action;
- 47 • 'Role model stories' about FSWs modelling healthy social norms and sent in  
48 4-5 instalments in one month (alternating months with stand-alone  
49 messages);
- 50 • A 'pull', or on-demand menu that participants can access by texting into the  
51 system to obtain more information on high-priority topics and local services.  
52  
53  
54  
55  
56  
57  
58  
59  
60

The intervention is being delivered by the VOTO mobile (<https://www.votomobile.org/>) online platform. All messages are loaded onto the system in a pre-determined order and sent automatically to each cluster of participants at the scheduled time (calculated from each cluster's start date). Participants are able to text assigned codes at any time during the study to access the pull messages, with SMS costs incurred by the study (no charge for participants). Content is only accessible to enrolees in the relevant intervention group, so that those in the nutrition arm cannot directly access SRH messages, and vice versa.

**Table 1: Number, length and timing of messages for each study arm**

| Message type                                                    | Number of messages                                         | Length                                             | Timing                                                                                                |
|-----------------------------------------------------------------|------------------------------------------------------------|----------------------------------------------------|-------------------------------------------------------------------------------------------------------|
| Push messages                                                   | 82 (both arms)                                             | Up to 160 characters (1 SMS 'screen') <sup>1</sup> | 3 per week (Monday, Wednesday and Saturday mornings) during months 1, 3, 5, 7, 9, 11, 13 <sup>2</sup> |
| Push interview reminders and study information                  | 7 (both arms)                                              | 160 – 480 characters (1-3 screens)                 |                                                                                                       |
| 'Alerts': push messages linking participants to the pull system | 19 (SRH); 18 (nutrition)                                   | 160 - 320 characters (1-2 screens)                 |                                                                                                       |
| Role model stories (push messages)                              | 26 (SRH); 27 (nutrition) (covering 6 stories for each arm) | 160 – 640 characters (1-4 screens) per message     | 2 per week (sent Monday and Friday mornings) during months 2, 4, 6, 8, 10, 12                         |
| Pull (on-demand) messages                                       | 80 (SRH); 49 (nutrition)                                   | 160 – 640 characters (1-4 screens)                 | User determined                                                                                       |

Table 1 presents a summary of the structure of the interventions, showing that the interventions are essentially equivalent in all structural components except the on-demand system. This discrepancy is due to additional pull messages in WHISPER which provide information about SRH services, allowing participants to link in with local sex worker-sensitive providers. This was deemed important on ethical grounds given the sensitive content of the WHISPER intervention, and because promotion of contraception can only impact pregnancy rates if delivered alongside accessible services that provide the methods in question.

In contrast, the promotion of healthy eating does not require an intermediate service utilisation step to result in improved nutritional outcomes. Furthermore, low-cost or free nutrition services are not widely available in Mombasa, and screening asymptomatic non-pregnant women for anaemia is rarely practiced, so we were unable to reliably list relevant services for SHOUT.

<sup>1</sup> Messages are charged per 160 characters (1 screen). Messages longer than this will appear as 1 long SMS on most phones, but may be split into multiple messages on older phones.

<sup>2</sup> There are 13 blocks of 4 weeks each, making up 12 calendar months in total.

### **Setting and participants**

Eligible women are recruited from mapped sex work venues by well-established peer outreach workers. Sex work venues consist of fixed-site businesses including nightclubs, bars, brothels and hotels, as well as public spaces such as street corners and beaches, where sex is known to be bought and sold. The study is conducted in two areas of Mombasa, a major economic centre in Kenya and East Africa, with busy port, rail and industrial enterprises. The local implementing partner, International Centre for Reproductive Health (ICRH; a WHO Collaborating Centre for Reproductive Health in Mombasa) has a research track record in the area dating back to 2002, including many trials and other prospective intervention studies with FSWs<sup>66-68</sup> and numerous non-interventional studies.<sup>69-72</sup>

### **Inclusion and exclusion criteria**

To be eligible for participation, women must: 1) be aged 16 to 35 years; 2) self-report having engaged in sex work (received money in exchange for sex) at the site of recruitment in the last six months; 3) not currently be pregnant or planning pregnancy within 12 months; 4) currently reside, and plan to continue residing within the study area for the next 12 months; 5) have a personal mobile phone with Safaricom or Airtel subscription, and be willing to provide the phone number to the researchers to receive the intervention messages; 6) self-report to be SMS literate (i.e., to be able to read text messages in English); 7) be willing to return for follow-up after six and 12 months; 8) be willing to provide contact information (e.g. home address) to be contacted or visited by a member of the research team in the community to remind them to re-attend follow-up visits; and 9) be able and willing to give written informed consent for enrolment in the study.

Exclusion criteria include participation in another mHealth intervention study or in the formative research for this study, and having a medical or non-medical condition detected through screening that hinders study participation, as confirmed by the local Principal Investigator.

### **Randomisation and sampling strategy**

ICRH and collaborators, conducted a two-stage geographic mapping and enumeration exercise of FSWs in 2014, estimating that 11,777 (range 9,265-14,290) FSWs operate from 1053 venues across four sub-counties of Mombasa County.<sup>64</sup>

We are recruiting FSW from two of these areas: Changamwe (where an estimated 3,435 FSWs work from 285 venues) and Kisauni (where an estimated 5,081 FSWs work from 475 venues).<sup>64</sup>

A two-stage sampling process has been adopted, drawing on this sampling frame. At the first stage, FSW venues were selected with a probability proportionate to the enumerated size of the sex worker population at the venue, and randomised to either control or intervention arms. Each venue is considered to be a separate

1  
2  
3 cluster. At the second stage, 10 FSWs are consecutively selected from each venue,  
4 based on an estimated mean cluster size of 11.<sup>64</sup> At venues where less than 10 FSWs  
5 are active, all FSWs from the selected venue are invited to participate in the study.  
6 Sampling of FSW venues will continue until the required sample size of 860 women is  
7 achieved.  
8

9  
10 Cluster randomisation was done centrally by the statistician and prior to recruitment  
11 commencing, with an equal number of clusters in both arms. Participants and study  
12 team are blinded to intervention and control allocation until after cluster enrolment  
13 is completed and all baseline questionnaires administered for that cluster.  
14

15 Overall, our approach aims for optimal (as random as possible) sampling from the  
16 FSW population, while minimising the potential intervention dilution effects of  
17 message sharing that might occur with individual-level randomisation.  
18  
19

### 20 **Recruitment and enrolment**

21 Community mobilisers and peer educators employed by the study apply minimum  
22 pre-screening at the site of recruitment to identify potential study participants.  
23 Potentially eligible women receive a card with a unique, anonymous *referral card*  
24 *number* (made up of cluster number and sequential participant number for that  
25 cluster). They are requested to go to the nearest study clinic for full eligibility  
26 screening, consenting and enrolment within the next three days. The study clinics  
27 are embedded in existing facilities: an ICRH-run sex-worker drop-in centre in Kisauni  
28 and a municipal community health centre in Changamwe. The number of sex  
29 workers approached and referral cards disbursed at each cluster are documented, as  
30 well as reasons for ineligibility at pre-screening.  
31

32 Volunteers must bring their referral card number with them to undergo the  
33 screening process to ensure that only volunteers selected by the random sampling  
34 process are enrolled. Women who consent for participation and successfully  
35 complete full screening have their study identification number assigned and are then  
36 formally enrolled.  
37  
38

### 39 **Data collection**

40 Study visits are conducted at enrolment and after six and 12 months at the study  
41 clinics. All study staff, including clinicians, research assistants, community mobilisers  
42 and peer educators, were trained in the study procedures via a five-day workshop  
43 and undertake additional targeted sessions where required.  
44

45 Procedures for the enrolment visit include collecting informed consent,  
46 administering the baseline questionnaire, and performing clinical examination, urine  
47 pregnancy test, point-of-care blood tests for HIV, syphilis, and Hb level, and  
48 venepuncture for full blood count (haemogram; includes Hb, haematocrit, mean cell  
49 volume and white blood count). Follow-up assessments are presented in Table 2.  
50  
51  
52  
53  
54  
55  
56  
57  
58  
59  
60

**Table 2: Schedule of assessments for the WHISPER or SHOUT trial**

| Assessments                                                                       | Month 0 | Month 6 | Month 12 |
|-----------------------------------------------------------------------------------|---------|---------|----------|
| Structured questionnaire                                                          | ✓       | ✓       | ✓        |
| Clinical examination                                                              | ✓       | ✓       | ✓        |
| Urine pregnancy testing                                                           | ✓       | ✓       | ✓        |
| Point-of-care HIV and syphilis testing (including pre- and post-test counselling) | ✓       | ✓       | ✓        |
| Hb measured by haemoglobinometer                                                  | ✓       |         | ✓        |
| Full blood count                                                                  | ✓       |         | ✓        |
| In-depth interviews (subgroup of participants from SRH arm)                       |         |         | ✓        |

Questionnaires were developed in English and translated into Swahili, and were based on previously validated measurement tools wherever possible. The baseline questionnaire captures detailed socio-demographic information including education, literacy, employment, income, family and living circumstances, health and illness, and sex work history. SRH enquiry covers previous pregnancy(ies); six-month pregnancy intention; contraception and condom use (including dual protection); reasons for discontinuation or non-use of contraception; contraceptive self-efficacy; sexual and reproductive health seeking and service utilisation; sexual risk behaviours; SRH knowledge and attitudes; relationship control and joint-decision-making with non-paying emotional partners. Participants are asked about whether they have recent STI-related symptoms, which are classified and treated as per syndromic STI guidelines.<sup>73</sup> Nutrition questions gather data on nutrition-related health seeking and service utilisation; food- and hygiene-related knowledge and behaviours; dietary intake and preparation; and food purchasing.

Clinical examination is performed by study clinicians, and includes STI syndromic management and anthropometric measurements to assess nutritional status (i.e. weight, height, waist circumference, hip circumference and mid upper-arm circumference).

The results of rapid diagnostic tests are communicated to the participants at the time of the visit. Participants newly diagnosed with HIV are referred for treatment at specialised centres. Those with positive TPHA are treated with benzathine penicillin at the study visit. Participants with anaemia receive one month of iron and folic acid supplementation, along with a referral to a health facility for follow-up.

Following enrolment, each participant is registered in the VOTO online platform. No identifying details apart from mobile phone number are entered. Intervention allocation is performed by data management staff independent of the study team, and occurs after enrolment is completed for each cluster.

1  
2  
3 The intervention commences simultaneously for all participants of one cluster in the  
4 week following completed cluster-level enrolment (this corresponds to day one,  
5 when the first message is sent).  
6  
7

## 8 **DATA ANALYSES**

### 9 **Analysis of primary endpoints**

10 Primary analysis for WHISPER and SHOUT will compare the primary endpoints  
11 (unintended pregnancy incidence and anaemia prevalence respectively) between  
12 groups at 12 months. The data analysis team will be blinded to the allocation of  
13 participants. Given the interval-censored nature of unintended pregnancy incidence,  
14 discrete-time survival models using generalised linear modelling will be used to  
15 compare unintended pregnancy incidence between the two trial arms. Comparison  
16 of differences in prevalence of anaemia between study arms will be undertaken  
17 using multi-level generalised linear modelling  
18

19 These analyses will, where appropriate, provide estimates with robust standard  
20 errors for FSW venue clustering. Standardised probability weighting will be applied  
21 in population-averaged analyses to account for any sampling bias where achieved  
22 sample cluster sizes vary. Also, where randomisation is not effective in removing  
23 allocation bias, adjusted models will be specified. In all analyses, associations will be  
24 considered statistically significant at the 5% level.  
25  
26  
27  
28  
29  
30  
31

### 32 **Sample size**

33 The sample size was calculated to obtain sufficient power to examine the effects of  
34 the SRH intervention. Based on a 12-month incidence of unintended pregnancy of  
35 24% in the control group (data from previous research in the study population),<sup>12</sup>  
36 enrolment of 860 participants from a minimum of 86 FSW venues would detect a  
37 relative reduction in annual unintended pregnancy incidence of 37% (hazard  
38 risk=0.63), at 80% power and 5% significance level. This estimate is adjusted for an  
39 expected 10% attrition rate (based on previous experience with this population<sup>12</sup>)  
40 and an estimated inflation in standard error due to cluster randomisation (design  
41 effect=1.18; estimated intra-cluster correlation coefficient (ICC)=0.02, with a cluster  
42 size of 10.<sup>74</sup>  
43

44 Sample size could not be reliably calculated for the SHOUT trial as estimates of  
45 anaemia in the local sex work population are not available. However, if we assume a  
46 prevalence of 25% (as per the nationally estimate for non-pregnant women<sup>34</sup>), the  
47 calculated sample size of 860 would allow for detection of an approximate 42%  
48 reduction in odds of anaemia prevalence, with inflation in standard error and  
49 attrition rate adjustments applied as above.  
50  
51  
52  
53  
54  
55  
56  
57  
58  
59  
60



## ***ETHICS AND DISSEMINATION***

Written informed consent will be obtained from every study participant. Women aged 16 and 17 years are considered mature minors, and able to consent without involving parents and guardians, due to the sensitive nature of the subject matter. Informed consent forms are available in both Kiswahili and English, and describe the purpose of the study, the procedures to be followed, and the risks and benefits of participation. Most importantly, we are aware of the risk that others seeing the messages may infer that the participant is a sex worker. It is important to mitigate this risk of unintentional disclosure of sex work status and consequent stigma or other adverse events for participants<sup>75</sup>. We will counsel participants about the need for care to be taken to ensure that others do not have access to their phones. The study team will also ask that participants report instances of unintentional disclosure. Such reporting will allow us to provide support to the women concerned and through understanding the events surrounding the case try find ways of avoiding future occurrences.

Ethical approvals have been obtained for protocol version 1.2, dated 22 August 2016 from the Australian Monash University Human Research Ethics Committee (MUHREC - CF16/1552 - 2016000812) and the Kenyan Kenyatta National Hospital, University of Nairobi Ethics and Research Committee (KNH-UoN ERC – KNH-ERC/RR/493).

Several dissemination activities are planned, including to health workers and the district office; the Kenya national policy makers; local and international conferences; and academic publications.

## **DISCUSSION**

### ***Potential impact and significance***

The WHISPER study responds to the pressing need for effective and evidence-informed interventions to prevent unintended pregnancies among vulnerable women in resource-constrained settings. Persistent unmet need for family planning contributed to inadequate progress towards reducing child mortality and improving maternal health (Millennium Development Goals 4 and 5), and to the need for the 2010 Global Strategy for Women's and Children's Health.<sup>11</sup> The ability to decide upon the number and timing of children, free from coercion and violence, is a fundamental human right. During the 2012 London Summit on Family Planning,<sup>76</sup> the Kenyan Government committed to increasing funding and contraception coverage by 2015. Despite this supply-side commitment, questions remain about the optimum mechanism to increase demand, particularly among marginalised populations. The WHISPER trial will assess an innovative, sustainable and scalable approach to address some of these gaps.

Study outcomes will be used to inform future policies and public health interventions aimed at increasing uptake of family planning, as well as other SRH

1  
2  
3 services, among vulnerable populations in a range of similar settings, particularly in  
4 LMICs. The rigorous research design and extensive local experience of our team will  
5 support advocacy and guide mobile technology services for health promotion as  
6 outlined in the 2010 Kenyan Government's Family Planning Guidelines.<sup>77</sup> If found to  
7 be effective, this intervention could be sustainably scaled-up across East Africa.  
8 With regards to nutritional health, there are renewed efforts to design and  
9 implement action-oriented research, however the role of mHealth in these initiatives  
10 remains uncertain.<sup>78</sup> The SHOUT study will go some way towards clarifying whether  
11 SMS technology provides a new way of responding to a long recognised, but poorly  
12 characterised and long neglected problem. Indeed, if shown to be effective in this  
13 trial, mHealth could be incorporated into broader nutrition strategies for FSWs in  
14 Africa and elsewhere, and has the potential to be scaled up for use with other  
15 women at a population level.

16  
17  
18  
19  
20 The innovative approach taken by the proposed interventions has never been used  
21 to prevent unintended pregnancies or improve nutrition among key risk populations  
22 in LMICs. A similar methodology in which SRH text messages were compared to a  
23 control SMS intervention has been adopted in Australia with a sun-safety control  
24 group,<sup>45</sup> and in the USA with a nutrition control group;<sup>48</sup> although the latter did not  
25 measure nutrition outcomes, unlike our trial. This trial will thus set standards for the  
26 mHealth field in LMICs, for both interventions and trial methodology. Lessons learnt  
27 about optimising SMS technology for both WHISPER and SHOUT could have  
28 considerable impact in Kenya, and similar countries, for a range of health priorities  
29 outside of those examined here.<sup>71</sup>

## 36 37 Conclusion

38 FSWs constitute a large, vulnerable, hard-to-reach population that could be  
39 amenable to mHealth interventions given their high mobile phone coverage and  
40 utilisation. FSWs are at considerable risk of unintended pregnancies, and could  
41 markedly benefit from interventions that increase uptake of contraception, with an  
42 emphasis on long-acting reversible technologies and dual method use. Similarly, the  
43 nutrition arm of the trial responds to the paucity of quality data on rates of  
44 malnutrition among sex workers and of effective interventions to improve their  
45 nutritional status and metabolic health.

46  
47  
48 A cluster-RCT with an equal-attention control and objective biological primary  
49 endpoints (unintended pregnancy and anaemia) is the most robust study design to  
50 test the effectiveness of the planned interventions. It is anticipated that the trial will  
51 contribute important evidence to mHealth initiatives among vulnerable populations  
52 and provide useful methodological insights into the use of reciprocal control groups  
53 within such trials.  
54  
55  
56  
57  
58  
59  
60

## Author declarations

### Acknowledgements

The authors gratefully acknowledge the contribution to this work of the Victorian Operational Infrastructure Support Program received by the Burnet Institute.

### Author contributions

The following authors were investigators on the trial from the outset (Frances Ampt, Collins Mudogo, Peter Gichangi, Megan Lim, Matthew Chersich, Walter Jaoko, Marleen Temmerman, Marilyn Laini, Liz Comrie-Thomson, Mark Stoové, Paul A. Agius, Margaret Hellard, Kelly L'Engle, Stanley Luchters). Griffins Manguro more recently joined the trial site in Kenya, leading work in that site. The paper draws from the trial protocol, which was written collectively, under the leadership of the Principal Investigator Stanley Luchters. The final version of the paper was read and approved by all authors.

### Funding

Funding was provided by the National Health and Medical Research Council of Australia (NHMRC) for Project grant GNT 1087006, Career Development Fellowships for S. Luchters and M. Stoové, and Postgraduate Scholarship for F. Ampt. The sponsor did not have any contribution to the study design, data collection, management, analysis or interpretation.

### Competing Interests

None declared

### Ethics approvals

Monash University (MUHREC)  
Kenyatta National Hospital Ethics and research committee.

### Provenance and peer review

Not commissioned; externally peer reviewed

### Data sharing statement

Data presented in this paper are available from the corresponding author on request.

## References

1. Hartinger SM, Lanata CF, Hattendorf J, et al. Impact of a child stimulation intervention on early child development in rural Peru: a cluster randomised trial using a reciprocal control design. *J Epidemiol Community*

- 1  
2  
3 *Health* 2016 doi: 10.1136/jech-2015-206536 [published Online First:  
4 2016/09/11]
- 5 2. Hartinger SM, Lanata CF, Hattendorf J, et al. Improving household air, drinking  
6 water and hygiene in rural Peru: a community-randomized-controlled  
7 trial of an integrated environmental home-based intervention package to  
8 improve child health. *International journal of epidemiology* 2016 doi:  
9 10.1093/ije/dyw242 [published Online First: 2016/11/08]
- 10 3. Mannava P, Durrant K, Fisher J, et al. Attitudes and behaviours of maternal  
11 health care providers in interactions with clients: a systematic review.  
12 *Global Health* 2015;11:36. doi: 10.1186/s12992-015-0117-9
- 13 4. Waldman L, Stevens M. Sexual and reproductive health and rights and mHealth  
14 in policy and practice in South Africa. *Reprod Health Matters*  
15 2015;23(45):93-102. doi: 10.1016/j.rhm.2015.06.009
- 16 5. Vandepitte J, Lyerla R, Dallabetta G, et al. Estimates of the number of female  
17 sex workers in different regions of the world. *Sexually transmitted*  
18 *infections* 2006;82 Suppl 3:iii18-25. doi: 10.1136/sti.2006.020081
- 19 6. Odek WO, Githuka GN, Avery L, et al. Estimating the size of the female sex  
20 worker population in Kenya to inform HIV prevention programming. *PloS*  
21 *one* 2014;9(3):e89180. doi: 10.1371/journal.pone.0089180
- 22 7. The Global Fund. Key Populations Action Plan 2014-2017. 2013
- 23 8. Rimal Nilu. Literature Review for Peer Education Programs for Key  
24 Populations.pdf>. 2010
- 25 9. Kyalo J, Jurczynska K, Kundu F. ImpactNOW application in Kenya: Policy brief.  
26 Washington: Health Policy Project & National Council for Population and  
27 Development, 2015.
- 28 10. Ross J, Stover J. Use of modern contraception increases when more methods  
29 become available: analysis of evidence from 1982-2009. *Global Health:*  
30 *Science and Practice* 2013;1(2):203-12. doi: 10.9745/ghsp-d-13-00010
- 31 11. Temmerman M, Khosla R, Bhutta ZA, et al. Towards a new Global Strategy for  
32 Women's, Children's and Adolescents' Health. *BMJ : British Medical*  
33 *Journal* 2015;351 doi: 10.1136/bmj.h4414
- 34 12. Luchters S, Bosire W, Feng A, et al. "A Baby Was an Added Burden":  
35 Predictors and Consequences of Unintended Pregnancies for Female Sex  
36 Workers in Mombasa, Kenya: A Mixed-Methods Study. *PloS one*  
37 2016;11(9):e0162871. doi: 10.1371/journal.pone.0162871 [published  
38 Online First: 2016/10/01]
- 39 13. Khan MR, Turner AN, Pettifor A, et al. Unmet need for contraception among  
40 sex workers in Madagascar. *Contraception* 2009;79(3):221-7. doi:  
41 10.1016/j.contraception.2008.09.011
- 42 14. Sutherland EG, Alaii J, Tsui S, et al. Contraceptive needs of female sex workers  
43 in Kenya - a cross-sectional study. *The European journal of contraception*  
44 *& reproductive health care : the official journal of the European Society of*  
45 *Contraception* 2011;16(3):173-82. doi: 10.3109/13625187.2011.564683
- 46 15. Scorgie F, Nakato D, Harper E, et al. 'We are despised in the hospitals': sex  
47 workers' experiences of accessing health care in four African countries.  
48 *Culture, Health and Sexuality* 2013;15(4):450-65. doi:  
49 <http://dx.doi.org/10.1080/13691058.2012.763187>
- 50 16. Schwartz S, Papworth E, Thiam-Niangoin M, et al. An urgent need for  
51 integration of family planning services into HIV care: the high burden of  
52  
53  
54  
55  
56  
57  
58  
59  
60

- 1  
2  
3 unplanned pregnancy, termination of pregnancy, and limited  
4 contraception use among female sex workers in Cote d'Ivoire. *Journal of*  
5 *acquired immune deficiency syndromes (1999)* 2015;68:S91-S98.
- 6  
7 17. Weldegebreal R, Melaku YA, Alemayehu M, et al. Unintended pregnancy  
8 among female sex workers in Mekelle city, northern Ethiopia: a cross-  
9 sectional study. *BMC Public Health* 2015;15:40.
- 10  
11 18. Dhana A, Luchters S, Moore L, et al. Systematic review of facility-based sexual  
12 and reproductive health services for female sex workers in Africa.  
13 *Globalization and health* 2014;10(1):46-46. doi: 10.1186/1744-8603-10-  
14 46
- 15  
16 19. Erickson M, Goldenberg SM, Ajok M, et al. Structural determinants of dual  
17 contraceptive use among female sex workers in Gulu, northern Uganda.  
18 *International Journal of Gynecology and Obstetrics* 2015;131(1):91-95.
- 19  
20 20. Feldblum PJ, Nasution MD, Hoke TH, et al. Pregnancy among sex workers  
21 participating in a condom intervention trial highlights the need for dual  
22 protection. *Contraception* 2007;76(2):105-10. doi:  
23 10.1016/j.contraception.2007.04.009
- 24  
25 21. McClelland RS, Richardson BA, Cherutich P, et al. A 15-year study of the  
26 impact of community antiretroviral therapy coverage on HIV incidence in  
27 Kenyan female sex workers. *AIDS* 2015;29(17):2279-86.
- 28  
29 22. Darroch JE, Singh S. Trends in contraceptive need and use in developing  
30 countries in 2003, 2008, and 2012: an analysis of national surveys. *The*  
31 *Lancet* 2013;381(9879):1756-62. doi: 10.1016/s0140-6736(13)60597-8
- 32  
33 23. Baumgartner JN, Morroni C, Mlobeli RD, et al. Timeliness of contraceptive  
34 reinjections in South Africa and its relation to unintentional  
35 discontinuation. *International family planning perspectives*  
36 2007;33(2):66-74. doi: 10.1363/ifpp.33.066.07 [published Online First:  
37 2007/06/26]
- 38  
39 24. Smit JA, Beksinska ME. Hormonal contraceptive continuation and switching  
40 in South Africa: implications for evaluating the association of injectable  
41 hormonal contraceptive use and HIV. *J Acquir Immune Defic Syndr*  
42 2013;62(3):363-5. doi: 10.1097/QAI.0b013e31827e818a [published  
43 Online First: 2012/11/29]
- 44  
45 25. Braunstein SL, Ingabire CM, Kestelyn E, et al. High human immunodeficiency  
46 virus incidence in a cohort of Rwandan female sex workers. *Sexually*  
47 *Transmitted Diseases* 2011;38(5):385-94.
- 48  
49 26. Deschamps MM, Metch B, Morgan CA, et al. Feasibility of Identifying a Female  
50 Sex Worker Cohort at High Risk of HIV Infection in the Caribbean for HIV  
51 Vaccine Efficacy Trials: Longitudinal Results of HVTN 907. *Journal of*  
52 *Acquired Immune Deficiency Syndromes* 2016;71(1):70-77.
- 53  
54 27. Singh S, Darroch JE, Ashford LS. Adding it up: The costs and benefits of  
55 investing in sexual and reproductive health 2014. New York: Guttmacher  
56 Institute, 2014.
- 57  
58 28. United Nations. The Sustainable Development Goals report 2016, 2016.
- 59  
60 29. Kimani-Murage EW, Schofield L, Wekesah F, et al. Vulnerability to food  
insecurity in urban slums: experiences from Nairobi, Kenya. *J Urban*  
*Health* 2014;91(6):1098-113. doi: 10.1007/s11524-014-9894-3

- 1  
2  
3 30. van 't Riet H, den Hartog AP, Hooftman DA, et al. Determinants of non-home-  
4 prepared food consumption in two low-income areas in Nairobi. *Nutrition*  
5 2003;19(11-12):1006-12.  
6  
7 31. van't Riet H, den Hartog AP, van Staveren WA. Non-home prepared foods:  
8 contribution to energy and nutrient intake of consumers living in two  
9 low-income areas in Nairobi. *Public Health Nutr* 2002;5(4):515-22.  
10  
11 32. Oldewage-Theron WH, Kruger R, Egal AA. Socio-Economic Variables and  
12 Nutrient Adequacy of Women in the Vaal Region of South Africa. *Ecol Food*  
13 *Nutr* 2014;53(5):514-27.  
14  
15 33. United Nations Children's Fund, United Nations University, World Health  
16 Organization. Iron deficiency anaemia, assessment, control and  
17 prevention: a guide for programme managers, 2010.  
18  
19 34. World Health Organization. The global prevalence of anaemia in 2011.  
20 Geneva: World Health Organization, 2015.  
21  
22 35. Fielding-Miller R, Mnisi Z, Adams D, et al. "There is hunger in my  
23 community": a qualitative study of food security as a cyclical force in sex  
24 work in Swaziland. *BMC Public Health* 2014;14:79.  
25  
26 36. Kunnuji M. Basic deprivation and involvement in risky sexual behaviour  
27 among out-of-school young people in a Lagos slum. *Cult Health Sex*  
28 2014;16(7):727-40.  
29  
30 37. Oyefara JL. Food insecurity, HIV/AIDS pandemic and sexual behaviour of  
31 female commercial sex workers in Lagos metropolis, Nigeria. *SAHARA J*  
32 2007;4(2):626-35.  
33  
34 38. International Telecommunication Union. Information and Communication  
35 Technology (ICT) Statistics 2016 [Available from:  
36 <http://www.itu.int/en/ITU-D/Statistics/Pages/stat/default.aspx>  
37 accessed 10 September 2016.  
38  
39 39. Mwaikambo L, Speizer IS, Schurmann A, et al. What Works in Family Planning  
40 Interventions: A Systematic Review. *Studies in Family Planning*  
41 2011;42(2):67-82. doi: 10.1111/j.1728-4465.2011.00267.x  
42  
43 40. Cole-Lewis H, Kershaw T. Text messaging as a tool for behavior change in  
44 disease prevention and management. *Epidemiol Rev* 2010;32:56-69. doi:  
45 10.1093/epirev/mxq004  
46  
47 41. Fjeldsoe BS, Marshall AL, Miller YD. Behavior change interventions delivered  
48 by mobile telephone short-message service. *Am J Prev Med*  
49 2009;36(2):165-73. doi: 10.1016/j.amepre.2008.09.040  
50  
51 42. Free C, Phillips G, Watson L, et al. The effectiveness of mobile-health  
52 technologies to improve health care service delivery processes: a  
53 systematic review and meta-analysis. *PLoS Med* 2013;10(1):e1001363.  
54 doi: 10.1371/journal.pmed.1001363  
55  
56 43. Armanasco AA, Miller YD, Fjeldsoe BS, et al. Preventive Health Behavior  
57 Change Text Message Interventions: A Meta-analysis. *American Journal of*  
58 *Preventive Medicine* 2017 (in press) doi:  
59 <http://dx.doi.org/10.1016/j.amepre.2016.10.042>  
60  
61 44. Tsur L, Kozer E, Berkovitch M. The Effect of Drug Consultation Center  
62 Guidance on Contraceptive Use Among Women Using Isotretinoin: A  
63 Randomized, Controlled Study. *Journal of Women's Health*  
64 2008;17(4):579-84. doi: 10.1089/jwh.2007.0623

- 1  
2  
3 45. Gold J, Aitken CK, Dixon HG, et al. A randomised controlled trial using mobile  
4 advertising to promote safer sex and sun safety to young people. *Health*  
5 *Educ Res* 2011;26(5):782-94. doi: 10.1093/her/cyr020  
6  
7 46. Lim MS, Hocking JS, Aitken CK, et al. Impact of text and email messaging on  
8 the sexual health of young people: a randomised controlled trial. *J*  
9 *Epidemiol Community Health* 2012;66(1):69-74. doi:  
10 10.1136/jech.2009.100396  
11 47. L'Engle KL, Vahdat HL, Ndakidemi E, et al. Evaluating feasibility, reach and  
12 potential impact of a text message family planning information service in  
13 Tanzania. *Contraception* 2013;87(2):251-6. doi:  
14 10.1016/j.contraception.2012.07.009  
15 48. Juzang I, Fortune T, Black S, et al. A pilot programme using mobile phones for  
16 HIV prevention. *Journal of Telemedicine and Telecare* 2011;17(3):150-53.  
17 doi: doi:10.1258/jtt.2010.091107  
18 49. Brown ON, O'Connor LE, Savaiano D. Mobile MyPlate: A Pilot Study Using  
19 Text Messaging to Provide Nutrition Education and Promote Better  
20 Dietary Choices in College Students. *Journal of American College Health*  
21 2014;62(5):320-27. doi: 10.1080/07448481.2014.899233  
22 50. Mehran L, Nazeri P, Delshad H, et al. Does a text messaging intervention  
23 improve knowledge, attitudes and practice regarding iodine deficiency  
24 and iodized salt consumption? *Public Health Nutrition* 2012;15(12):2320-  
25 25. doi: 10.1017/S1368980012000869  
26 51. Haapala I, Barengo NC, Biggs S, et al. Weight loss by mobile phone: a 1-year  
27 effectiveness study. *Public Health Nutr* 2009;12(12):2382-91. doi:  
28 10.1017/s1368980009005230 [published Online First: 2009/03/28]  
29 52. Lombard C, Deeks A, Jolley D, et al. A low intensity, community based lifestyle  
30 programme to prevent weight gain in women with young children: cluster  
31 randomised controlled trial. *BMJ* 2010;341 doi: 10.1136/bmj.c3215  
32 53. Joo NS, Kim BT. Mobile phone short message service messaging for behaviour  
33 modification in a community-based weight control programme in Korea. *J*  
34 *Telemed Telecare* 2007;13(8):416-20. doi:  
35 10.1258/135763307783064331 [published Online First: 2007/12/15]  
36 54. Patrick K, Raab F, Adams MA, et al. A Text Message-Based Intervention for  
37 Weight Loss: Randomized Controlled Trial. *Journal of Medical Internet*  
38 *Research* 2009;11(1):e1. doi: 10.2196/jmir.1100  
39 55. Shapiro JR, Bauer S, Hamer RM, et al. Use of Text Messaging for Monitoring  
40 Sugar-Sweetened Beverages, Physical Activity, and Screen Time in  
41 Children: A Pilot Study. *Journal of nutrition education and behavior*  
42 2008;40(6):385-91. doi: 10.1016/j.jneb.2007.09.014  
43 56. Lim MS, Hocking JS, Hellard ME, et al. SMS STI: a review of the uses of mobile  
44 phone text messaging in sexual health. *Int J STD AIDS* 2008;19(5):287-90.  
45 doi: 10.1258/ijisa.2007.007264  
46 57. US Centers for Disease Control and Prevention. "Unintended Pregnancy  
47 Prevention" [accessed December 22 2016].  
48 58. Hall J, Barrett G, Mbwana N, et al. Understanding pregnancy planning in a  
49 low-income country setting: validation of the London measure of  
50 unplanned pregnancy in Malawi. *BMC Pregnancy Childbirth* 2013;13:200.  
51 doi: 10.1186/1471-2393-13-200  
52  
53  
54  
55  
56  
57  
58  
59  
60

- 1  
2  
3 59. Noar SM, Palmgreen P, Chabot M, et al. A 10-year systematic review of  
4 HIV/AIDS mass communication campaigns: Have we made progress?  
5 *Journal of health communication* 2009;14(1):15-42.  
6  
7 60. WIC Programme. WIC programme nutrition education guidance, 2006.  
8  
9 61. California WIC Programme. How to evaluate a WIC Nutrition education  
10 Program, 2002.  
11  
12 62. US Department of Health and Human Services. Making health communication  
13 programs work. Washington, DC: US Department of Health and Human  
14 Services 2004.  
15  
16 63. Zhang D, Adipat B. Challenges, Methodologies, and Issues in the Usability  
17 Testing of Mobile Applications. *International Journal of Human-Computer*  
18 *Interaction* 2005;18(3):293-308. doi: 10.1207/s15327590ijhc1803\_3  
19  
20 64. Cheuk E, Becker M, Mishra S, et al. Understanding Female Sex Workers' Early  
21 HIV Risk and the Implications for HIV Epidemic Control (Transitions  
22 Study): Mapping and Estimating the Population Size of Female Sex  
23 Workers in Mombasa, Kenya and Dnipropetrovsk, Ukraine. 24th Annual  
24 Canadian Conference on HIV/AIDS Research: *Can J Infect Dis Med*  
25 *Microbiol* 2015:78B.  
26  
27 65. Yardley L, Morrison L, Bradbury K, et al. The Person-Based Approach to  
28 Intervention Development: Application to Digital Health-Related Behavior  
29 Change Interventions. *J Med Internet Res* 2015;17(1):e30. doi:  
30 10.2196/jmir.4055  
31  
32 66. Luchters S, Chersich MF, Jao I, et al. Acceptability of the diaphragm in  
33 Mombasa Kenya: a 6-month prospective study. *Eur J Contracept Reprod*  
34 *Health Care* 2007;12(4):345-53. doi: 10.1080/13625180701516989  
35  
36 67. Thomsen SC, Ombidi W, Toroitich-Ruto C, et al. A prospective study assessing  
37 the effects of introducing the female condom in a sex worker population  
38 in Mombasa, Kenya. *Sexually transmitted infections* 2006;82(5):397-402.  
39 doi: 10.1136/sti.2006.019992  
40  
41 68. L'Engle KL, Mwarogo P, Kingola N, et al. A randomized controlled trial of a  
42 brief intervention to reduce alcohol use among female sex workers in  
43 Mombasa, Kenya. *J Acquir Immune Defic Syndr* 2014;67(4):446-53. doi:  
44 10.1097/qai.0000000000000335 [published Online First: 2014/09/10]  
45  
46 69. Chersich MF, Luchters SM, Malonza IM, et al. Heavy episodic drinking among  
47 Kenyan female sex workers is associated with unsafe sex, sexual violence  
48 and sexually transmitted infections. *Int J STD AIDS* 2007;18(11):764-9.  
49 doi: 10.1258/095646207782212342  
50  
51 70. Luchters S, Chersich MF, Rinyiru A, et al. Impact of five years of peer-  
52 mediated interventions on sexual behavior and sexually transmitted  
53 infections among female sex workers in Mombasa, Kenya. *BMC Public*  
54 *Health* 2008;8:143. doi: 10.1186/1471-2458-8-143  
55  
56 71. Luchters S, Richter ML, Bosire W, et al. The contribution of emotional  
57 partners to sexual risk taking and violence among female sex workers in  
58 Mombasa, Kenya: a cohort study. *PloS one* 2013;8(8):e68855. doi:  
59 10.1371/journal.pone.0068855 [published Online First: 2013/08/21]  
60  
72. Pack AP, L'Engle K, Mwarogo P, et al. Intimate partner violence against  
female sex workers in Mombasa, Kenya. *Cult Health Sex* 2013 doi:  
10.1080/13691058.2013.857046



- 1  
2  
3 73. WHO. Guidelines for the Management of Sexually Transmitted Infections  
4 2004.
- 5 74. Cai Y, Shi R, Shen T, et al. A study of HIV/AIDS related knowledge, attitude  
6 and behaviors among female sex workers in Shanghai China. *BMC public*  
7 *health* 2010;10:377.
- 8 75. Rodrigues R, Poongulali S, Balaji K, et al. 'The phone reminder is important,  
9 but will others get to know about my illness?' Patient perceptions of an  
10 mHealth antiretroviral treatment support intervention in the HIVIND trial  
11 in South India. *BMJ open* 2015;5(11):e007574. doi: 10.1136/bmjopen-  
12 2015-007574 [published Online First: 2015/11/04]
- 13 76. Carr B, et al. Giving women the power to plan their families. *Lancet*  
14 2012;380:80-2. doi: 10.1016/S0140-6736(12)60905-2 [published Online  
15 First: 2012/07/13]
- 16 77. Reproductive Health Division - Kenya. National Family Planning Guidelines  
17 for Service Providers. , 2010.
- 18 78. Beratarrechea A, Moyano D, Irazola V, et al. mHealth Interventions to Counter  
19 Noncommunicable Diseases in Developing Countries: Still an Uncertain  
20 Promise. *Cardiology clinics* 2017;35(1):13-30. doi:  
21 10.1016/j.ccl.2016.08.009 [published Online First: 2016/11/26]
- 22  
23  
24  
25  
26  
27  
28  
29  
30  
31  
32  
33  
34  
35  
36  
37  
38  
39  
40  
41  
42  
43  
44  
45  
46  
47  
48  
49  
50  
51  
52  
53  
54  
55  
56  
57  
58  
59  
60

1  
2  
3  
4  
5  
6  
7  
8  
9  
10  
11  
12  
13  
14  
15  
16  
17  
18  
19  
20  
21  
22  
23  
24  
25  
26  
27  
28  
29  
30  
31  
32  
33  
34  
35  
36  
37  
38  
39  
40  
41  
42  
43  
44  
45  
46  
47  
48  
49

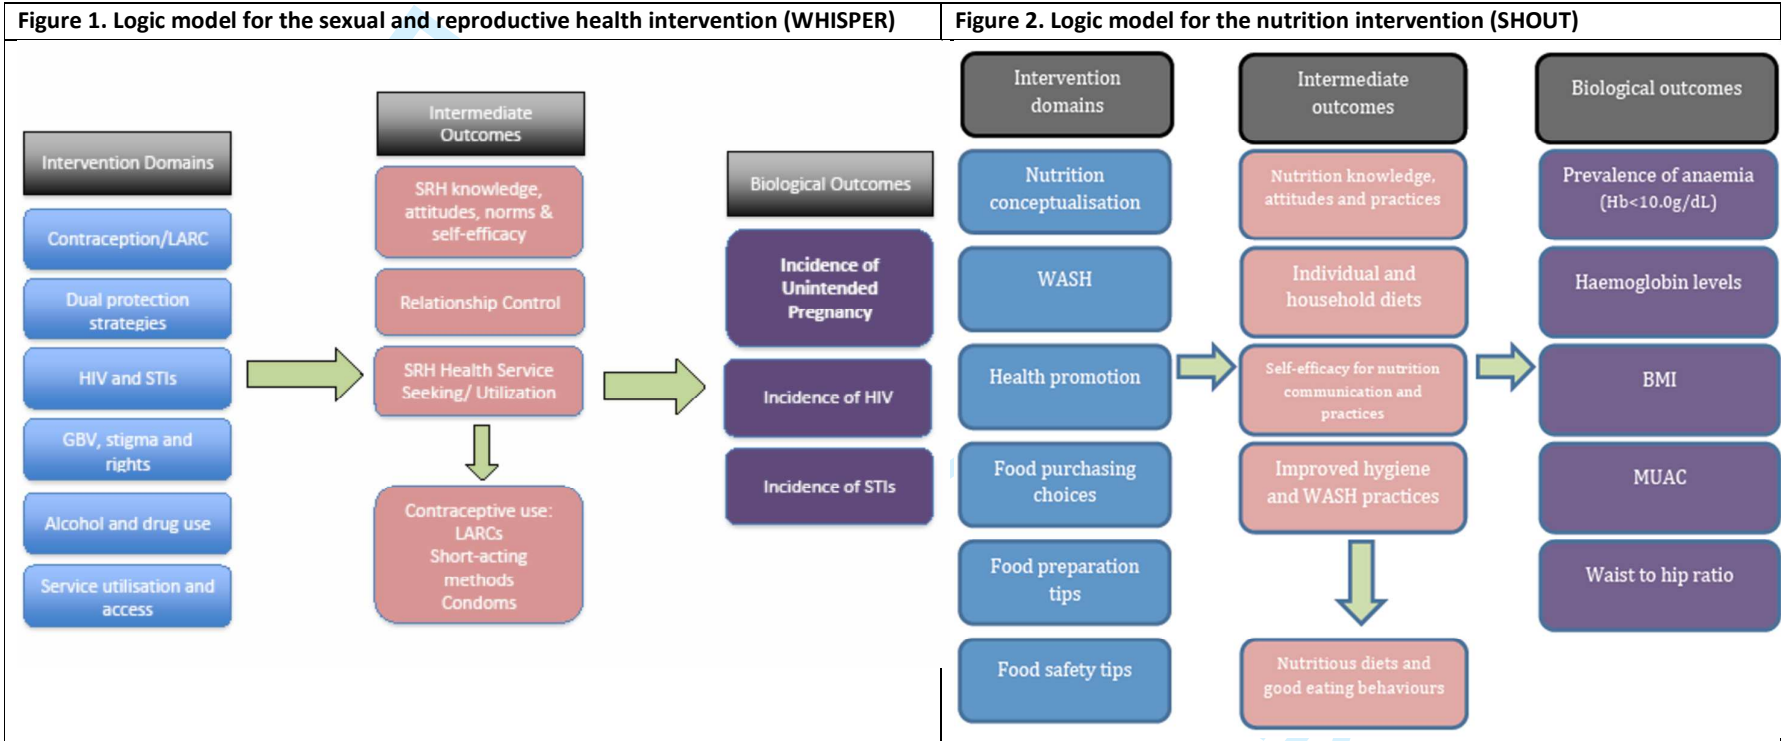

1  
2  
3  
4  
5  
6  
7  
8  
9  
10  
11  
12  
13  
14  
15  
16  
17  
18  
19  
20  
21  
22  
23  
24  
25  
26  
27  
28  
29  
30  
31  
32  
33  
34  
35  
36  
37  
38  
39  
40  
41  
42  
43  
44  
45  
46  
47  
48  
49

# Women's Health Intervention using SMS for Preventing Unintended Pregnancy (WHISPER)

or

# SMS intervention to improve nutritional Health OUTcomes (SHOUT)

A cluster Randomised Controlled Trial assessing mHealth  
interventions among female sex workers in Mombasa,  
Kenya

International Clinical Trials Registry number:  
ACTRN12616000852459

WHISPER or SHOUT study protocol, version 1.2,  
dated August 22<sup>nd</sup>, 2016

## 1 Executive summary

Female sex workers (FSWs) are at considerable risk of unintended pregnancies, which contribute substantially to maternal and perinatal morbidity and mortality, and socioeconomic vulnerability. Public health interventions that increase uptake of family planning methods among FSWs, including dual protection (use of condoms and another modern method of contraception), could markedly benefit this population. In addition, there is a growing acknowledgement of the potential importance of nutrition in the population, and the paucity of quality data on rates of malnutrition among sex workers and effective interventions to improve their nutritional status and metabolic health.

The WHISPER (Women's Health Intervention Using SMS to Prevent Pregnancy) or SHOUT (SMS Intervention to improve nutritional Health OUTcomes) study will assess the effectiveness of two mobile phone-based health promotion interventions to reduce the incidence of unintended pregnancy, and the prevalence of anaemia respectively, among female sex workers in Mombasa, Kenya. The study is a collaboration between the International Centre for Reproductive Health (ICRH) in Kenya and the Burnet Institute in Australia, along with collaborating investigators from other institutions. It is funded by the National Health and Medical Research Council of Australia.

In phase 1 of the study, mHealth text messages for both the sexual and reproductive health (WHISPER) and nutrition (SHOUT) interventions were developed and tested in formative research with female sex workers (ethics approval for phase 1 provided by KNH UoN ERC and Monash University).

This is the protocol for phase 2, which will consist of a 12-month cluster-randomised controlled trial to assess the effectiveness of the SMS-based interventions. One group will receive the SRH intervention and the other will receive the nutrition intervention, with each acting as the equal attention control group for the other. Eligible women will be recruited from sex work venues (clusters) by well-established peer outreach workers. FSWs will be randomised to the SRH or nutrition intervention, with assessments conducted at baseline, six, and 12 months follow-up. Data collection will include semi-structured face-to-face interviews as well as anthropometry and biological testing for pregnancy, HIV, syphilis and nutritional health parameters (e.g. haemoglobin). A validation study called EYENAEMIA, which tests a novel technology for diagnosing anaemia, will be nested in the trial, with a separate consent process for interested participants.

In addition to the primary outcomes, a number of secondary outcomes will also be assessed. For WHISPER these include dual method and long-acting reversible contraceptive use, incidence of HIV, self-reported abortion and contraceptive knowledge score. For SHOUT, they include malnutrition by measured BMI, self-reported nutritious diet, and nutrition knowledge score.

As part of evaluating the feasibility and acceptability of the WHISPER intervention, qualitative interviews will be conducted at the conclusion of the study with a sample of

participants from the sexual and reproductive health arm, and their emotional partners. Interviews will explore positive and negative attributes of the SRH intervention, and explore in depth how it influenced the attitudes, behaviours and practices of female sex workers, and their relationship with their emotional partner(s).

If shown to be effective in this trial, mHealth interventions could be incorporated into broader SRH and/or nutrition strategies for FSWs in Africa and elsewhere, and have the potential to be scaled up for use with other women at a population level at low cost.

## 2 Acronyms and definitions

|         |                                                                                                                                                                                                                                                                                                         |
|---------|---------------------------------------------------------------------------------------------------------------------------------------------------------------------------------------------------------------------------------------------------------------------------------------------------------|
| AIDS    | Acquired Immunodeficiency Syndrome                                                                                                                                                                                                                                                                      |
| Anaemia | Haemoglobin level below the normal range.<br>Mild anaemia: haemoglobin of 10.0-11.9 g/dL (9.0-10.9 g/dL in pregnant women)<br>Moderate anaemia: haemoglobin of 8.0-9.9 g/dL (9.0-10.9 g/dL in pregnant women)<br>Severe anaemia: haemoglobin of 7.9 g/dL or below (6.9 g/dL or below in pregnant women) |
| BMI     | Body mass index                                                                                                                                                                                                                                                                                         |
| FP      | Family planning                                                                                                                                                                                                                                                                                         |
| FSW     | Female sex worker                                                                                                                                                                                                                                                                                       |
| GBV     | Gender based violence                                                                                                                                                                                                                                                                                   |
| Hb      | Haemoglobin                                                                                                                                                                                                                                                                                             |
| HIV     | Human Immunodeficiency Virus                                                                                                                                                                                                                                                                            |
| ICRH    | International Centre for Reproductive Health                                                                                                                                                                                                                                                            |
| LARC    | Long-acting reversible contraception                                                                                                                                                                                                                                                                    |
| MUAC    | Mid upper-arm circumference                                                                                                                                                                                                                                                                             |
| MCV     | Mean Cell Volume                                                                                                                                                                                                                                                                                        |
| NCD     | Non communicable disease                                                                                                                                                                                                                                                                                |
| O/O     | Overweight/Obesity                                                                                                                                                                                                                                                                                      |
| SRH     | Sexual and reproductive Health                                                                                                                                                                                                                                                                          |
| STI     | Sexually transmitted infection                                                                                                                                                                                                                                                                          |

|      |                                         |
|------|-----------------------------------------|
| SMS  | Short Message Service, or text messages |
| WASH | Water, sanitation and hygiene           |
| WHO  | World Health Organization               |

### 3 Investigators' signature page

"I have read this protocol and appendices and agree to conduct the trial as stipulated, and in compliance with all applicable regulations and guidelines."

#### Principal Investigator

Prof. **Peter Gichangi**, Principal Investigator, International Centre for Reproductive Health, Mombasa, Kenya

23/8/2016

.....  
Signed and dated

.....  
dd/mm/yyyy

#### Chief Investigators

Prof. **Walter Jaoko**, Chief Investigator, University of Nairobi, Kenya

23/8/2016

.....  
Signed and dated

.....  
dd/mm/yyyy

Prof. **Marleen Temmerman**, Chief Investigator, Aga Khan Foundation, Kenya

23/8/2016

.....  
Signed and dated

.....  
dd/mm/yyyy

Associate Prof. **Stanley Luchters**, Chief Investigator, Burnet Institute, Australia

23/8/2016.....

.....

Signed and dated dd/mm/yyyy

Dr. Megan Lim, Chief Investigator, Burnet Institute, Australia  
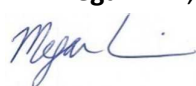  
..... 23/8/2016 Signed and dated  
dd/mm/yyyy

Prof. Margaret Hellard, Chief Investigator, Burnet Institute, Australia  
  
..... 23/8/2016 Signed and dated  
dd/mm/yyyy

Associate Prof. Mark Stoové, Chief Investigator, Burnet Institute, Australia  
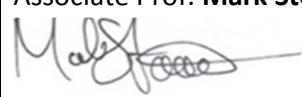  
23/8/2016.....  
Signed and dated dd/mm/yyyy

Associate Prof. Kelly L'Engle, Chief Investigator, University of San Francisco, USA  
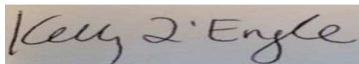  
..... 23/8/2016  
Signed and dated dd/mm/yyyy

Associate Prof. Matthew Chersich, Chief Investigator, University of the Witwatersrand, South Africa  
  
23/8/2016.....  
Signed and dated dd/mm/yyyy

**Co- Investigators**

**Mr Collins Mudogo**, co-investigator, ICRH, Kenya



23/8/2016.....

Signed and dated *dd/mm/yyyy*

**Dr Frances Ampt**, co-investigator, Burnet institute, Australia



23/8/2016.....

Signed and dated *dd/mm/yyyy*

**Mr Paul Agius**, Statistician and co-investigator, Burnet Institute, Australia



23/8/2016.....

Signed and dated *dd/mm/yyyy*

For peer review only

1  
2  
3  
4  
5  
6  
7  
8  
9  
10  
11  
12  
13  
14  
15  
16  
17  
18  
19  
20  
21  
22  
23  
24  
25  
26  
27  
28  
29  
30  
31  
32  
33  
34  
35  
36  
37  
38  
39  
40  
41  
42  
43  
44  
45  
46  
47  
48  
49  
50  
51  
52  
53  
54  
55  
56  
57  
58  
59  
60



#### 4 Contact details

|                                                                                           |                        |                                                                                    |
|-------------------------------------------------------------------------------------------|------------------------|------------------------------------------------------------------------------------|
| International Centre for Reproductive Health (ICRH), Kenya                                | Peter Gichangi         | e-mail: <a href="mailto:Peter@icrhk.org">Peter@icrhk.org</a>                       |
|                                                                                           | Collins Mukanya Mudogo | e-mail: <a href="mailto:CMudogo@icrhk.org">CMudogo@icrhk.org</a>                   |
| University of Nairobi, Kenya                                                              | Walter Jaoko           | e-mail: <a href="mailto:WJaoko@KAVIUON.ORG">WJaoko@KAVIUON.ORG</a>                 |
| Aga Khan University, Kenya                                                                | Marleen Temmerman      | e-mail: <a href="mailto:marleen.temmerman@ugent.be">marleen.temmerman@ugent.be</a> |
| Wits Reproductive Health and HIV Institute, University of the Witwatersrand, South Africa | Matthew Chersich       | e-mail: <a href="mailto:mchersich@wrhi.ac.za">mchersich@wrhi.ac.za</a>             |
| Burnet Institute, Australia                                                               | Stanley Luchters       | e-mail: <a href="mailto:sluchters@burnet.edu.au">sluchters@burnet.edu.au</a>       |
|                                                                                           | Megan Lim              | e-mail: <a href="mailto:lim@burnet.edu.au">lim@burnet.edu.au</a>                   |
|                                                                                           | Mark Stoove            | e-mail: <a href="mailto:stoove@burnet.edu.au">stoove@burnet.edu.au</a>             |
|                                                                                           | Margaret Hellard       | e-mail: <a href="mailto:hellard@burnet.edu.au">hellard@burnet.edu.au</a>           |
|                                                                                           | Frances Ampt           | e-mail: <a href="mailto:frances.ampt@burnet.edu.au">frances.ampt@burnet.edu.au</a> |
| University of San Francisco, USA                                                          | Kelly L'Engle          | e-mail: <a href="mailto:klengle@usfca.edu">klengle@usfca.edu</a>                   |

## 5 Table of Contents

|        |                                                                              |    |
|--------|------------------------------------------------------------------------------|----|
| 1      | Executive summary .....                                                      | 2  |
| 2      | Acronyms and definitions .....                                               | 3  |
| 3      | Investigators' signature page.....                                           | 4  |
| 4      | Contact details .....                                                        | 7  |
| 6      | Research outline .....                                                       | 10 |
| 7      | Background .....                                                             | 12 |
| 7.1    | Unmet need for family planning among women .....                             | 12 |
| 7.2    | Sexual and reproductive health of female sex workers.....                    | 13 |
| 7.3    | Malnutrition among adult women.....                                          | 13 |
| 7.3.1  | Dietary diversity and intake .....                                           | 15 |
| 7.3.2  | Iron deficiency.....                                                         | 16 |
| 7.4    | Nutritional health needs in Kenya.....                                       | 17 |
| 7.5    | Potential of mHealth to address barriers and promote healthy behaviours..... | 19 |
| 8      | Study rationale .....                                                        | 20 |
| 9      | Aims and study objectives .....                                              | 22 |
| 9.1    | Aims.....                                                                    | 22 |
| 9.2    | Objectives 1: Sexual and reproductive health intervention .....              | 22 |
| 9.2.1  | Primary SRH objective.....                                                   | 22 |
| 9.2.2  | Secondary SRH objectives.....                                                | 23 |
| 9.3    | Objectives 2: Nutrition intervention .....                                   | 23 |
| 9.3.1  | Primary nutrition objective.....                                             | 23 |
| 9.3.2  | Secondary nutrition objectives .....                                         | 23 |
| 10     | Study design and methods.....                                                | 24 |
| 10.1   | Study setting .....                                                          | 24 |
| 10.2   | Study design .....                                                           | 24 |
| 10.3   | Study population.....                                                        | 25 |
| 10.3.1 | Inclusion criteria.....                                                      | 25 |
| 10.3.2 | Exclusion criteria.....                                                      | 25 |
| 11     | Description of the intervention .....                                        | 27 |
| 11.1   | The sexual and reproductive health intervention.....                         | 28 |
| 11.2   | The nutrition intervention.....                                              | 29 |
| 12     | Study procedures .....                                                       | 30 |
| 12.1   | Randomisation .....                                                          | 30 |
| 12.2   | Pre-screening .....                                                          | 30 |
| 12.3   | Screening and enrolment procedures.....                                      | 31 |
| 12.4   | Follow-up visits (month 6 and 12).....                                       | 32 |
| 12.5   | Unscheduled visits.....                                                      | 33 |

|    |        |                                                        |
|----|--------|--------------------------------------------------------|
| 1  |        |                                                        |
| 2  |        |                                                        |
| 3  | 12.6   | Data collection procedures ..... 33                    |
| 4  | 12.6.1 | Structured face-to-face interviews ..... 34            |
| 5  |        |                                                        |
| 6  | 12.6.2 | Clinical examinations ..... 34                         |
| 7  |        |                                                        |
| 8  | 12.6.3 | Biological investigations ..... 37                     |
| 9  |        |                                                        |
| 10 | 12.6.4 | Participant follow-up ..... 40                         |
| 11 | 12.6.5 | Referral to services and treatment of anaemia ..... 40 |
| 12 | 12.7   | Participant withdrawal ..... 40                        |
| 13 | 13     | Data management and statistical analysis ..... 42      |
| 14 |        |                                                        |
| 15 | 13.1   | Sample size ..... 42                                   |
| 16 | 13.2   | Statistical analysis and reporting ..... 43            |
| 17 |        |                                                        |
| 18 | 14     | Ethical considerations ..... 46                        |
| 19 |        |                                                        |
| 20 | 14.1   | Consent ..... 46                                       |
| 21 | 14.2   | Confidentiality ..... 46                               |
| 22 | 14.3   | Risks ..... 46                                         |
| 23 | 14.4   | Benefits ..... 47                                      |
| 24 | 15     | Study limitations ..... 48                             |
| 25 |        |                                                        |
| 26 | 16     | Qualitative assessment of SRH intervention ..... 49    |
| 27 |        |                                                        |
| 28 | 16.1   | Qualitative research specific objectives ..... 49      |
| 29 | 16.1.1 | Qualitative research questions ..... 49                |
| 30 |        |                                                        |
| 31 | 16.2   | Qualitative research methods ..... 51                  |
| 32 | 16.2.1 | Qualitative study design ..... 51                      |
| 33 | 16.2.2 | Data analysis ..... 51                                 |
| 34 | 16.2.3 | Ethical issues ..... 51                                |
| 35 |        |                                                        |
| 36 | 17     | Timeline ..... 53                                      |
| 37 |        |                                                        |
| 38 | 18     | Budget ..... 53                                        |
| 39 |        |                                                        |
| 40 | 19     | Annexes ..... 54                                       |
| 41 |        |                                                        |
| 42 | 20     | References ..... 55                                    |
| 43 |        |                                                        |
| 44 |        |                                                        |
| 45 |        |                                                        |
| 46 |        |                                                        |
| 47 |        |                                                        |
| 48 |        |                                                        |
| 49 |        |                                                        |
| 50 |        |                                                        |
| 51 |        |                                                        |
| 52 |        |                                                        |
| 53 |        |                                                        |
| 54 |        |                                                        |
| 55 |        |                                                        |
| 56 |        |                                                        |
| 57 |        |                                                        |
| 58 |        |                                                        |
| 59 |        |                                                        |
| 60 |        |                                                        |

## 6 Research outline

|                                   |                                                                                                                                                                                                                                                                                                                                                                                                                                                                                                                                  |                                                                                                                                                                                                                                                                                                                   |
|-----------------------------------|----------------------------------------------------------------------------------------------------------------------------------------------------------------------------------------------------------------------------------------------------------------------------------------------------------------------------------------------------------------------------------------------------------------------------------------------------------------------------------------------------------------------------------|-------------------------------------------------------------------------------------------------------------------------------------------------------------------------------------------------------------------------------------------------------------------------------------------------------------------|
| Aim:                              | <p>The overall aim is to improve the health and wellbeing of female sex workers in resource-constrained settings. This study assesses the effectiveness of two mobile phone delivered interventions and aims to:</p> <ol style="list-style-type: none"> <li>1) improve the sexual and reproductive health of female sex workers (as compared to women receiving a nutrition intervention), and</li> <li>2) improve the nutritional status of female sex workers (as compared to women receiving an SRH intervention).</li> </ol> |                                                                                                                                                                                                                                                                                                                   |
| Study objectives                  | 1 - SRH intervention                                                                                                                                                                                                                                                                                                                                                                                                                                                                                                             | 2 - Nutrition intervention                                                                                                                                                                                                                                                                                        |
| Primary objective:                | To assess the effectiveness of a 12-month mobile phone-based sexual and reproductive health promotion intervention to reduce the incidence of unintended pregnancy among FSWs in Kenya.                                                                                                                                                                                                                                                                                                                                          | To assess the effectiveness of a 12-month mobile phone-based nutritional health promotion intervention on nutritional status (particularly anaemia) among FSWs in Kenya.                                                                                                                                          |
| Primary study endpoint:           | Incidence of unintended pregnancy over 12 months of follow-up.                                                                                                                                                                                                                                                                                                                                                                                                                                                                   | Nutritional status and prevalence of anaemia (Hb<12.0g/dL) at 12 months of follow-up.                                                                                                                                                                                                                             |
| Secondary Objectives:             | <ol style="list-style-type: none"> <li>i) to assess the feasibility and acceptability of the mobile phone delivered sexual and reproductive health intervention</li> <li>ii) to assess the effectiveness of the intervention at reducing HIV and syphilis incidence</li> <li>iii) to assess the effectiveness of the intervention at improving contraceptive knowledge (median knowledge score).</li> </ol>                                                                                                                      | <ol style="list-style-type: none"> <li>i) to assess the feasibility and acceptability of the mobile phone delivered nutrition intervention</li> <li>ii) to assess performance, feasibility and acceptability of a mobile phone administered application (Eyenaemia) for measuring anaemia (sub-study).</li> </ol> |
| mHealth intervention description: | The intervention addresses knowledge of contraceptive options and their effectiveness and safety, and improvements in sexual and reproductive health self-efficacy, particularly through the promotion of long-acting reversible contraceptive methods and injectable contraception (non-user-dependent methods).                                                                                                                                                                                                                | The nutritional health promotion intervention promotes positive knowledge, attitudes and practices regarding locally applicable actions, which could improve nutritional status of women of childbearing age.                                                                                                     |

|                               |                                                                                                                                                                                                                                                                                                                                                                                                                            |
|-------------------------------|----------------------------------------------------------------------------------------------------------------------------------------------------------------------------------------------------------------------------------------------------------------------------------------------------------------------------------------------------------------------------------------------------------------------------|
| mHealth intervention delivery | <p>Mobile phone delivered health promotion intervention consisting of:</p> <ul style="list-style-type: none"> <li>* health messages sent through a series of SMS;</li> <li>* theory-guided role model stories available as phone messages promoting positive norms and attitudes, and increased self-efficacy for healthier behaviour;</li> <li>* on-demand system for more detailed SMS delivered information.</li> </ul> |
| Design:                       | <p>Two-arm cluster randomised controlled trial with women recruited from 86 sex work venues;</p> <p>Qualitative inquiries consisting of in-depth interviews will be conducted to assess secondary objectives with regards to feasibility and acceptability of the intervention.</p>                                                                                                                                        |
| Location                      | Mombasa County, Coast Region, Kenya.                                                                                                                                                                                                                                                                                                                                                                                       |
| Study population              | Women in the study areas, aged 16 years or older, who self-report receiving money in exchange for sex in the last six months, not currently pregnant, and not planning a pregnancy in the next 12 months.                                                                                                                                                                                                                  |
| Study size                    | 860 female sex workers (430 women per arm) enrolled from 86 female sex worker venues. In total an estimated 40 in-depth interviews will be conducted.                                                                                                                                                                                                                                                                      |
| Study duration                | 6-month enrolment period with 12-months follow-up.                                                                                                                                                                                                                                                                                                                                                                         |

## 7 Background

### 7.1 Unmet need for family planning among women

Contraception has profound benefits for women and society, including reduced maternal and infant mortality and morbidity, empowerment of women to make informed choices about fertility, economic advancement, and a reduction in the number of children infected with HIV (Feucht, Meyer et al. 2014; Michalow, Chola et al. 2015). In recent decades, contraceptive use has risen markedly worldwide, though at a much slower pace in sub-Saharan Africa than elsewhere (Cleland, Harbison et al. 2014). About a quarter of women in sub-Saharan Africa currently use modern contraceptive methods, with levels highest in southern Africa (United Nations (UN) Department of Economic and Social Affairs Population Division 2013; Darroch and Singh 2013). In South Africa, for example, estimates of the proportion of women of reproductive age who are protected against unplanned pregnancies using modern contraceptive methods have increased steadily from 26.3% in 2002/03 to 37.3% in 2013/14 (Massyn, Day et al. 2014). However, the continued rise in the number of terminations of pregnancy in the country and elsewhere, among all age groups, suggests that substantial deficiencies remain in access to family planning services (Massyn, Day et al. 2014).

Increasing the range of contraception choices available is a key component of ensuring access for women, their partners and for couples, to the most effective method they wish to use. Particular emphasis has been placed on raising access to long-acting reversible contraception (LARC) methods, including intrauterine devices and subdermal implants. These are highly effective, and markedly diminish the need for user adherence and contact with health workers. Many health providers, however, still unfamiliar with these methods (Gutin, Mlobeli et al. 2011; Morse, Chipato et al. 2013; Blanchard, Chipato et al. 2014). Throughout sub-Saharan Africa, the injectable progestins depot-medroxyprogesterone acetate (DMPA) and norethisterone enanthate (NET-EN) are the most popular modern contraceptive methods (Darroch and Singh 2013). About 5.8 million doses of DMPA are administered annually (Massyn, Day et al. 2014). Its use has continued to rise over time in Southern and Eastern Africa (Ross and Agwanda 2012). By contrast, in most high-income countries, use of injectable contraceptives is rare, aside from in marginalised groups, such as poor, non-white or Aboriginal women (Tait 2000; Smith 2003; Metoyer 2009; Volscho 2011). The popularity of injectables in sub-Saharan Africa is ascribed to its convenience for providers and women, cost effectiveness, and high acceptability among women and health providers (Michalow, Chola et al. 2015). Method discontinuation and contraceptive failure are, however, frequent with this method (Baumgartner, Morroni et al. 2007; Smit and Beksinska 2013).

MHealth interventions for SRH often face a challenge in providing uncontroversial information on “safe” topics, “topics about mothers and feel-good sensations”, and covering

1  
2  
3 more controversial or even taboo topics (Waldman and Stevens 2015). As an overarching  
4 principle, it is important to tackle the issues that constitute barriers to care, even those that  
5 are more complex and difficult to handle. Such topics include health care workers' abuse  
6 and disrespect, as well as how women might deal with an unintended pregnancy and its  
7 consequences (Waldman and Stevens 2015). It is thus important to measure factors  
8 influencing the supply of family planning services, not just demand for them.  
9  
10

## 11 12 13 **7.2 Sexual and reproductive health of female sex workers**

14  
15 Reducing unmet need for contraception could prevent 52 million unintended pregnancies,  
16 70,000 maternal deaths, and 500,000 newborn deaths annually (Singh, Darroch et al. 2014).  
17 Unmet need is a particular concern for female sex workers (FSWs), with approximately one  
18 quarter of FSWs in Kenya experiencing an unintended pregnancy each year (Chersich, Bosire  
19 et al. 2014). Given the very high rates of HIV in this population in sub-Saharan Africa  
20 (Scorgie, Chersich et al. 2012), sexually transmitted infection (STI) prevention has been the  
21 primary aim of health promotion. This vertical approach, however, has largely overlooked  
22 FSWs' broader reproductive health needs.  
23  
24  
25

26  
27 With nearly one in 20 women in sub-Saharan Africa engaged in sex work (Vandepitte, Lyerla  
28 et al. 2006), FSWs constitute a large, vulnerable, hard-to-reach population. Mobile phones  
29 offer a promising means of accessing this population given their high penetration in Kenya  
30 and among FSWs in particular (ITU 2016), (Vahdat, L'Engle et al. 2013). Health promotion  
31 delivered through mobile phones has the potential to reach a large number of at-risk  
32 women at low cost, and address known barriers to contraceptive use including lack of  
33 knowledge and misconceptions (Sutherland, Alaii et al. 2011). RCTs among young people in  
34 Australia demonstrate that mHealth interventions can increase SRH knowledge and service  
35 uptake (Gold, Aitken et al. 2011; Lim, Hocking et al. 2012). No trials have yet been published  
36 on the impacts of mHealth on SRH among sex workers or in low income countries.  
37  
38  
39  
40  
41

## 42 43 **7.3 Malnutrition among adult women**

44  
45 Investing in nutrition is as much an issue of health, of care, and of food sovereignty, as it is  
46 of human rights, of economic welfare, and of social protection. Nutrition should be central  
47 to all renewed commitments to realise the Sustainable Development Goals (SDGs)(United  
48 Nations Development Programme 2015).  
49

50  
51 Worsening food insecurity in urban poor settings in SSA is one of the leading direct and  
52 indirect causes of morbidity and mortality among women and children. The nature, extent  
53 and duration of coping strategies to food insecurity in urban settings by women, determine  
54 the magnitude and severity of their suffering and that of their children (Kimani-Murage,  
55 Schofield et al. 2014). Studies in many countries including Kenya, Ethiopia, Swaziland, Brazil,  
56 and Nigeria indicate that hunger is a key factor pushing women into sex work (Hampanda  
57  
58  
59  
60

2013; Njue, Voeten et al. 2011; Fielding-Miller, Minisi et al. 2014; Oyefara 2007; Moret 2014). Food insecurity has been linked to not only lead women into sex work but also increase their chances of engaging in risky sexual behaviours for survival (Tsai, Hung et al. 2012). Micronutrients deficiency is known to have staggering consequences for human health and well-being as well as hampering economic productivity. In women of reproductive ages, micronutrients deficiency lead to increased pregnancy complications and maternal mortality (Children's Investment Fund Foundation 2013; Stoltzfus and Dreyfuss n.d.; World Health Organization & Food and Agricultural Organization of the United Nations n.d.). On the other hand, overweight and obesity causes poor health, negatively affects quality of life and shortens the quantity of life. Uniquely in women, obesity causes conditions such as osteoarthritis, birth defects, breast and endometrial cancers, cardiovascular and gall bladder diseases, infertility, gynaecological complications, urinary stress incontinence, stigma and discrimination (Mbochi, Kuria et al. 2012).

Food security is based on four main processes, including food availability, food access, food utilisation, and food stability (Gross, Schoeneberger et al. 2000; Fanzo 2012). The 2011 National Food and Nutrition Policy in Kenya highlights four broad objectives including; to achieve good nutrition for optimum health of all Kenyans, to increase the quantity and quality of food available, accessible and affordable to all Kenyans, to protect vulnerable populations using innovative and cost-effective safety nets linked to long term development (Government of Kenya Agricultural Sector Coordination Unit 2011). In essence, it is important to conceptualise nutrition beyond just the aspects of food intake, absorption and metabolism, hence consider the balance between what is eaten vis-a-vis what the body requires (African Union 2005).

Using the concept of hidden hunger, which is associated with micronutrient deficiencies, the Food and Agricultural Organization (FAO) estimates that 850 million people across the world are hungry. FAO states that malnutrition is purported to affect up to a half of the world's population (Henson and Humphrey 2013). Iron deficiency is the most prevalent single nutrient deficiency affecting an estimated 2 billion people worldwide. Iron deficiency and anaemia are known to be most prevalent in developing countries. Although Iron deficiency can occur at any stage in a life cycle (World Health Organization 2001), the most vulnerable groups include women and children. Globally 469 million women of reproductive age are anaemic with at least 50% of this resulting from dietary iron deficiency (Oldewage-Theron et al. 2014). In South Africa, studies have reported iron deficiency in 7-29% of pregnant women, 57% in pregnant teenage girls, 21% in infants and 26% in non-pregnant teenage girls (Aderibigbe 2011). In many SSA countries, including Kenya, under nutrition is associated with wide spread micronutrient deficiencies (Rohner et al. 2016; Amuyunzu-Nyamongo 2011; Fanzo 2012; Claxton n.d.; Dixon, Omwenga et al. 2007; Kimani-Murage et al. 2015).

Women and children within settings of high vulnerability to food security are more likely to rely on pre-prepared and street based high energy dense foods which predispose them to



1  
2  
3 obesity. Moreover access to low quality food, limited in dietary diversity may lead to  
4 obesity, conditions typical of the urban poor women and children in many Kenya (Kimani-  
5 Murage, Muthuri et al. 2015).  
6

7  
8 While Kenya's overall budget has increased over time, budgetary allocation for food security  
9 and agriculture has remained lower than the minimum recommended 10% by the African  
10 Union meeting in Maputo in 2003 (FAO 2015). For example in the 2015/16 budget, worth 2  
11 trillion, food and agriculture were only allocated 43.3 billion translating to about 4.3%. This  
12 is despite the rapidly rising food inflation in the country (Republic of Kenya Parliamentary  
13 Service Commission & Parliamentary Budget Office 2015). In finding solutions to the already  
14 overburdened resource constraint healthcare systems in SSA, it is important to appreciate  
15 that long-term health outcomes are shaped by factors largely outside of the health system  
16 such as lifestyle, diet and nutritional levels and education (National Planning Commission  
17 2012).  
18  
19  
20  
21  
22  
23

### 24 **7.3.1 Dietary diversity and intake**

25  
26 A variety of foods in the diet is needed to ensure an adequate intake of essential nutrients.  
27 Dietary diversity can be used as a proxy measure of the nutritional quality of a population's  
28 diet, as well as an indicator of the access dimension of household food security (Kennedy,  
29 Pedro et al. 2009). Populations consuming a diet of low dietary diversity are nutritionally  
30 vulnerable (Kennedy, Pedro et al. 2009).  
31  
32

33 In measures of diversity, participants are asked to recall all foods and drinks consumed the  
34 previous day. These food items were then allocated to specific food groups. A dietary  
35 diversity score (DDS) is calculated by summing the number of food groups from which food  
36 had been consumed; the nine food groups were cereals, roots and tubers; vitamin A-rich  
37 vegetables and fruit; vegetables other than vitamin A is rich; fruit other than vitamin A-rich  
38 fruit; meat, poultry, and fish; eggs; legumes; dairy products; and foods made with fats or  
39 oils. Each food group was counted only once. A DDS below four is considered to be low and  
40 to be associated with dietary inadequacies (Steyn 2006) .  
41  
42  
43

44 No single food contains all required nutrients for optimal health. Consequently, the more  
45 food groups included in a daily diet, the greater the likelihood of meeting nutrient  
46 requirements (Kennedy, Pedro 2009) . Monotonous diets, based mainly on starches such as  
47 maize, rice and bread, have been closely associated with food insecurity. Dietary diversity is  
48 an outcome measure of food security at the individual or household level (Kennedy 2009) .  
49 Apart from reflecting on food security, low dietary diversity has also been associated with  
50 low weight and stunted growth (Rah 2010) #30} , cardiovascular risk (Azadbakht  
51 2006)dyslipidaemia (Li, Wedick et al. 2011), as well as a risk factor for the metabolic  
52 syndrome (Azadbakht 2006).  
53  
54  
55  
56  
57  
58  
59  
60

1  
2  
3 The increase in the prevalence of chronic diseases in the developing world is largely  
4 attributed to changes in lifestyle associated with globalisation and urbanisation (WHO  
5 2003). Studies from populations throughout the world have demonstrated a strong  
6 association of obesity with chronic NCDs, especially type 2 diabetes, and cardiovascular  
7 diseases (Popkin 2002). A high energy intake is one of the main risk factors for obesity in  
8 both children and adults. This, together with a high total fat intake, high saturated fat  
9 intake, high refined carbohydrate and added sugar intake, low fibre intake and low intake of  
10 fruits and vegetables, has been classified as a typical 'western diet' which contributes to the  
11 development of chronic diseases. This process has been described by many as the nutrition  
12 transition (Popkin 2002).  
13  
14  
15  
16

17 The field of anthropometry encompasses a variety of human body measurements, such as  
18 weight, height, and size, including skinfold thicknesses, and circumferences. In adults, body  
19 measurement data are used to evaluate health and dietary status, disease risk, and body  
20 composition changes that occur over the adult lifespan. Anthropometry provides the single  
21 most portable, universally applicable, inexpensive and non-invasive technique for assessing  
22 the size, proportions, and composition of the human body. It reflects both health and  
23 nutritional status and predicts performance, health and survival. As such, it is a valuable tool  
24 for guiding public health policy and clinical decisions (WHO1995). The body mass index  
25 (BMI) is a measure of nutritional status that combines weight with height data. It provides  
26 an acceptable approximation for assessment of total body fat and is a fairly reliable  
27 indicator of body fat for most adults, with athletes and the elderly being two exceptions.  
28 The BMI has been considered to be the most appropriate and simple indicator by which  
29 weight-for-height can be related to health outcomes. It is widely acknowledged that the risk  
30 of illness increases with modest increases in weight, starting from a BMI of about 21 kg/m<sup>2</sup>  
31 (Rigby 2006). Alternative measures that reflect abdominal adiposity, such as waist  
32 circumference, waist-hip ratio and waist-height ratio, have been suggested as being  
33 superior to BMI in predicting cardiovascular disease (CVD) risk (WHO 2011). This is based  
34 largely on the rationale that increased visceral adipose tissue is associated with a range of  
35 metabolic abnormalities, including decreased glucose tolerance, reduced insulin sensitivity  
36 and adverse lipid profiles, which are risk factors for type 2 diabetes and cardiovascular  
37 disease (CVD). Waist-hip ratio (the waist circumference divided by the hip circumference)  
38 can be measured more precisely than skin folds, and it provides an index of both  
39 subcutaneous and intra-abdominal adipose tissue.  
40  
41  
42  
43  
44  
45  
46  
47  
48

### 49 **7.3.2 Iron deficiency**

50 Because anaemia is the most common indicator used to screen for iron deficiency, the  
51 terms anaemia, iron deficiency, and iron deficiency anaemia are often used interchangeably.  
52 According to WHO, iron deficiency is the most common nutritional disorder in the world. It  
53 affects at least half of all pregnant women and young children in developing countries. Iron  
54 deficiency often results from a lack of bioavailable iron in the diet, but also can occur during  
55 a period of rapid growth (pregnancy and infancy), when the body needs more iron. Another  
56  
57  
58  
59  
60

1  
2  
3 common cause is increased blood loss, such as gastrointestinal bleeding due to hookworm  
4 or urinary blood loss due to schistosomiasis.  
5

6 Multiple causes of anaemia can coexist in an individual or populations and contribute to its  
7 severity; however, the most common cause of anaemia is iron deficiency. Among adults,  
8 anaemia is a serious risk to mothers in childbirth: every day some 140 women die in  
9 childbirth because of severe anaemia. Although some functional consequences may be  
10 observed in individuals who have iron deficiency without anaemia, cognitive impairment,  
11 decreased physical capacity and reduced immunity are commonly associated with iron  
12 deficiency anaemia. In severe iron deficiency anaemia, capacity to maintain body  
13 temperature may also be reduced. Severe anaemia is also life threatening. Because anaemia  
14 can contribute to maternal mortality, infant morbidity, infant mortality, intrauterine growth  
15 retardation and low birth weight, WHO recommends screening of all pregnant women for  
16 anaemia. Iron deficiency has also been associated with overweight and obesity (Bougle and  
17 Brouard 2013; Oldewage-Theron, Egal et al. 2014; Aderibigbe 2011; Bouglé & Torheim,  
18 Elaine et al. 2010)  
19  
20  
21  
22  
23

#### 24 ***Clinical signs and biochemical test for anaemia***

25  
26 Using clinical pallor of the nails or eyes (inferior conjunctiva) to diagnose anaemia on a  
27 population basis should be avoided because these clinical signs are very subjective and not  
28 precise. Haemoglobinometers, such as the HemoCue is a more reliable and easy method is  
29 to test the haemoglobin concentration in the blood (World Food Programme 2005).  
30 Compared to the HemoCue method, an objective method, the haemoglobin colour scale  
31 and the Sahli method have low accuracy (World Food Programme 2005; M'Baya, Mbingwani  
32 et al. 2014). They are not recommended in research or field surveys of nutrition (World  
33 Food Programme 2005).  
34  
35  
36

37 The World Health Organization defines anaemia as Hb < 12.0g/dL (<11g/dL for pregnant  
38 women), and severe anaemia as Hb < 8.0g/dL (<7g/dL for pregnant women) (WHO 2015). In  
39 clinical practice in Kenya, anaemia is generally defined as Hb < 10.0g/dL (Republic of Kenya  
40 2009); however this study will be adopting the World Health Organization definition.  
41  
42  
43  
44

#### 45 **7.4 Nutritional health needs in Kenya**

46  
47 The National Food and Nutrition Security Policy of 2011 states that all Kenyans should at all  
48 times have access to safe food of sufficient quantity and quality to satisfy their nutritional  
49 needs for optimal health. Although research in many countries show that food insecurity  
50 and poor diets have been associated with entry into sex work and relatively high propensity  
51 of engaging in unprotected sex (Moret 2014; Neal, Schrader et al. 2014; Tsai, Hung et al.  
52 2012), we could not locate any data on nutritional assessment of FSWs in Kenya, and thus  
53 provide a background on nutrition in Kenya as a whole. Clearly, this study will provide much  
54 useful information on nutrition among the FSW population in the country.  
55  
56  
57  
58  
59  
60

1  
2  
3 In the Kenya 2014 Demographic and Health Survey, the majority of households (89 percent)  
4 had acceptable food consumption scores (KDHS 2014). The food consumption score, derived  
5 from the household consumption history questions, is a composite calculation including  
6 dietary diversity (the number of food groups consumed by a household over a seven-day  
7 period), food frequency (the number of days a particular food group is consumed), and the  
8 relative nutritional importance of different food groups. The score is intended to describe  
9 short-term food security at the time of data collection. Food consumption scores are divided  
10 into poor, borderline, and acceptable food consumption groups. Two percent of households  
11 had poor food consumption scores and 10 percent had borderline scores.

12  
13  
14  
15  
16 Kenya's nutritional profile indicates that iron and Vitamin A deficiencies are the most  
17 prevalent in the country. For example in 1999, just over half (55%) of pregnant women and  
18 just below one half, 47.9% of non-pregnant women suffered from iron deficiency anaemia.  
19 In 2011, 36% of pregnant women were estimated to have blood haemoglobin concentration  
20 of less than 11g/dl while 25 % of non-pregnant women were estimated to have blood  
21 haemoglobin concentration of less than 12g/dl (WHO 2015). Approximately 40% of women  
22 experience vitamin A deficiency. 17% of pregnant women in Kenya are Vitamin A deficient  
23 with about 52% of mothers being zinc deficient. Although there is a dearth of information,  
24 iodine deficiency disorders are still prevalent in Kenya (Muthoni 2014).

25  
26  
27  
28  
29 Overweight and Obesity (O/O) are modifiable risk factors for the development of non-  
30 communicable diseases (NCDs). With the current increasing rates in O/O of about 5% per  
31 year across SSA, there are high predictions of accompanying increase in NCDs and diabetes  
32 mellitus 2. Across SSA, the prevalence of overweight/obesity appear to be most visible  
33 among populations in urban settings. Factors such as dependence on ready and fast foods,  
34 reduced physical activity, imbalanced diet, and poverty, seem to predispose urban poor  
35 populations to O/O more than their rural counterparts (Kimani-Murage 2013; Mohiddin,  
36 Phelps et al. 2012). A study in the poor urban slums of Nairobi confirmed the existence of  
37 the double burden of malnutrition in such settings in Kenya. In that study 7.5% mothers  
38 were underweight while 32% were obese. Interestingly, a large proportion, 43% and 37% of  
39 the overweight and obese mothers respectively had stunted children (Kimani-Murage,  
40 Muthuri et al. 2015). O/O are usually more prevalent in women specifically in the 25 to 40  
41 age range. This is mainly attributable to the retention of gestational weight gain and also the  
42 outcome of numerous lifestyle factors such poor diets, inactive lifestyles, urbanisation and  
43 adoption of diets that veer away from traditional menus (Mbochi, Kuria et al. 2012).

44  
45  
46  
47  
48  
49 Female sex workers in Mombasa are vulnerable to poor nutritional status due to many  
50 historical, social, economic and environmental factors. The SHOUT study will elicit  
51 reflections on the need to think about nutrition among FSW. The SHOUT study has been  
52 designed to promote knowledge and information, that can holistically improve nutrition  
53 status among female sex workers by influencing their attitudes and practices towards better  
54 food purchasing practices, better methods of food storage, better methods of food  
55 preparation, better diets, better eating habits and improved hygiene.

## 7.5 Potential of mHealth to address barriers and promote healthy behaviours

Mobile technology interventions hold enormous promise for health promotion. One of the most popular communication technologies is short message service (SMS), also known as text messaging. SMS has many advantages over other modes of communication. SMS is transmitted between mobile phones, so is not dependent on fixed lines or non-portable equipment and can be received anywhere. It is fast, with transmitted messages being received almost instantaneously. It is convenient; a message can be stored in the phone until the recipient is ready to read it and when saved in the phone, the recipient can refer to it at any time. It can be anonymous; the sender and recipient do not have to reveal anything about themselves other than their mobile number, and recipients can choose to ignore or respond to a message after reading its content. It is highly cost-effective; sending a text message costs less than a fixed-line local phone call and messages can be sent to many recipients at once. Direct evidence for the effectiveness of SMS health promotion interventions is rapidly evolving.

Three recent systematic reviews have shown that SMS interventions influence behaviour change and can successfully promote health seeking, (Fjeldsoe, Marshall et al. 2009, Cole-Lewis and Kershaw 2010; Free, Phillips et al. 2013) including for sexual health and diet. A series of randomised-controlled trials in Australia that demonstrated improvements in sexual health outcomes following an SMS intervention (Gold, Aitken et al. 2011; Gold, Lim et al. 2011; Lim, Hocking et al. 2012). Importantly, this research showed that, in response to regular SMS and email messages, young women (in comparison to men) were particularly sensitive to improved their health seeking behaviour including being significantly more likely than controls to have an STI test or talk to their doctor about sexual health (Lim, Hocking et al. 2012). Trials in high income countries have also demonstrated the efficacy of SMS for changing diet behaviours (Nguyen, Kornman et al. 2011).

In developing countries, mobile phones are an increasingly important means of communication with broader reach and penetration than any other forms such as fixed line phones, radio, television or the internet (International Telecommunication Union 2014). Worldwide, around 80% of people living in developing countries own a mobile phone, making SMS a feasible and scalable method of health promotion in resource-poor settings. Kenya is a leader among developing economies in mobile technology for development (International Telecommunication Union 2014).

Formative qualitative research in Mombasa showed that mobile phones are essential and ubiquitous items for FSW. Most reported frequent text messaging, with 20-100 messages per day used to communicate with clients, friends and family, and for generating business. FSW reported not sharing phones with others and considered them as among their most valuable possessions; most FSW protected their phones because they kept their life savings

1  
2  
3 on them with mPesa (a mobile finance system in Kenya). Importantly, Mombasa-based FSW  
4 indicated interest in receiving health messages on their phones, even multiple times per  
5 day, as long as they did not have to pay for them. Research with FSW in Dar es Salaam,  
6 found that 94% of women indicated they 'would definitely pay attention to health texts'  
7  
8 (L'Engle, Vahdat et al. 2013).  
9

## 10 11 12 **8 Study rationale** 13

14 FSWs are at considerable risk of unintended pregnancies, which contribute substantially to  
15 maternal and perinatal morbidity and mortality, and socioeconomic vulnerability. Public  
16 health interventions that increase uptake of family planning methods among FSWs, with an  
17 emphasis on dual method use, could markedly benefit this population. FSWs constitute a  
18 large, vulnerable, hard-to-reach population that could be amenable to mHealth  
19 interventions given their high mobile phone coverage. There is promising evidence that  
20 health promotion messages using mobile phones are effective and offer a feasible means of:  
21 improving FSW knowledge of contraceptive options; modifying attitudes towards  
22 contraception; increasing reproductive health self-efficacy; raising uptake and utilisation of  
23 family planning methods; and consequently reducing unintended pregnancy.  
24  
25  
26  
27

28 Despite these potential gains and the proliferation of mHealth activities, there remains a  
29 lack of rigorous academic research in this emerging field, particularly which evaluates sexual  
30 and reproductive health promotion initiatives in resource-constrained settings (Lim, Hocking  
31 et al. 2008, Gold, Lim et al. 2011; Free, Phillips et al. 2013). A recent review of mHealth  
32 interventions found that although use of these technologies is increasing rapidly, research is  
33 failing to keep up (Free, Phillips et al. 2013).  
34  
35  
36

37 The WHISPER study has been developed in response to the substantial SRH needs of FSWs in  
38 Kenya, the potential gains offered by increasing demand for family planning among FSWs  
39 through mHealth, and the research gaps in this field. In addition, the nutrition (comparison)  
40 arm of the trial has arisen out of a growing acknowledgement of the need to improve  
41 nutrition in this population, and the paucity of quality data on rates of malnutrition among  
42 sex workers and effective interventions to improve their nutritional status and metabolic  
43 health.  
44  
45  
46

47 The WHISPER mobile messages have been developed in a systematic and participatory  
48 manner, to ensure that the intervention is grounded in evidence and health promotion  
49 theory, relevant and acceptable to the study population, and culturally appropriate.  
50 Evidence shows that theory-driven, interactive communication interventions that follow  
51 best practices in design and implementation can change attitudes and behaviours (Noar,  
52 Palmgreen et al.). A randomised controlled trial with an equal-attention control and  
53 objective biological primary outcome (unintended pregnancy) is the most robust study  
54 design to test the effectiveness of this intervention.  
55  
56  
57  
58  
59  
60

1  
2  
3 Development of the messages and role model stories for the SHOUT intervention was  
4 systematic and involved intensive and extensive formative research with the female sex  
5 workers population. Through a total of 10 workshops, female sex workers were involved in  
6 identifying important nutrition issues that affect them, developing of the messages and role  
7 model stories, reviewing and refining of the messages and role model stories, and generally  
8 in providing suggestions on the intervention architecture. This was in an effort to develop a  
9 relevant, acceptable and culturally appropriate intervention that is theory based. Key  
10 theories, models and processes of nutrition education underpin the importance for  
11 programs to improve knowledge, change attitudes and practices, with the understanding  
12 that behaviour change is a process and not an event, among individuals and communities to  
13 be able to promote sustainable positive behaviour changes (California WIC Program 2002).  
14  
15 If shown to be effective in this trial, mHealth could be incorporated into broader SRH and/or  
16 nutrition strategies for FSWs in Africa and elsewhere, and has the potential to be scaled up  
17 for use with other women at a population level.  
18  
19  
20  
21  
22  
23  
24  
25  
26  
27  
28  
29  
30  
31  
32  
33  
34  
35  
36  
37  
38  
39  
40  
41  
42  
43  
44  
45  
46  
47  
48  
49  
50  
51  
52  
53  
54  
55  
56  
57  
58  
59  
60

## 9 Aims and study objectives

### 9.1 Aims

The aim of the study is to improve the health and wellbeing of female sex workers in resource constrained settings.

More specifically, this study aims to:

- i) improve the sexual and reproductive health of female sex workers (as compared to women receiving a nutrition intervention), and
- ii) improve the nutritional status of female sex workers (as compared to women receiving an SRH intervention).

### 9.2 Objectives 1: Sexual and reproductive health intervention

#### 9.2.1 Primary SRH objective

The primary objective of the SRH intervention is to assess the effectiveness of a 12-month mobile phone-based sexual and reproductive health promotion intervention in reducing the incidence of unintended pregnancy among FSWs in Kenya.

##### **Primary SRH endpoint (relating to primary SRH objective)**

1. Incidence of unintended pregnancy among study participants over 12 months of follow-up.

An unintended pregnancy is defined as one that is mistimed, unplanned, or unwanted at the time of conception. Women will be asked about their pregnancy intentions for the next 6 months at their baseline, and 6 and 12 month visits. A psychometrically-validated 6-item questionnaire (London Measure of Unintended Pregnancy) is used to score pregnancy intention in cases of pregnancy occurring during study follow-up. (Barrett, Smith et al. 2004) Pregnancy will be defined as either a self-reported pregnancy (confirmation not required) or as a result of urine pregnancy screening which is planned for at the 6 and 12 month visits, or at unscheduled study visits should these occur.

##### **Secondary SRH endpoints (relating to primary SRH objective)**

2. Proportion of female sex workers reporting the use of modern contraceptive methods **and** condoms consistently (dual protection) in past month with all partner types;
3. Proportion of female sex workers reporting the use of long-acting reversible contraceptive methods or injectable contraceptives at month 6 and month 12;
4. Incidence of self-reported abortion among study participants over 12 months of follow-up.



## 9.2.2 Secondary SRH objectives

The secondary objectives of the SRH intervention are:

- i) To assess the effectiveness of the SRH intervention at reducing HIV/STI incidence over 12 months of follow-up among FSW in Kenya (HIV and syphilis measured at baseline, 6 months and 12 months)
- ii) To assess the effectiveness of the SRH intervention at improving contraceptive knowledge (median knowledge score) after 6 and 12 months
- iii) To assess the feasibility and acceptability of the SRH mHealth intervention.

## 9.3 Objectives 2: Nutrition intervention

### 9.3.1 Primary nutrition objective

The primary objective of the nutrition intervention is:

To assess the effectiveness of a 12-month mobile phone-based nutritional health promotion intervention on nutritional status among FSWs in Kenya

#### **Primary nutrition endpoints (relating to primary nutrition objective)**

1. Prevalence of anaemia (haemoglobin  $<12.0$  g/dL, or  $<11$ g/dL if pregnant) among study participants at month 12.  
Anaemia will be assessed using a certified laboratory-based haematology machine.  
Assessment will be done at the 12-month visit.

#### **Secondary nutrition endpoints (relating to primary nutrition objective)**

2. Mean haemoglobin levels (units g/dL) among participants at month 12;
3. Proportion of female sex workers with malnutrition, either underweight (BMI  $<18.5$ kg/m<sup>2</sup>) or overweight (BMI  $\geq 25$  kg/m<sup>2</sup>)
4. Proportion reporting nutritious diet and good eating behaviour at month 6 and month 12.
5. Median score in nutrition knowledge among study participants at month 6 and month 12.

### 9.3.2 Secondary nutrition objectives

- i) To assess the feasibility and acceptability of the nutrition mHealth intervention;
- ii) To assess performance, feasibility and acceptability of a mobile phone administered application for measuring anaemia (sub-study).

## 10 Study design and methods

### 10.1 Study setting

The study will be conducted in two areas of Mombasa, a major economic centre in Kenya and East Africa, with busy port, rail and industrial enterprises. The International Centre for Reproductive Health (ICRH; a WHO Collaborating Centre for Reproductive Health in Mombasa) has a strong research track record including prospective intervention studies with FSWs (Thomsen, Ombidi et al. 2006; Luchters, Chersich et al. 2007; Pack, L'Engle et al. 2013; Bengtson, L'Engle et al. 2014 Accepted) and numerous non-intervention designs spanning almost 15 years (Chersich, Luchters et al. 2007; Luchters, Chersich et al. 2008; Luchters, Richter et al. 2013). ICRH in collaboration with the National AIDS and STI Control Programme (NAS COP) in Kenya did a two-stage geographic mapping and enumeration exercise of FSWs in 2010, and estimated that 9,288 (range 6,917-11,660) FSW operate from 744 venues across four Mombasa areas (National AIDS & STI Control Programme (NAS COP) and National AIDS Council (NAC) 2012). We will recruit FSW from two of these areas: Changamwe (where 1,223 FSWs work from 248 venues) and Kisauni (where 3,617 FSWs work from 263 venues) (National AIDS & STI Control Programme (NAS COP) and National AIDS Council (NAC) 2012). Sex work venues here include nightclubs, bars, hotels, private brothels, small businesses, street sites/corners.

### 10.2 Study design

This is a two-arm cluster randomised controlled trial to assess the effectiveness of two mHealth interventions (SRH and nutrition). Eligible women will be recruited from sex work venues (the clusters identified in the mapping exercise) by well-established peer outreach workers and randomised to receive either a 12-month sexual and reproductive health intervention or a 12-month nutritional health intervention via mobile phone (see intervention descriptions below). Effectiveness assessment will be done for each of the interventions with the other as the control group. As each intervention addresses a unique set of specific issues, and the delivery of the intervention is the same, they will each form an appropriate control group.

In addition, qualitative inquiries consisting of in-depth interviews will be conducted in the SRH study arm to further assess secondary objectives with regards to feasibility and acceptability of the intervention. Qualitative methods will explore both positive and negative attributes of the SRH intervention, and explore in depth how the intervention influenced the attitudes, behaviours and practices of female sex workers relating to sexual risk behaviour, family planning and FP service access. Moreover, we will explore how this influenced the relationship with their emotional (non-paying) partner(s). Women in the nutrition arm will not be included in the qualitative interviews. More detail about the qualitative inquiry is provided in Section 15.

### 10.3 Study population

FSW will be recruited from approximately 86 sex work venues (our clusters). We will sample each venue with a probability proportional to FSW population size at the venue, using a sampling frame based on the 2012 and/or 2014 mapping of venues and population enumeration (capture-recapture) previously conducted by our team (National AIDS & STI Control Programme (NAS COP) and National AIDS Council (NAC) 2012). Peer outreach workers familiar with the respective areas are responsible for inviting women to participate in the study. Women will be consecutively recruited from selected sex work venues. The study will be promoted at these venues and through word of mouth.

#### 10.3.1 Inclusion criteria

To be eligible for participation in the study, the participants will have to meet the following criteria:

- i) female gender
- ii) be aged between 16 and 34 years of age (16 is the legal age of consent for research participation);
- iii) self-report to have engaged in paid sex work at the recruitment hotspot in the last six months;
- iv) have a personal mobile phone with Safaricom or Airtel subscription, and be willing to provide the number to the researchers, on which they can receive the mHealth intervention messages;
- v) self-report to be 'SMS literate'
- vi) not currently be pregnant or planning pregnancy within 12 months;
- vii) reside, and plan to continue to reside, within the site-specific catchment area for the next 12 months, and be willing to return for follow-up at 6 months and 12 months; and
- viii) be willing to provide reliable contact information (e.g. home address) to be contacted by a member of the research team in the community to remind them to re-attend follow-up visits; or be traced should these visits not be attended;
- ix) be able and willing to give written informed consent for enrolment in the study.

#### 10.3.2 Exclusion criteria

- i) planning to travel or relocate from the study areas;
- ii) participating in another mHealth intervention study; and
- iii) having a medical or non-medical issue incapacitating participation in the research, as decided by the local Principal Investigator.

1  
2  
3  
4  
5  
6  
7  
8  
9  
10  
11  
12  
13  
14  
15  
16  
17  
18  
19  
20  
21  
22  
23  
24  
25  
26  
27  
28  
29  
30  
31  
32  
33  
34  
35  
36  
37  
38  
39  
40  
41  
42  
43  
44  
45  
46  
47  
48  
49  
50  
51  
52  
53  
54  
55  
56  
57  
58  
59  
60

For peer review only

## 11 Description of the intervention

Both the SRH intervention and the nutrition intervention consist of SMS (text) messages sent to participants two to three times per week for 12 months. This includes the following components:

- Stand-alone ‘push’ texts covering the main content domains, providing simple information and strategies to prompt action;
- ‘Role model stories’ about FSWs modelling healthy social norms and sent in 4-5 instalments in one month (alternating months with stand-alone messages);
- ‘Pull’ on-demand menu that can be accessed by participants texting into the system to obtain more information on certain topics and local services.

The intervention will be delivered by VOTO mobile (<https://www.votomobile.org/>). This is an online mobile platform, which allows automated SMS and calls to be sent to many subscribers simultaneously, and pull content to be accessed via purchased shortcodes for specific mobile network providers (Safaricom and Airtel in this case). All messages will be loaded onto the system in pre-determined order and sent automatically to participants at the scheduled time (calculated from each cluster’s start date). Participants will be able to text assigned codes at any time during the study to access the pull content, with SMS costs incurred by the study (no charge for participants). Participants will be grouped on the system by cluster, with nutrition and SRH content assigned to the corresponding group, so that those in the nutrition arm will not directly access SRH content and vice versa.

Based on findings from our formative research, the following table provides additional detail about the estimated number, length and timing of messages:

| Message type                                                    | Estimated number of messages | Length                                              | Timing <sup>1</sup>                                                           |
|-----------------------------------------------------------------|------------------------------|-----------------------------------------------------|-------------------------------------------------------------------------------|
| Stand-alone push messages                                       | 77                           | Up to 160 characters (1 SMS ‘screen’ <sup>2</sup> ) | 3 per week (sent Monday, Wednesday and Saturday mornings)                     |
| Push interview reminders and WHISPER information                | 6                            | 160 – 480 characters (2-3 screens)                  | during months 1, 3, 5, 7, 9, 11, 13 <sup>3</sup>                              |
| Role model stories                                              | 26 (covering 6 stories)      | 160 – 640 characters (2-4 screens) per message      | 2 per week (sent Monday and Friday mornings) during months 2, 4, 6, 8, 10, 12 |
| ‘Alerts’: push messages linking participants to the pull system | 16                           | Up to 160 characters (1 screen)                     |                                                                               |

<sup>1</sup> There are some minor variations to these schedules, e.g. an interview reminder and push message during month 6 for logistical reasons.

<sup>2</sup> Messages are charged per 160 characters (1 screen). Messages longer than this will appear as one long SMS on most phones but may be split into multiple messages on older phones.

<sup>3</sup> Each ‘month’ is 4 weeks, making up 12 calendar months in total

|                           |    |                                    |                 |
|---------------------------|----|------------------------------------|-----------------|
| Pull (on-demand) messages | 63 | 160 – 640 characters (2-4 screens) | User determined |
|---------------------------|----|------------------------------------|-----------------|

### 11.1 The sexual and reproductive health intervention

The theoretical logic model underpinning the messages is presented below. The primary focus of the message content is dual method contraceptive use and long-acting reversible contraceptives (LARCs). Other domains which are known to impact on FSW’s sexual risk behaviour and could plausibly impact on their pregnancy risk include HIV and STI knowledge and prevention, alcohol use, health service utilisation and gender-based violence and rights. These domains were drawn from a literature review done by the study team identifying key SRH issues for sex workers and barriers and motivators to changing risk behaviour.

It is predicted that these messages will improve FSWs’ knowledge and their self-efficacy for contraceptive use, improve relationship control, for example their ability to negotiate contraceptive use with partners, and increase health-seeking. In turn, these all contribute to increasing contraceptive use. These behavioural and interpersonal factors are known to impact on pregnancy, STIs and HIV acquisition, which are the biological outcomes the intervention aims to address.

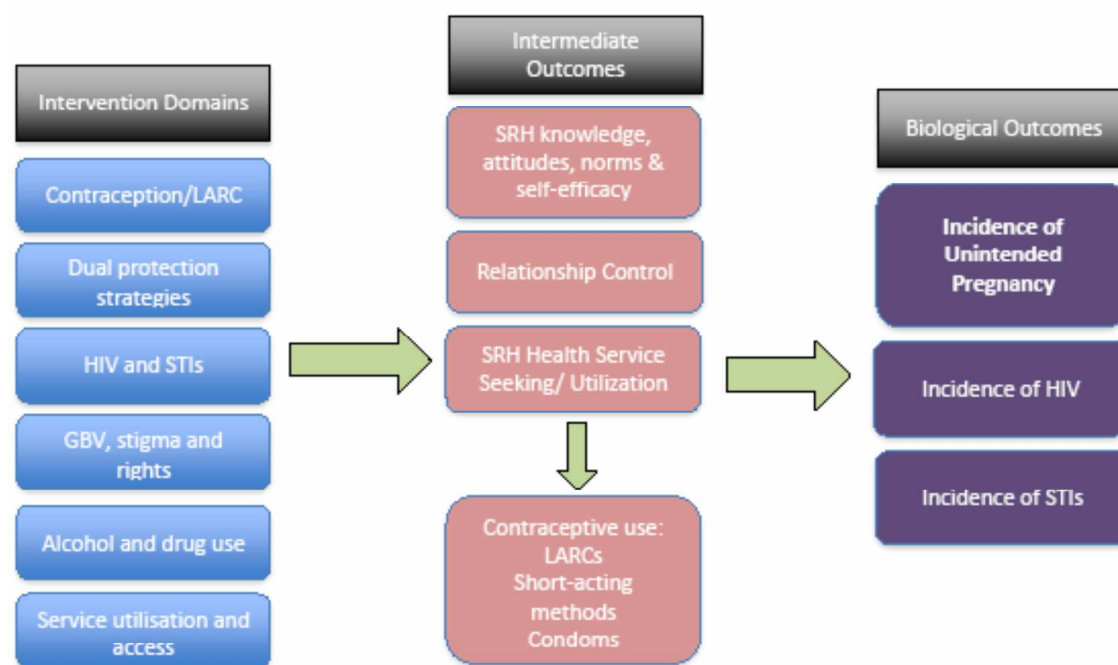

## 11.2 The nutrition intervention

Similarly to the SRH intervention, the nutrition intervention domains are based on a theoretical logic model which is presented below. The primary focus of the message content is consumption of high value nutrient diets, aimed at improved nutritional status, particularly the level iron. Key nutrition domains in the program include conceptualisation of nutrition, food purchasing choices, food preparation tips, food safety tips and food system tips. Other domains considered preconditions for improved nutritional status include water sanitation and hygiene (WASH) and health promotion. The domains are based on formative research with female sex workers in Mombasa and literature review.

It is predicted that these messages will improve knowledge, attitudes, practices and their self-efficacy for improved diets, good eating behaviours, improved hygiene, interpersonal communication and support, and utilisation of available services.

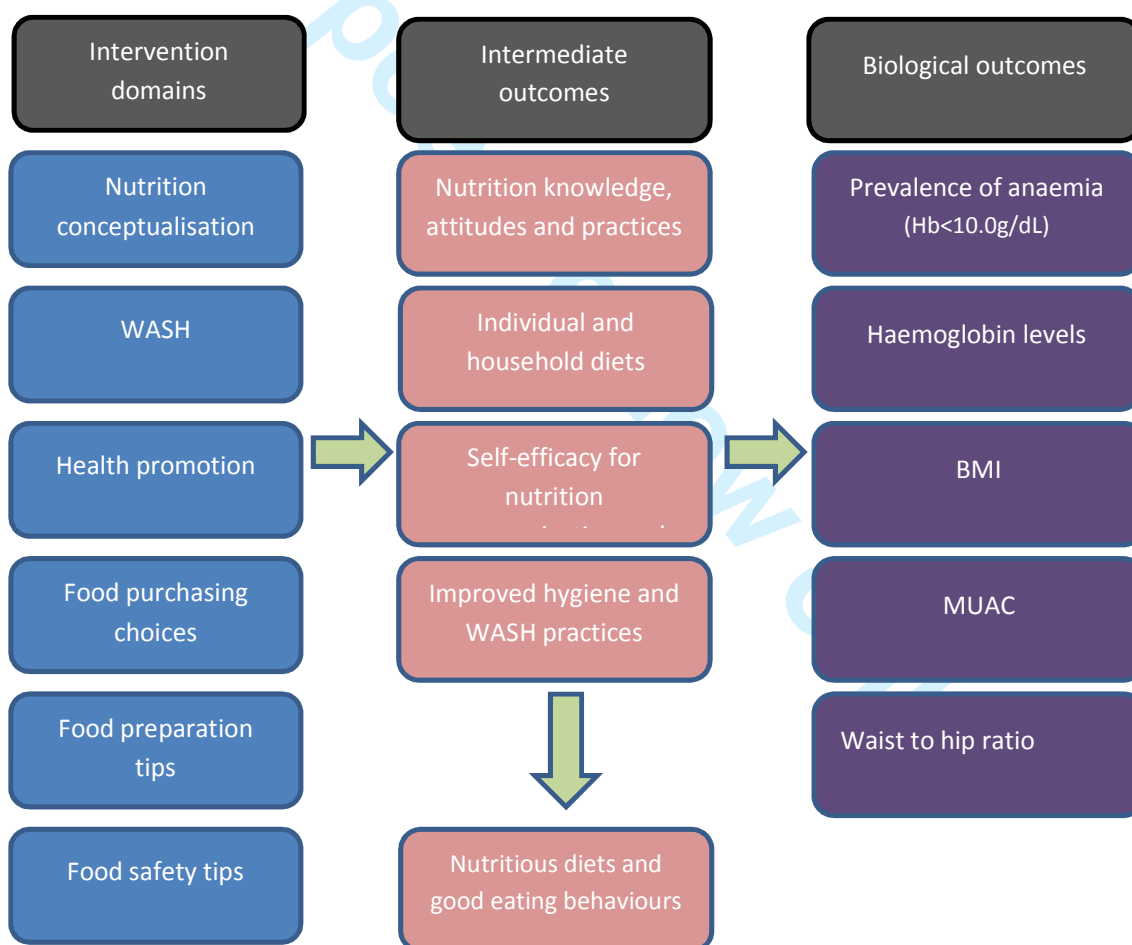

## 12 Study procedures

### 12.1 Randomisation

Randomisation will occur at cluster level, with clusters being defined as establishments where FSWs sell sex and have been identified in past research with 248 venues in Changamwe and 263 in Kisauni (National AIDS & STI Control Programme (NAS COP) and National AIDS Council (NAC) 2012).

A two-stage sampling process will be used. At the first sampling stage, FSW venues will be selected proportionate to size and randomised to either control or intervention arms. At the second sampling stage, we will aim to consecutively select 10 FSWs from each randomised venue, based on an estimated average FSW venue cluster size of 12 (National AIDS & STI Control Programme (NAS COP) and National AIDS Council (NAC) 2012). At venues where less than 10 FSWs are active, all FSWs from the selected venue will be invited to participate in the study. Sampling of FSW venues will continue and additional venues sampled until the required sample size of 860 women is achieved.

Cluster randomisation will be done centrally and will be 1:1 (intervention and control). Participant responses will be weighted post data collection to account for any variation in relative selection probability due to variability in size of selected clusters. Participants and study team will be blinded to intervention and control allocation until after cluster enrolment is completed and all baseline questionnaires administered for that cluster. Overall, the steps above allow optimal (as random as possible) sampling from the FSW population, but minimises the potential dilution effect of individual randomisation through message sharing.

### 12.2 Pre-screening

Potential study participants who have been identified at the cluster level will be approached and minimum pre-screening applied. Women who are aged 16 years or older, self-report to have engaged in paid sex work in the last six months, residing and planning to continue to reside within the site-specific catchment area for the next 12 months and who have a personal mobile phone from either Safaricom or Airtel will be invited to participate in the study. Potentially eligible women will receive a card with a unique, anonymous **referral card number** (made up of cluster number and sequential participant number for that cluster) and are offered to go to the nearest research clinic (in Kisauni or Changamwe) for full screening of eligibility criteria, consenting and subsequent enrolment as soon as possible and within the next 7 days. It is anticipated that each cluster will be fully enrolled within a 14-day period. The study will document the number of cards that are disbursed at each cluster following pre-screening. No other data will be collected at this stage.



### 12.3 Screening and enrolment procedures

Study visits will be conducted by trained research personnel at enrolment and after 6 and 12 months in a dedicated research space at 2 local dedicated research clinics linked to health facilities. Volunteers must bring their referral card number with them to undergo the screening process, to ensure that only volunteers selected by the random sampling process can enrol.

At this first presentation at the research clinic, the study will be explained in detail to the volunteers by the investigator or his/her representative. **Intervention allocation will remain blinded to the study participants and study staff until the cluster is fully enrolled.** If the volunteer is willing to participate in the study, she will be given the written informed consent form to read. If she is illiterate, the form will be read to her by the investigator in the presence of a witness, who is not involved with the study. Any questions about the study that the volunteer may have will be answered by the investigator. Once the participant is satisfied with the information given about the study, she will be requested to sign the written informed consent form. Illiterate women will be asked to mark their left thumb-print on the form in the presence of the witness. The witness will sign and date the form to confirm that they have read or witnessed the accurate reading of the form to the potential participant.

After the subject signs the informed consent document, the full eligibility criteria will be assessed. A master log of volunteers with referral card number, eligibility criteria, and demographic information will be maintained and kept in a locked/secure location. If the volunteer is not admitted into the study, study staff will document the reason for failing screening. For potential volunteers who do not meet the study eligibility criteria, the screening process will be discontinued when ineligibility is determined. Subjects who successfully complete screening will have their referral card number recorded as their **Study Identification Number (study ID)**.

Additional procedures for enrolment visit include administering the structured baseline questionnaire, clinical examination, urine pregnancy test, STI syndromic management, HIV and Syphilis rapid tests, haemoglobin assessment using haemoglobinometer, Eynaemia mobile application (see 11.6.3), and blood withdrawal for full haemogram (including Hb, haematocrit, white blood count, and mean cell volume; see also Chapter 11.6 on data collection procedures for more detail).

The results of rapid diagnostic tests done at the baseline (urine pregnancy, haemoglobin measured with a haemoglobinometer, HIV and syphilis), month 6 (urine pregnancy, HIV and syphilis) and month 12 (urine pregnancy, haemoglobin measured with a haemoglobinometer, HIV and syphilis) will be communicated to the participants at the time of the visit. Participants newly diagnosed with HIV will be referred for treatment to specialised centres. Those with positive syphilis rapid test will be treated with benzathine penicillin, consistent with the national STI algorithm (NASCOP 2015). Those with anaemia

(Hb < 12.0 g/dL) will receive 1 month of ferrous sulphate 200mg three times per day and folic acid 5mg/day in accordance with Kenyan national guidelines, as well as a stat dose of albendazole 400mg as presumptive treatment for hookworm. They will also be referred to an appropriate health facility for follow up Hb testing and further investigation as necessary. Those with severe anaemia (Hb < 8.0 g/dL) or significant symptoms of anaemia, will receive an urgent referral for follow up investigations and treatment. Clinical officers will contact women and provide them with a referral if their full blood count reveals macrocytic anaemia (high MCV) or other serious pathology.

Women unable to tolerate the prescribed supplements will be advised to visit their nearest health centre for potential switch to injectable iron supplementation.

For consenting participants, a locator form with Study ID will be completed to potentially track participants for follow-up visits.

Each eligible participant will be registered as a subscriber in the VOTO online platform, and their mobile phone number, study ID and cluster number will be entered. No other identifying details will be entered into the system.

Once the cluster is fully enrolled (i.e. 10 participants or all participants have enrolled, or the 14 day enrolment period for the cluster has elapsed), the cluster will be randomised to either the SRH or nutrition arm. Each cluster will form a small group in the system, and will be added to the larger SRH or nutrition group after allocation. The intervention, either SRH or nutrition, will commence simultaneously among all participants of one cluster once the cluster is fully enrolled. The intervention will be scheduled to commence in the week following completed enrolment (this corresponds to day 1, when the first WHISPER message will be sent). All members of the cluster will therefore be sent the same messages on the same days throughout the intervention period. The study data manager will have oversight of the use of the VOTO platform, with a limited number of team members given administration access to enter new participants into the system once they are enrolled.

#### 12.4 Follow-up visits (month 6 and 12)

Follow-up visits will be scheduled on month 6 and month 12 after enrolment and completed within a six-week window around the scheduled date, beginning two weeks prior to the target date and extending four weeks after the target date.

Participants will be reminded via SMS three weeks and then one week prior to their face-to-face data collection visit. Women not attending their scheduled visit will be reminded via SMS after one week, followed by a phone call and/or home visit when participants do not attend. For volunteers who do not complete scheduled visits within the allowable window, the visit will be considered "missed" and relevant documentation will be completed to document the missed visit.

During follow-up visits at month 6 and month 12, study procedures will be similar to those at baseline and include administering the structured questionnaire, clinical examination, urine pregnancy test, STI syndromic management, HIV and Syphilis rapid testing, haemoglobin assessment using haemoglobinometer (month 12 only), Eynaemia mobile application (month 12 only), and blood withdrawal for full haemogram (month 12 only; see Chapter 11.6 on data collection procedures for more detail).

### 12.5 Unscheduled visits

Additional visit(s) outside of scheduled study visits may be arranged at the discretion of the investigators. Interim visits may occur when the participant has questions for study staff, for interim assessment of pregnancy, Hb, HIV/STI and/or treatment in response to symptoms, or for other reasons at participant's request.

All interim contacts and visits will be documented on the study documents.

### 12.6 Data collection procedures

The below table outlines the data being collected as part of the randomised trial during scheduled visits.

**Table 1: Study assessments among intervention and control participants during follow-up**

| Assessments                                                                   | Female Sex Workers' study visits |         |          |
|-------------------------------------------------------------------------------|----------------------------------|---------|----------|
|                                                                               | Month 0                          | Month 6 | Month 12 |
| <i>General procedures</i>                                                     |                                  |         |          |
| Informed consent procedure (written consent obtained at baseline only)        | ∅                                | ∅       | ∅        |
| Eligibility assessment                                                        | ∅                                |         |          |
| Study ID allocation                                                           | ∅                                |         |          |
| Mobile phone registration                                                     | ∅                                |         |          |
| Structured self-report questionnaire                                          | ∅                                | ∅       | ∅        |
| Qualitative inquiry (subgroup of participants from SRH intervention arm only) |                                  |         | ∅        |
| <i>Clinical examination</i>                                                   |                                  |         |          |
| Nutritional anthropometric assessment                                         | ∅                                | ∅       | ∅        |
| Syndromic STI management                                                      | ∅                                | ∅       | ∅        |
| <i>Biological assessment</i>                                                  |                                  |         |          |
| Urine pregnancy testing                                                       | ∅                                | ∅       | ∅        |

|                                                                          |   |   |   |
|--------------------------------------------------------------------------|---|---|---|
| Haemoglobin using haemoglobinometer                                      | ∕ |   | ∕ |
| Full Haemogram including haemoglobin, haematocrit and Mean Cell Volume   | ∕ |   | ∕ |
| Haemoglobin using Eynaemia mobile application                            | ∕ |   | ∕ |
| HIV testing, syphilis testing (including pre- and post-test counselling) | ∕ | ∕ | ∕ |

### 12.6.1 Structured face-to-face interviews

Questionnaires have been developed in English, and are based on previously validated measurement tools where feasible, and translated into Swahili.

The baseline questionnaire (annex 5) will ask for detailed socio-demographic information including age, general sexual and reproductive history, sex work, employment, income, family and living circumstances, education, literacy, health and illness, and information about current and past partners.

In addition, questions will ask about pregnancy; pregnancy intentions; contraception and condom use (including dual protection); reasons for discontinuation/non-use of contraception; contraceptive self-efficacy; sexual and reproductive health seeking and service utilisation; sexual risk behaviours; HIV/STI symptoms; sexual and reproductive health knowledge and attitudes; relationship control and joint-decision-making with non-paying emotional partners; dietary intake; perception of body image; nutrition-related health seeking and service utilisation; and food- and hygiene-related knowledge and behaviours.

### 12.6.2 Clinical examinations

#### 12.6.2.1 Nutritional anthropometric assessments

At baseline, 6 months and 12 months, trained study nurses will conduct anthropometric measurements to assess the nutritional status including weight, height, waist circumference, hip circumference, and mid upper-arm circumference (MUAC).

#### **Weight measurement**

All participants will be weighed twice using a validated instrument, such as a bench scale. The scale must be placed on an even, uncarpeted area and levelled with the aid of its inbuilt spirit level (if a zero [0] appears in the display window, the scale is level). Participants are to be weighed without shoes and dressed in light clothing. The participant will be requested to step on the scale and upright in the middle of the platform, facing the research assistant, looking straight ahead with the feet flat and slightly apart until the reading was taken. The research assistant then records the reading in the space provided in the clinical examination form. The weight is recorded to the nearest 100g. The participant is then requested to step off the scale. After the participant steps down from the scale, the research assistant must

wait for the zero reading to appear on the digital display before repeating the procedure. The two readings must not vary by more than 100g. If they do, the scale has to be checked for accuracy, and the procedure repeated until the two readings agree within 100g. If agreement cannot be reached, and the two measurements differ by more than 100g, a third measure must be taken. The two measurements that were nearest to each other will be selected for further analysis.

### **Height measurement**

Standing height will be measured using a stadiometer, see example figure below. The stadiometer is placed on an even, uncarpeted area and the participant's shoes removed. If the hair is tied up on the top of the head, it must be released and the participant positioned facing the research assistant and looking straight ahead with head in the Frankfurt plane. The participant's shoulders should be relaxed, with shoulder blades, buttocks and heels slightly touching the stadiometer's stand, arms relaxed at sides, legs straight and knees together, and feet flat, heels touching together. The measurement then recorded in the space provided in the clinical examination form and the procedure repeated once. Two readings are taken and the measurements were repeated. A third measurement must be taken if the two readings varied by more than 1 cm. The two measurements closest to each other were used for further analysis.

Figure 1: Measuring height of participants

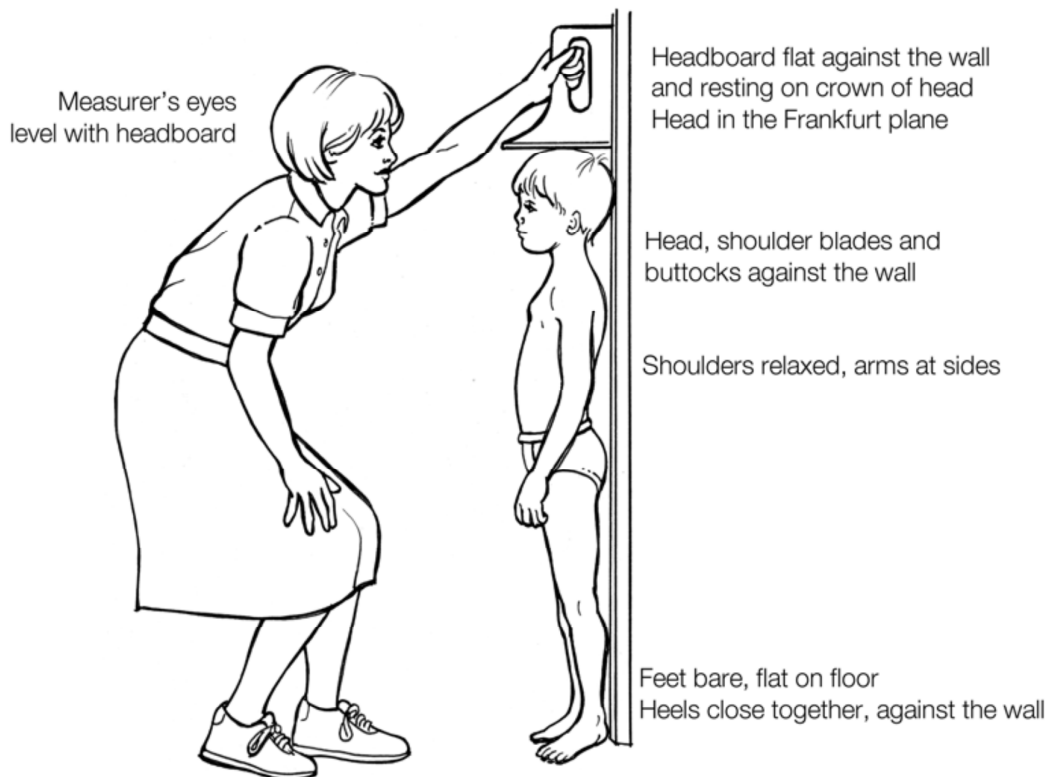

Figure 2: The Frankfurt plane is defined by a line from the most superior point of auditory canal to the most inferior point of infraorbital rim (eye socket/hard bony rim underneath the eye).

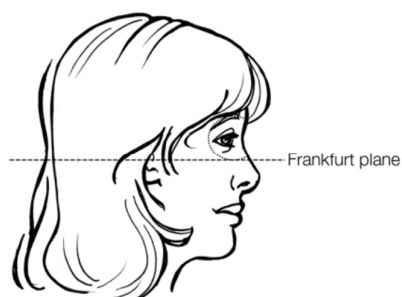

### **Body mass index**

The body mass index (BMI) will be calculated for all participants and the recommended CDC/WHO cut-offs used to ascertain underweight (BMI < 18.5 kg/m<sup>2</sup>), normal weight (BMI 18.5 > 25.0 kg/m<sup>2</sup>), overweight (BMI ≥ 25 kg/m<sup>2</sup>) and obesity (BMI ≥ 30 kg/m<sup>2</sup>). This result will not be communicated to participants.

### **Waist circumference measurement**

The participant should stand erect, with the abdomen relaxed, arms at the sides, feet together, and her weight equally divided over both legs. The lowest rib-margin and the iliac crest will be identified in the mid-axillary line. The level of the waist circumference is defined as the midpoint between the two anatomical landmarks and measured by positioning a non-stretch fibreglass tape (Seca Model 203; Medical Scales and Measuring Systems) horizontally round the abdomen. Participants will be asked to breathe normally and to breathe out gently while the measurement was being taken so as to prevent them from contracting their muscles or holding their breath. The measurement is taken without the tape compressing the skin. The reading is taken to the nearest 1cm. Two measurements will be taken and recorded in the appropriate section of the clinical examination form. If the two measurements differ by more than 1cm, a third measurement was taken. The two measurements that were nearest to each other will be used for further analysis (Lohman, Roche et al. (eds) 1988; Jones, Hunt et al. 1986).

A waist circumference > 88.0 cm in women indicates central obesity. This result will not be communicated to participants.

### **Hip circumference measurement**

Participants must stand erect and positioned as for the measurement of the waist circumference with arms at the sides and feet slightly apart. The measurement is taken at

1  
2  
3 the point yielding the maximum circumference over the buttocks (Jones, Hunt et al. 1986)  
4 with the tape held in a horizontal plane, touching the skin but not indenting the soft tissue  
5 (Lohman, Roche et al. (eds) 1988). The measurement is taken to the nearest 1cm. Two  
6 measurements are taken and recorded in the appropriate section of the clinical examination  
7 form. If the two measurements differ by more than 1cm, a third measurement is taken. The  
8 two measurements that were nearest to each other are selected for further analysis.  
9  
10

### 11 ***Waist-to-hip ratio***

12 The waist-to-hip ratio will be calculated by dividing the waist circumference by the hip  
13 circumference. Values of > 0.8 are regarded as indicative of central obesity. This result will  
14 not be communicated to participants.  
15  
16  
17

### 18 ***Mid-upper arm circumference (MUAC)***

19 MUAC is the circumference of the left upper arm, measured at the mid-point between the  
20 tip of the shoulder and the tip of the elbow (olecranon process and the acromium).  
21 As MUAC is less affected than BMI by the localised accumulation of excess fluid (pedal  
22 oedema, periorbital oedema, ascites) common in famine, it is likely to prove to be a more  
23 sensitive index of tissue atrophy than low body weight. It is also relatively independent of  
24 height. Values of <185mm and <160mm will be used to denote moderate and severe  
25 undernutrition respectively.  
26  
27  
28  
29

### 30 ***12.6.2.2 Syndromic STI management***

31 During their clinical assessment, participants will ask about their experience of recent STI-related  
32 symptoms, under the main syndromic categories as per World Health Organisation guidelines  
33 (genital ulceration, abnormal vaginal discharge, vaginal itching/burning, groin lump, lower  
34 abdominal pain). If they report symptoms, they will be given STI counselling and have a vaginal  
35 examination (and abdominal examination if indicated) as per the WHO guidelines. Participants with  
36 evidence of an STI syndrome will be provided with the recommended treatment and referral for  
37 further investigation if indicated.  
38  
39  
40

### 41 ***12.6.3 Biological investigations***

42 Trained study nurses will obtain urine samples for pregnancy testing, and blood samples for  
43 full haemogram (including WBC, WBC differential, Hb, Ht, MCV, MCH, MCHC, Platelets,  
44 RBC), rapid haemoglobin test (using haemoglobinometer), syphilis and HIV. Moreover,  
45 assessment with the novel Eynaemia application on mobile phone will be administered.  
46  
47  
48

### 49 ***Urine pregnancy testing***

50 Urine pregnancy testing will be done at baseline (as part of eligibility screening) and during  
51 follow-up at month 6 and month 12. The test will be done to detect the presence of the  
52 human chorionic gonadotropin (hCG). The hormone is produced by the placenta shortly  
53 after the embryo attaches to the uterine lining. It builds up rapidly in the body within the  
54 first few days of pregnancy or implantation, most but not always about 6 to 12 days after  
55 fertilisation.  
56  
57  
58  
59  
60

### **HIV testing**

Pre- and post-test counselling will be conducted as per standard care by certified counsellors. HIV testing will be done by Determine® HIV-1 and First response® HIV-1 Rapid Tests conducted. Only those wishing to know their HIV status will receive post-test counselling (participants may decide not to know the results of HIV testing). Sex workers who test HIV positive at a visit will be considered HIV-infected and not have additional HIV tests at subsequent follow-up visits.

### **Syphilis**

Syphilis serologic screening will be done using a rapid Treponema pallidum haemagglutination (TPHA) test. Those found positive will be treated with a stat IM injection of Benzathine Penicillin. Pregnant women found to be positive on TPHA will be provided treatment and referred for specialist follow-up. **Anaemia assessments**

Various assessments will be done to determine haemoglobin. Firstly, a point-of-care haemoglobin test will be performed at baseline and at the 12-month follow-up visit using a haemoglobinometer. The test result will be communicated as soon as the result is available. Participants with anaemia will receive iron and folic acid supplementation, and presumptive hookworm treatment, and referred for follow-up as described in section 12.3.

Secondly, a 5mL blood sample will be drawn and sent for assessment of a laboratory-based full haemogram, including Hb, haematocrit, white blood count, and mean cell volume. Blood samples will be kept in a cooler box containing ice packs, and couriered daily, in a cooler box containing ice packs, to reach the appointed laboratories within 24 hours from the time a blood sample was collected for biomarker analysis.

This assessment is used as the gold standard Hb test and used for the primary outcome assessment of the nutrition intervention. Moreover, this (gold standard) test result will be used for calibration and validation of the Eynaemia mobile application (see below). The results of the haemogram will not be communicated to participants, unless it reveals unexpected and significant pathology such as macrocytosis or very high white cell count, in which case participants will be contacted and referred accordingly. Results from the validated and approved haemoglobinometer will be communicated to participants at the point of testing.

### **Eynaemia mobile application (sub-study)**

This assessment will address the secondary objective to assess performance, feasibility and acceptability of a mobile phone administered application for measuring anaemia. Each of the study teams will have two study phones (four in total) with the Eynaemia application installed to assess anaemia. Participants will be requested to fill out a separate consent form (annex 3) for this assessment and results will not be communicated to the participants. Instead, results from the validated and approved haemoglobinometer will be communicated to participants.



At enrolment, and at month 12, each participant will have Eynaemia assessments from the left conjunctiva (2 pictures) and right conjunctiva (2 pictures) as well as both the hand palms.

The Eynaemia application estimates anaemia levels via photos taken of the participants' conjunctiva with a colour standard in view (see photo 1). Photos as part of the study will be collected using the front or rear view camera of one of the *study phones* operated by the study nurses. Each of the study phones will run Windows 10 mobile with full disk encryption and passcode authentication, and will be secured with Avast Anti-theft to allow remote deletion of all data.

**Photo 1: Palm photo with colour standard used for Eynaemia mobile application.**

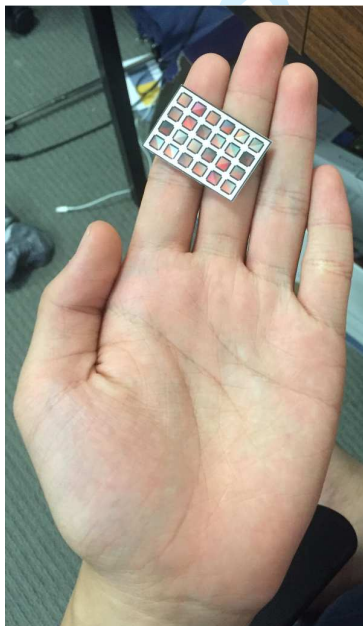

Once photos are captured they will be immediately uploaded to the *Eynaemia server*. Photos are encrypted on the server so that unauthorised personnel cannot view them. Once photos have been processed for quality assurance, photos will be cropped such that identifying features will be removed (see photo 2).

**Photo 2: Photo of cropped conjunctiva with colour card as stored with no identifying features.**

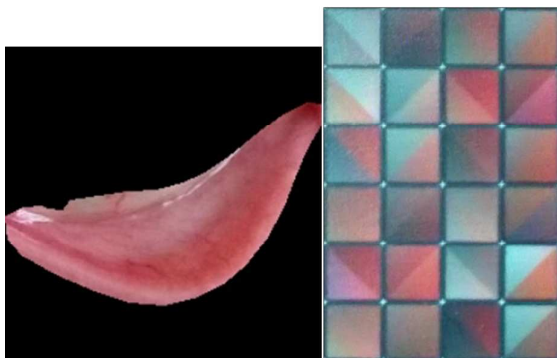

Photos may be retained for a short period of time on the *study phone* pending upload, in encrypted memory storage. Once uploaded, the photos will be erased from local storage on the *study phone*. All photos will be transmitted across the web using *HTTPS* with *TLS 1.2* encryption. Each photo will be identified using the patient's anonymous and unique study identifier.

Metadata associated with the photo will be collected, including *Username of data collector*, *IP address*, *Device UID*, as well as time taken will be stored upon the *Eyenaemia server*. Complete photos will only be retained on the server until they have passed quality control procedures. Quality control is done as follows:

| Number of photos  | Review time  |
|-------------------|--------------|
| 0 - 300           | Daily        |
| 300 - 600         | Twice weekly |
| 600 - 1200        | Weekly       |
| 1200 - completion | Fortnightly  |

Otherwise, long term data will only consist of extracted conjunctiva (photo 2), palm and colour standard, as well as aggregated statistics.

#### 12.6.4 Participant follow-up

Participants will be reminded via SMS three weeks and one week prior to their face-to-face data collection visit. Women not attending their scheduled visit will be reminded via SMS after one week, followed by a home visit when participants do not attend.

#### 12.6.5 Referral to services and treatment of anaemia

Participants with anaemia with anaemia (Hb < 12.0 g/dL) based on the haemoglobinometer result will receive 1 month of ferrous sulphate 200mg three times per day and folic acid 5mg/day in accordance with Kenyan national guidelines, as well as a stat dose of albendazole 400mg as presumptive treatment for hookworm. They will also be referred to an appropriate health facility for follow up Hb testing and further investigation as necessary. Those with severe anaemia (Hb < 8.0 g/dL) or significant symptoms of anaemia, will receive an urgent referral for follow up investigations and treatment at the district hospital. Women unable to tolerate the prescribed supplements will be advised to visit their nearest health centre. Study clinicians will contact women and provide them with a referral if their full blood count reveals macrocytic anaemia (high MCV) or other serious pathology.

Participants with any other relevant medical conditions requiring attention will be identified during study visits, and referred to their nearest health centre for further examination and care.

#### 12.7 Participant withdrawal

Participants may voluntarily withdraw from the study for any reason at any time during the study. At any time, a participant can inform the investigator that she is no longer willing to

1  
2  
3 receive the messages, and withdrawal will be implemented as soon as feasible in the VOTO  
4 system (no more than 14 days after the initial request).  
5

6 The Investigator may also withdraw volunteers from the study in order to protect their  
7 safety and/or if they are unwilling or unable to comply with required study procedures.  
8  
9 Volunteers may be withdrawn from the study if relevant government or regulatory  
10 authorities, or site Institutional Review Boards (IRBs) or Independent Ethics Committees  
11 (IECs) terminate the study prior to its planned end date. Every effort will be made to  
12 complete a final evaluation of volunteers who withdraw or are withdrawn from the study  
13 prior to completing follow-up. Study staff will record the reason(s) for all withdrawals in  
14 volunteers' study records.  
15  
16  
17  
18  
19  
20  
21  
22  
23  
24  
25  
26  
27  
28  
29  
30  
31  
32  
33  
34  
35  
36  
37  
38  
39  
40  
41  
42  
43  
44  
45  
46  
47  
48  
49  
50  
51  
52  
53  
54  
55  
56  
57  
58  
59  
60

## 13 Data management and statistical analysis

In the trial, all participants will be given a unique identification number to link their data. Questionnaires will be developed in English, translated into local language (Kiswahili), and then piloted before use. Data will be captured and managed electronically using handheld tablets with REDCap (Research Electronic Data Capture) software. REDCap provides a secure and intuitive interface for users to enter data and allows real time validation rules (with automated data type and range checks) at the time of entry. Data collected in the course of the research are managed by the program, and can be analyzed by commonly used statistical packages, including SAS, Stata, SPSS, and R. REDCap has a flexible and fine-grained authorisation matrix, and will allow different members of the study team to have different levels of access (none, read-only or edit) to data entry forms, and access to database management and data export tools. Provisions will be put in place to restrict access to data export to allow export of de-identified data only. REDCap includes full audit trail, recording all operations on the data, including viewing and exporting. The audit log records operation, date and time, and the user performing the operation, permitting review of the audit trail as necessary. REDCap enforces data integrity protection by design; all “databases” created by users are logical data sets on top of relational database with built-in integrity protection controls.

SMS data, and in particular data related to accessing the on-demand component, will be automatically collated on an online server, and then imported into the database. The data will be checked for consistency using common software and procedures, and any errors, inconsistencies and unexpected values in the data will be noted and queried with the clinic investigators and resolved or confirmed as rapidly as practical. A electronic audit trail will be kept of all changes made to the study database.

Hard-copy study documentation will be kept securely as study source documents for potential review and/or audit during or until 7 years after the study ends. Participating women’s consent forms and enrolment log will be kept separately in locked cabinets in participating clinics, and at the local data management centre. Only the Principal Investigators, study co-ordinator and authorised study personnel will have access.

### 13.1 Sample size

The sample size was calculated to obtain sufficient power to examine the effects of the SRH intervention. The sample size formulae are shown in figure 3 below.

Based on a 12-month incidence of unintended pregnancy of 27% in the control group (data from our previous research in the study area) (Bosire, Okal et al. 2009), and in order to detect a 37% relative reduction in annual unintended pregnancy incidence (hazard risk=0.63), with 80% power (5% significance level), we will enrol 860 participants from a minimum of 86 FSW venues – 430 participants per arm. This estimate is adjusted for an

1  
2  
3 expected 10% attrition rate and estimated inflation in standard error due to cluster  
4 randomisation (deff=1.18: estimated ICC=0.02,(Cai, Shi et al. 2010) cluster size=10).  
5  
6  
7  
8

$$9 \quad E = \frac{(z_{1-\frac{\alpha}{k}} + z_{1-\beta})^2}{\pi_1(1-\pi_1)\ln^2(\Delta)} \quad (1)$$

$$12 \quad p_E = 1 - \{S_1(T) + S_2(T)\}0.5 \quad (2)$$

$$14 \quad N = \frac{E}{p_E} \quad (3)$$

$$16 \quad D_{eff} = 1 + (\bar{m} - 1)\rho \quad (4)$$

17  
18  
19  
20  
21  
22 Figure 3: Sample size formulae. Events for a given effect size (hazard ratio), exposure distribution  
23 and type I and II error rate (1); overall probability of failure (2) given hazard ratio; required number  
24 of observations given overall probability of failure (3) and design effect (inflation factor) given  
25 expected cluster size and between cluster heterogeneity (4).  
26  
27  
28  
29  
30  
31  
32

33  
34 Sample size estimates were not done for the nutrition trial arm. Estimates of anaemia  
35 among the local sex work population are not available to inform a sample size calculation  
36 with any precision. The sample size in this trial is, however, considerably larger than another  
37 trial in Kenya which aimed to reduce anaemia by providing iron supplements alone. That  
38 study, among 470 postpartum women was able to detect a difference in mean haemoglobin  
39 between the two study arms (Mwangi, Roth et al. 2015).  
40  
41

### 42 13.2 Statistical analysis and reporting

43  
44 A detailed scheme of analysis will be developed at a later date while the study is ongoing.  
45 We outline in this section some of the principles, which will be used to guide decisions  
46 during data analysis. Analysis methods will, as far as possible, follow the CONSORT  
47 guidelines (Moher, Schulz et al. 2001).  
48  
49

50 Primary analysis will compare the primary endpoints (either unintended pregnancy  
51 incidence, or anaemia prevalence) between groups at 12 months and secondary analysis will  
52 compare groups at 6 months.  
53

54 Given the interval-censored nature of unintended pregnancy incidence, discrete-time  
55 survival models using generalised linear modelling will be used to compare unintended  
56  
57  
58  
59  
60

1  
2  
3 pregnancy incidence between FSW exposed to SRH intervention and those exposed to  
4 nutrition intervention messages.  
5

6 These analyses will provide estimates with robust standard errors for FSW venue clustering.  
7 Standardised probability weighting will be applied in population-averaged analyses to  
8 account for any sampling bias where achieved sample cluster sizes vary. Where  
9 randomisation is not effective in removing allocation bias, adjusted models will be specified.  
10 In all analyses, associations will be considered statistically significant at the 5% level. The  
11 statistician will conduct the analysis blind to the intervention group.  
12  
13

14 Our secondary analyses will employ a per-protocol approach to evaluate differences in  
15 primary and secondary outcomes. These analyses will resemble the intent-to-treat analyses  
16 described above, with the difference that individuals will be evaluated based on the number  
17 of messages of intervention exposure they received (as reported by women or as measured  
18 by cell phone company reports). As above, these analyses will account for the clustering of  
19 results within sites and include use of causal inference methods to adjust for potential  
20 confounding. These analyses will allow us to determine whether an observed effect of the  
21 intervention is limited due to inadequate implementation and whether there is a needed  
22 'dosage' for the interventions to successfully impact outcomes. This will also permit any  
23 accounting for contamination should a control-group participant also have received access  
24 to intervention messages of the other group.  
25  
26  
27  
28  
29

30 Reporting of findings will adhere to the 2016 Guidelines for reporting of health  
31 interventions using mobile phones (see checklist below) (Agarwal, LeFevre et al. 2016).  
32  
33  
34  
35  
36  
37  
38  
39  
40  
41  
42  
43  
44  
45  
46  
47  
48  
49  
50  
51  
52  
53  
54  
55  
56  
57  
58  
59  
60

## WHISPER or SHOUT Study Protocol version 1.2

1  
2  
3  
4  
5  
6  
7  
8  
9  
10  
11  
12  
13  
14  
15  
16  
17  
18  
19  
20  
21  
22  
23  
24  
25  
26  
27  
28  
29  
30  
31  
32  
33  
34  
35  
36  
37  
38  
39  
40  
41  
42  
43  
44  
45  
46  
47  
48  
49  
50  
51  
52  
53  
54  
55  
56  
57  
58  
59  
60

| Criteria                                                   | Item no | Notes                                                                                                                                                                                                                                                                                                                                                                                                               | Page no where item is reported |
|------------------------------------------------------------|---------|---------------------------------------------------------------------------------------------------------------------------------------------------------------------------------------------------------------------------------------------------------------------------------------------------------------------------------------------------------------------------------------------------------------------|--------------------------------|
| Infrastructure (population level)                          | 1       | Clearly presents the availability of infrastructure to support technology operations in the study location. This refers to physical infrastructure such as electricity, access to power, connectivity etc. In the local context. Reporting X% network coverage rate in the country is insufficient if the study is not being conducted at the country level                                                         |                                |
| Technology platform                                        | 2       | Describes and provides justification for the technology architecture. This includes a description of software and hardware and details of any modifications made to publicly available software                                                                                                                                                                                                                     |                                |
| Interoperability/ Health Information systems (HIS) context | 3       | Describes how mHealth intervention can integrate into existing health information systems. Refers to whether the potential of technical and structural integration into existing HIS or programme has been described irrespective of whether such integration has been achieved by the existing system                                                                                                              |                                |
| Intervention delivery                                      | 4       | The delivery of the mHealth intervention is clearly described. This should include frequency of mobile communication, mode of delivery of intervention (that is, SMS, face to face, interactive voice response), timing and duration over which delivery occurred                                                                                                                                                   |                                |
| Intervention content                                       | 5       | Details of the content of the intervention are described. Source and any modifications of the intervention content is described                                                                                                                                                                                                                                                                                     |                                |
| Usability/content testing                                  | 6       | Describe formative research and/or content and/or usability testing with target group(s) clearly identified, as appropriate                                                                                                                                                                                                                                                                                         |                                |
| User feedback                                              | 7       | Describes user feedback about the intervention or user satisfaction with the intervention. User feedback could include user opinions about content or user interface, their perceptions about usability, access, connectivity, etc                                                                                                                                                                                  |                                |
| Access of individual participants                          | 8       | Mentions barriers or facilitators to the adoption of the intervention among study participants. Relates to individual-level structural, economic and social barriers or facilitators to access such as affordability, and other factors that may limit a user's ability to adopt the intervention                                                                                                                   |                                |
| Cost assessment                                            | 9       | Presents basic costs assessment of the mHealth intervention from varying perspectives. This criterion broadly refers to the reporting of some cost considerations for the mHealth intervention in lieu of a full economic analysis. If a formal economic evaluation has been undertaken, it should be mentioned with appropriate references. Separate reporting criterion are available to guide economic reporting |                                |
| Adoption inputs/ programme entry                           | 10      | Describes how people are informed about the programme including training, if relevant. Includes description of promotional activities and/or training required to implement the mHealth solution among the user population of interest                                                                                                                                                                              |                                |
| Limitations for delivery at scale                          | 11      | Clearly presents mHealth solution limitations for delivery at scale                                                                                                                                                                                                                                                                                                                                                 |                                |
| Contextual adaptability                                    | 12      | Describes the adaptation, or not, of the solution to a different language, different population or context. Any tailoring or modification of the intervention that resulted from pilot testing/usability assessment is described                                                                                                                                                                                    |                                |
| Replicability                                              | 13      | Detailed intervention to support replicability. Clearly presents the source code/screenshots/ flowcharts of the algorithms or examples of messages to support replicability of the mHealth solution in another setting                                                                                                                                                                                              |                                |
| Data security                                              | 14      | Describes the data security procedures/ confidentiality protocols                                                                                                                                                                                                                                                                                                                                                   |                                |
| Compliance with national guidelines or regulatory statutes | 15      | Mechanism used to assure that content or other guidance/information provided by the intervention is in alignment with existing national/regulatory guidelines and is described                                                                                                                                                                                                                                      |                                |
| Fidelity of the intervention                               | 16      | Was the intervention delivered as planned? Describe the strategies employed to assess the fidelity of the intervention. This may include assessment of participant engagement, use of backend data to track message delivery and other technological challenges in the delivery of the intervention                                                                                                                 |                                |

Only

## 14 Ethical considerations

### 14.1 Consent

Written informed consent will be obtained from each study participant prior to full screening assessment. Women aged 16 and 17 years will be considered mature minors and able to consent, without involving parents and guardians due to the sensitive nature of the subject matter.

Informed consent forms will be available in both Kiswahili and English. The informed consent will describe the purpose of the study, the procedures to be followed, and the risks and benefits of participation. A thumbprint witnessed by a person independent from the study staff may replace signature. Volunteers will be provided with a copy of their informed consent forms if they are willing to receive them. Study staff will document the informed consent process.

### 14.2 Confidentiality

All study-related information will be stored securely at the study site. All volunteer information will be stored in locked file cabinets in areas with access limited to study staff. All laboratory specimens, reports, study data collection, process, and administrative forms will be identified by coded number only to maintain volunteer confidentiality. All computer entry and networking programs will also be done by coded number only, and all local databases will be secured with password-protected access systems. Forms, lists, logbooks, appointment books, and any other listings that link Volunteer ID numbers to other identifying information will be stored in a separate, locked file in an area with limited access.

Volunteers' study information will not be released without written permission of the volunteer, except as necessary for data monitoring purposes by Burnet Institute, or regulatory authorities.

Although the study site will make every effort to protect the privacy and confidentiality of all study volunteers, it is possible that volunteers' involvement in the study could become known to others, and that social harms may result. For example, volunteers identified during the study as being HIV-positive could be treated unfairly or discriminated against, or could have problems being accepted by their families and/or communities.

### 14.3 Risks

Study volunteers when undergoing phlebotomy may experience discomfort, feel dizzy or faint, and/or develop a bruise, swelling, or infection where the needle is inserted.

There is a risk that discussion of personal and sensitive topics may result in psychological distress for participants. Questions may trigger memories of past trauma, including previous unintended pregnancies, abortion, relationship difficulties, sexually transmitted infections or physical or sexual violence. These kinds of traumatic experiences are known to be



1  
2  
3 common among FSWs in Kenya. Participants who experience significant distress will be  
4 offered counselling free of charge and/or referral for other relevant services. Participants do  
5 not have to answer any questions if they chose not to, and they are free to withdraw at any  
6 time. This will be emphasised by the researchers during the consent process, and reiterated  
7 during the interview. Breaks will also be offered during the interview if the participant  
8 appears uncomfortable.  
9

10  
11 Volunteers may also become embarrassed, worried, or anxious when completing their HIV-  
12 related interviews and/or receiving HIV counselling. They also may become worried or  
13 anxious while waiting for their HIV test results or after receiving HIV-positive test results.  
14 Trained counsellors will be available to help volunteers deal with these feelings.  
15

16  
17 Although study sites will make every effort to protect participant privacy and confidentiality,  
18 it is possible that volunteers' involvement in the study could become known to others, and  
19 that social harms may result (i.e., because volunteers could become known as sex workers).  
20 A previous randomised trial on integrating mobile phones into medical abortion provision in  
21 South Africa noted that 20% of participants were worried about phone privacy (de Tolly and  
22 Constant 2014).  
23

24  
25 In such events, volunteers could be treated unfairly or discriminated against, or could have  
26 problems being accepted by their families and/or communities. Volunteers also could have  
27 problems in their partner relationships associated with use or attempted use of family  
28 planning methods and/or condoms, as advocated in HIV risk reduction counselling  
29 messages, including the potential for physical, financial, and/or emotional harm. Study staff  
30 will make every effort to facilitate resolution of such problems, including provision of follow-  
31 up counselling for the participant, her partner, or both together as a couple, as well as  
32 providing referrals to other relevant services that may be available in the study site  
33 community.  
34  
35

#### 36 37 38 39 **14.4 Benefits**

40  
41 There may be no direct benefits to volunteers in this study. However, volunteers and others  
42 may benefit in the future from information learned from this study. Study volunteers will  
43 receive syphilis testing, HIV counselling and testing, and will be provided with condoms and  
44 syndromic STI treatment in accordance with WHO guidelines, free-of-charge. Participants  
45 with anaemia (Hb<12.0 g/dL) will be given 1 month's supply of iron and folate supplements.  
46 Those with moderate or severe anaemia will be referred to the district hospital.  
47

48  
49 For other medical conditions identified as part of the study screening and/or follow-up  
50 procedures, volunteers will be referred to other sources care available in their community.  
51

52  
53 At each scheduled study visit, participants will receive a financial reimbursement for  
54 transport costs and time of 400 Kenyan shillings (approximately 5 Australian dollars).  
55  
56  
57  
58  
59  
60

## 15 Study limitations

Sex workers in one study arm may communicate with those in the other arm about the messages received and even share the messages. Women in the two groups may also discuss with each other new knowledge gained or changes in behaviours stemming from the messages received. This would introduce contamination between the two arms, and thus diminish the ability to detect a difference in effectiveness between the two groups. We will attempt to reduce this by recruiting sex workers in clusters, based on the venues where they work. This strategy may only be partially effective as sex workers are a highly mobile population and likely work from several venues. However, as we are recruiting only a portion of sex workers in the area (from 86 out of 511 hot spots), this diminishes the chances of sex workers from each arm interacting with each other. We will attempt to measure this potential bias by asking women if they shared messages with others, and specifically women in the other study arm.

The SRH arm focuses on addressing the sex workers demand for family planning services and on improving the use of contraception they receive (for example by optimising adherence). However, many of the barriers to family planning stem from deficiencies in health services (supply side issues). This may concern stockouts of commodities, providers not offering women a choice of methods, and even health worker disrespect and abuse of patients. The supply-side problems are not directly addressed in the study intervention, and this may limit the potential increases in family planning coverage in this population.

## 16 Qualitative assessment of SRH intervention

An embedded qualitative study will be conducted as part of the intervention evaluation, consisting of one-on-one interviews with a sample of participants in the SRH intervention arm and their emotional partners. The interviews will include both women who become pregnant over the course of the trial as well as those who did not. Similarly, we will include emotional partners of women who did and did not conceive during the trial.

The qualitative enquiry will focus on examining the acceptability and feasibility of the intervention (secondary objective of the SRH intervention; 8.2.2). Interviews will explore both positive and negative attributes of the SRH intervention, and explore in depth how the intervention influenced the attitudes, behaviours and practices of female sex workers relating to sexual risk behaviour, family planning and access to family planning services. Moreover, we will explore how this influenced the relationship between participants and their partner(s). Women in the nutrition arm will not be included in the qualitative interviews.

Fifteen to twenty women who did not become pregnant, and eight to ten women who conceived during the study will be invited to be interviewed. More women who did not conceive will be invited in order to delineate the processes through which the intervention worked. Also, ten to twelve male partner interviews are anticipated. For all sub-populations included in this study component, fewer than the maximum number of interviews will be completed if the study team believes that data saturation has been reached.

### 16.1 Qualitative research specific objectives

1. To assess the feasibility and acceptability of the SRH mHealth intervention
2. To examine if and how the intervention influenced FSWs' attitudes and beliefs about pregnancy risk and prevention, and their degree of control and negotiating power over their sexual relationships, and how these factors influenced their uptake of contraceptives
3. To explore the role of FSWs' emotional partners in facilitating or preventing the uptake of dual method contraceptives, and the influence of the intervention on this role
4. To explore potential risks and benefits of involving emotional partners in future health promotion initiatives aimed at improving FSWs' sexual and reproductive health.

#### 16.1.1 Qualitative research questions

For more detail, see the qualitative research interview guides (annexes 7-9)

##### ***Objective 1 [interviews with women]***

1. Is SMS an acceptable means of providing information about family planning?

2. Did WHISPER reach its target audience appropriately and successfully?
3. How did participants use or act on WHISPER messages, information and advice?
4. How did participants respond to the user interface and mode of delivery?

**Objective 2 [interviews with women]**

1. Why did/didn't women take up contraception or switch methods during the study?  
To what extent were these actions mediated by the WHISPER intervention?
2. [Participants who conceived]: Why do participants think they became pregnant, did this follow a change in contraceptive use, and to what extent was this change influenced by WHISPER?
3. How could WHISPER have provided better information or had a greater influence on pregnancy prevention?
4. How did the use of WHISPER influence FSWs' relationships with emotional partners, clients and health providers?
5. Did FSWs experience any conflict with partners, family, peers or others as a result of being involved in WHISPER?

**Objective 3 [interviews with women and men]**

1. [Men and women]: To what extent were messages shared and discussed with emotional (non-paying) partners?
2. [Men and women]: What role did emotional partners play in pregnancy prevention?  
Did this change during the trial?
3. [Men, if viewed partners' messages or discussed them]: How did men respond to the intervention? What did they like/dislike?
4. [Men]: How did men's attitudes towards pregnancy and their partners' sexual health change during the study?
5. [Women]: To what extent do FSWs want their partners to be involved in pregnancy prevention?

**Objective 4 [interviews with women and men]**

1. [Men]: How interested are emotional partners in FSWs' risk of pregnancy, and to what extent do they want to be involved in pregnancy prevention?
2. [Men]: How could male partners be encouraged to have greater knowledge of pregnancy risk and greater involvement in pregnancy prevention?
3. [Men]: Would male partners want to receive SRH information via mobile?
4. [Women]: what are the risks of involving male partners in an intervention like WHISPER?

## 16.2 Qualitative research methods

### 16.2.1 Qualitative study design

Interviews will be conducted with purposively selected trial participants and a small number of participants' emotional partners. Women who are invited to participate will also be given an invitation letter for their partners. Information provided by women and male partners will not be linked or shared with the participants. Interviews with FSWs will be conducted by trained female researchers, and trained male researchers for interviews with male partners. Interviews will be offered in Swahili or English (as per the participant's preference).

Interview guides have been developed for each participant group ([annexes 5-7](#)). Interviews will be conducted with sufficient time for reflection and discussion between interviews, to facilitate an iterative approach to data collection.

### 16.2.2 Data analysis

Interviews will be transcribed verbatim and translated into English when conducted in Kiswahili. Data will be imported into a qualitative data analysis program, e.g. Nvivo, for thematic analysis. Transcripts will be coded inductively, clustered to reflect emerging themes, and checked for consistency of interpretation.

The qualitative analysis will form part of the broader evaluation of WHISPER, with effectiveness of the intervention determined by assessing primary and secondary quantitative SRH outcomes at 12 months. Qualitative findings will provide a more detailed picture of the acceptability and feasibility of the intervention, provide context to key quantitative findings, and explore participants' responses to the intervention and the mechanisms by which the intervention was or was not effective.

### 16.2.3 Ethical issues

Written informed consent will be separately obtained from all participants invited to participate in the qualitative interviews (consent forms [annex 2](#)). As for the RCT enrolment, 16- and 17- year old volunteers will be considered mature minors and able to consent, without involving parents and guardians due to the sensitive nature of the subject matter. Illiterate volunteers will be eligible to take part, and will consent by providing a thumbprint witnessed by an independent person of their choosing.

Women who are comfortable with their partners being contacted for an interview will be given an invitation letter for their partners. It will explain that the woman and her partner will be interviewed by different researchers and that any information revealed in the interview will not be disclosed to the other partner.

All audio and handwritten data collected from the workshops and interviews will be stored securely. Electronic notes, transcripts and translations will be stored electronically and

1  
2  
3 password-protected. Only members of the qualitative research team will have access to  
4 these documents. Consent forms containing identifying details will be kept physically  
5 separate from the other data collected, and stored in a locked filing cabinet. The informed  
6 consent forms will not reveal the fact that participants are involved in sex work.  
7 Pseudonyms will be allocated to all participants and will be used throughout the analysis  
8 and reporting to protect participants' confidentiality.  
9

### 10 11 *16.2.3.1 Disclosure of sex work status to male participants*

12  
13 To protect the privacy of the FSW participants, the interviewer will not reveal that they  
14 know the sex work status of the male participants' partners. Sex work may be discussed in  
15 the interviews with men generically, but not specifically in relation to their partner. The  
16 study will be presented as one aiming to understand men's views of sexual and reproductive  
17 health, relationships and pregnancy prevention.  
18  
19

### 20 21 *16.2.3.2 Risks of participation*

22  
23 There is a moderate risk that discussion of personal and sensitive topics may result in  
24 psychological distress for participants, in particular FSWs. Memories of past trauma,  
25 including previous unintended pregnancies, abortion, relationship difficulties, sexually  
26 transmitted infections or physical or sexual violence, may be triggered by the discussion.  
27 These kinds of traumatic experiences are known to be common among FSWs in Kenya.  
28 Similar trauma may have been experienced by participants' male partners. The latter may  
29 also have more difficulty discussing topics like SRH and sexual relationships than FSWs, for  
30 whom they are part of working life and discussed among peers.  
31  
32

33  
34 Participants who experience significant distress will be offered counselling free of charge  
35 and/or referral for other relevant services. Participants do not have to answer any questions  
36 if they chose not to, and they are free to withdraw at any time. This will be emphasised by  
37 the researchers during the consent process, and reiterated during the interview. Breaks will  
38 also be offered during the interview if the participant appears uncomfortable.  
39

40  
41 While there is a risk that some participants may become distressed, others may benefit  
42 from the opportunity to talk about personal issues with an independent person in a safe,  
43 private, non-judgmental environment.  
44  
45  
46  
47  
48  
49  
50  
51  
52  
53  
54  
55  
56  
57  
58  
59  
60

## 17 Timeline

It anticipated that study recruitment and enrolment commences on 15 July 2016, with last enrolment anticipated 6 months later and final follow-up visit in December 2017.

| WHISPER-SHOUT Study timelines                                                                             | 2016 |   |   | 2017 |   |   | 2018 |   |  |  |
|-----------------------------------------------------------------------------------------------------------|------|---|---|------|---|---|------|---|--|--|
| Stakeholder/community engagement; protocol & questionnaire design/pre-testing; capacity building/training | ■    | ■ |   |      |   |   |      |   |  |  |
| Ethics approval obtained                                                                                  |      | ■ |   |      |   |   |      |   |  |  |
| Enrolment/collect baseline data, start intervention                                                       |      |   | ■ | ■    |   |   |      |   |  |  |
| Participant follow-up (up to 12 months)                                                                   |      |   | ■ | ■    | ■ | ■ | ■    |   |  |  |
| Data management and data analysis                                                                         |      |   | ■ | ■    | ■ | ■ | ■    | ■ |  |  |
| Dissemination: report writing; stakeholder meetings                                                       |      |   |   |      |   |   |      | ■ |  |  |

## 18 Budget

| Items                                         | Total (KES)       |
|-----------------------------------------------|-------------------|
| Personnel – salaries and salary disbursements | 16,200,000        |
| Other direct research cost                    | 1,145,000         |
| Local travel                                  | 960,000           |
| Participant compensation                      | 1,032,000         |
| Supplies and equipment                        | 1,715,000         |
| Contingency (5%)                              | 1,052,000         |
|                                               |                   |
| <b>TOTAL</b>                                  | <b>22,104,000</b> |

Funding has been obtained by the Burnet Institute from the National Health and Medical Research Council (NHMRC), Australia (GNT1087006 and GNT1090805)

## 19 Annexes

### Information and consent forms

1. Patient information and consent form for cRCT
2. Patient information and consent form for qualitative interviews (women)
3. Patient information and consent form for qualitative interviews (male partners)
4. Invitation letter for male partners
5. Patient information and consent form for Eynaemia mobile application

### Data collection tools

6. Structured questionnaire (month 0)
7. Structured questionnaire (month 6)
8. Structured questionnaire (month 12)
9. Qualitative interview guide for women in SRH arm who did not become pregnant during the trial
10. Qualitative interview guide for women in SRH arm who become pregnant during the trial
11. Qualitative interview guide for boyfriend / husband of women in SRH arm

### Screening and enrolment tools

12. Pre-screening form
13. Referral card
14. Clinical assessment form
15. Eligibility form

### Clinical test forms

16. Point-of-care test result form
17. Laboratory test result form



## 20 References

- Aderibigbe, O.R. (2011). "Associations between indices of iron status, anthropometric and biological markers of cardiovascular disease risk." North-West University.
- African Union (2005). "African regional nutritional strategy 2005-2015."
- Agarwal, S., LeFevre, A. E., Lee, J., L'Engle, K., Mehl, G., Sinha, C. and Labrique, A. (2016). "Guidelines for reporting of health interventions using mobile phones: mobile health (mHealth) evidence reporting and assessment (mERA) checklist." *BMJ*352: i1174.
- Amuyunzu-Nyamongo, M. (2011). Experiences and lessons learned from influencing the social determinants to reduce child under-nutrition in Kenya
- Azadbakht, L., Mirmiran, P., Esmailzadeh, A., Azizi, F. (2006). "Dietary diversity score and cardiovascular risk factors in Tehranian adults." *Public Health Nutrition* 9(6):728-36 · September 2006.
- Baumgartner, J. N., Morroni, C., Mlobeli, R.D., Otterness, C., Myer, L., Janowitz, B., Stanback, J. and Buga G. (2007). "Timeliness of contraceptive reinjections in South Africa and its relation to unintentional discontinuation." *Int FAM Plan Perspect*33 (2): 66-74.
- Bengtson, A., L'Engle, K., Mwarogo, P. and Kingola, N. (2014 Accepted). "Alcohol use and history of reduced HIV testing among female sex workers in Mombasa, Kenya." *AIDS Care*.
- Blanchard, K., Chipato, T., Ramjee, G., Nhemachena, T., and Harper, C.C. (2014). "Clinicians' perceptions and provision of hormonal contraceptives for HIV-positive and at-risk women in Southern Africa: an original research article." *Contraception*90 (4): 391-398.
- Bosire, W., Okal J., Abdallah, S., Chokwe, J., Cherish, M., Nel, A., Temmerman, M., and Luchters, S. (2009). "High rates of unwanted pregnancies in a prospective microbicide preparedness study in Mombasa, Kenya." *Int'l AIDS Society Conference*. Cape Town.
- Bougle, D and Brouard, J. (2013). "Iron in child obesity. Relationships with inflammation and metabolic risk factors." *Nutrients*, 5(19 June), pp.2222–2230.
- Cai, Y., Shi, R., Shen, T. et al (2010). "A study of HIV/AIDS related knowledge, attitude and behaviors among female sex workers in Shanghai China." *BMC Public Health* 10: 377.
- California WIC Program (2002). "Key theories, models, and processes relevant to nutrition education." (July), pp.1–16.
- Chersich, M. F., Bosire, W., King'ola, N., Temmerman, M., and Luchters S. (2014). "Effects of hazardous and harmful alcohol use on HIV incidence and sexual behaviour: a cohort study of Kenyan female sex workers." *Globalization and health* 10(1): 22-22.
- Children's Investment Fund Foundation (2013). "Child growth = sustainable economic growth : why we should invest in nutrition?" Available at: <http://nutrition4growth.org/Growing Economies Policy Brief - Final May 2013.pdf>.

- 1  
2  
3 Claxton, M. (n.d). "Culture, Food, and Identity: Sixth in a Series on culture and development."  
4  
5 Cleland, J., Harbison, S. and Shah, I.H. (2014). "Unmet need for contraception: issues and  
6 challenges." *Stud FAM Plann*45 (2): 105-122.  
7  
8 Cole-Lewis, H. and Kershaw, T. (2010). "Text messaging as a tool for behavior change in disease  
9 prevention and management." *Epidemiologic reviews*32 (1): 56-69.  
10  
11 Darroch, J. E. and Singh, S. (2013). "Trends in contraceptive need and use in developing countries in  
12 2003, 2008, and 2012: an analysis of national surveys." *Lancet*381 (9879): 1756-1762.  
13  
14 de Tolly, K. M. and Constant, D. (2014). "Integrating mobile phones into medical abortion provision:  
15 intervention development, use, and lessons learned from a randomized controlled trial." *JMIR*  
16 *Mhealth Uhealth*2 (1): e5.  
17  
18 Dixon, J., Omwenga, A.M., Friel, S. (2007). "The Health Equity Dimensions of Urban Food  
19 Systems." *Urban Health*, 84(1), pp.118–129.  
20  
21 Fanzo, J. (2012). "The nutrition challenge in Sub-Saharan Africa." United Nations Development  
22 Programme Working paper No. 2012-012. January 2012.  
23  
24 FAO (2015). "Analysis of public expenditure in support of food and agriculture in Kenya, 2006 – 2012.  
25 Technical notes series, MAFAP."  
26  
27 Feucht, U. D., Meyer, A. and Kruger, M. (2014). "Missing HIV prevention opportunities in South  
28 African children--a 7-year review." *BMC Public Health*14: 1265.  
29  
30 Fielding-Miller, R., Minisi, Z., Adams, D. et al., (2014). "There is hunger in my community" : a  
31 qualitative study of food security as a cyclical force in sex work in Swaziland. *BMC Public Health*,  
32 14(79), pp.1–10.  
33  
34 Fjeldsoe, B. S., Marshall, A.L. and Miller, Y.D. (2009). "Behavior change interventions delivered by  
35 mobile telephone short-message service." *American journal of preventive medicine*36 (2): 165-173.  
36  
37 Free, C., Phillips, G., Galli, L., Watson, L., Felix, L., Edwards, P., Patel, V., and Haines, A. (2013). "The  
38 effectiveness of mobile-health technology-based health behaviour change or disease management  
39 interventions for health care consumers: a systematic review." *PLoS medicine*10 (1): e1001362-  
40 e1001362.  
41  
42 Gold, J., Aitken, C. K., Dixon, H. G., Lim, M. S. C., Gouillou, M., Spelman, T., Wakefield, M., and  
43 Hellard, M. E. (2011). "A randomised controlled trial using mobile advertising to promote safer sex  
44 and sun safety to young people." *Health education research* 26(5): 782-794  
45  
46 Government of Kenya, Agricultural Sector Coordination Unit (2011). "National food and nutrition  
47 security policy."  
48  
49 Gross, R., Schoeneberger, H., Pfeifer, H. et al., (2000). "The four dimensions of food and nutrition  
50 security : definitions and concepts." *Nutrition and Food Security*. Pp.1–17.  
51  
52  
53  
54  
55  
56  
57  
58  
59  
60

1  
2  
3 Gutin, S. A., Mlobeli, R., Moss, M., Buga, G., and Morroni, C. (2011). "Survey of knowledge, attitudes  
4 and practices surrounding the intrauterine device in South Africa." *Contraception* 83 (2): 145-150.

5  
6 Hampanda, K.M. (2013). "The social dynamics of selling sex in Mombasa, Kenya: a qualitative study  
7 contextualizing high risk sexual behaviour." *African journal of reproductive health*, 17(2), pp.141–9.  
8 Available at: <http://www.ncbi.nlm.nih.gov/pubmed/24069759>.

9  
10  
11 Henson, S. and Humphrey, J. (2013). "The influence of agro-food policies and programmes on the  
12 availability, affordability, safety and acceptability of food." In *Second International Conference on*  
13 *Nutrition*. pp. 13–15

14  
15 International Telecommunication Union. (2014). "Information and Communication Technology (ICT)  
16 Statistics." Retrieved 17 February, 2014.

17  
18 ITU. (2016). "Information and Communication Technology (ICT) Statistics." from  
19 <http://www.itu.int/en/ITU-D/Statistics/Pages/stat/default.aspx>.

20  
21 Jones P.R., Hunt, M.J., Brown, T.P., Norgan, N.G. (1986). Waist-hip circumference ratio and its  
22 relation to age and overweight in British men. *Human Nutrition. Clinical Nutrition* [1986, 40(3):239-  
23 247]

24  
25 Kennedy, G., Pedro, M.R., Seghieri, C., Nantel G., and Brouweri, I.D. (2009). "Evaluation of dietary  
26 diversity scores for assessment of micronutrient intake and food security in developing countries.  
27 Edited by: Kennedy G, Wageningen, Wageningen University."

28  
29 Kimani-Murage, E.W. (2013). "Exploring the paradox: double burden of malnutrition in rural South  
30 Africa." *School of Public Health, Faculty of Health Sciences, University of the Witwatersrand,*  
31 *Johannesburg, South Africa*. Pp.193–205.

32  
33 Kimani-Murage E.W., Muthuri, S.K., Oti, S.O., Mutua, M.K., van de Vijver, S., Kyobutungi, C. (2015).  
34 Evidence of a Double Burden of Malnutrition in Urban Poor Settings in Nairobi, Kenya. *Plos One*,  
35 10(6), p.e0129943. Available at: <http://dx.plos.org/10.1371/journal.pone.0129943>.

36  
37 Kimani-Murage, E.W., Schofield, L., Wekesah, F., Mohamed, S., Mberu, B., Ettarh, R., Egondi T.,  
38 Kyobutungi, C., and Ezeh, A. (2014). "Vulnerability to food insecurity in urban slums : experiences  
39 from Nairobi, Kenya." *Journal of Urban Health*, August, p.30

40  
41 L'Engle, K., Vahdat, H., Ndakidemi, E. et al (2013). "Evaluating feasibility, reach and potential impact  
42 of a text message family planning information service in Tanzania." *Contraception* 87 (2): 251-256.

43  
44 Li Y., Wedick, N.M., Lai, J., He, Y., Hu, X., Liu, A., Du, S., Zhang, J., Yang, X., Chen, C., Hu, F.B., Ma, G.  
45 (2011). "Lack of dietary diversity and dyslipidaemia among stunted overweight children: the 2002  
46 China National Nutrition and Health Survey." *Public Health Nutrition*. 2011; 14(5): 896-903.

47  
48 Lim, M. S. C., Hocking, J. S., Hellard, M. E., and Aitken, C. K. (2008). "SMS STI: a review of the uses of  
49 mobile phone text messaging in sexual health." *International journal of STD & AIDS* 19 (5): 287-290.

- 1  
2  
3 Lim, M. S., Hocking, J. S., Aitken, C. K., Fairley, C. K., Jordan, L., Lewis, J. A and Hellard, M. E. (2012).  
4 "Impact of text and email messaging on the sexual health of young people: a randomised controlled  
5 trial." *Journal of epidemiology and community health*66 (1): 69-74.  
6  
7 Luchters, S., Bosire, W., Feng, A., Richter, M. L., King'ola, N., Ampt, F., Temmerman, M. and Chersich,  
8 M. F. (under review). "A baby was an added burden." Predictors and consequences of unintended  
9 pregnancies for female sex workers in Mombasa, Kenya: a mixed-methods study.  
10  
11 Luchters, S., Chersich, M. F., Rinyiru, A., Barasa, M. S., King'ola, N., Mandaliya, K., Bosire, W.,  
12 Mwarogo, P., and Temmerman M.(2008). "Impact of five years of peer-mediated interventions on  
13 sexual behavior and STI among female sex workers in Mombasa, Kenya." *BMC Public Health*8: 143.  
14  
15 Luchters, S., Richter, L., Bosire, W., Nelson, G., Kingola, N., Zhang, X. D., Temmerman, M. and  
16 Chersich, M. F. (2013). "The contribution of emotional partners to sexual risk taking and violence  
17 among female sex workers in Mombasa, Kenya: a cohort study." *PLoS ONE*8 (8): e68855  
18  
19 Massyn, N., Day, C., Peer, N., Padarath, A., Barron, P. P. et al., (2014). "District Health Barometer  
20 2013/14. Durban: Health Systems Trust."  
21  
22 M'Baya, B., Mbingwani, I., Mgawi, L., Mkochi, V., Bates, I., White, S. A. and Allain, T. J. (2014).  
23 "Validation of the haemoglobin colour scale for screening blood donors in Malawi." *Malawi Med J*26  
24 (2): 30-33.  
25  
26 Mbochi, R.W., Kuria, E., Kimiywe, J., Ochola, S., and Steyn, S.N., (2012). "Predictors of overweight  
27 and obesity in adult women in Nairobi Province, Kenya." *BMC Public Health*, 12(1), p.823.  
28  
29 Metoyer, A. B. (2009). Racial and socioeconomic disparities in use of long-lasting contraception.  
30 Social Sources of Disparities in Health and Health Care and Linkages to Policy, Population Concerns  
31 and Providers of Care (Research in the Sociology of Health Care, Volume 27). J. J. Ronenfeld, Emerald  
32 Group Publishing Limited: 109-134.  
33  
34 Michalow, J., Chola, L., McGee, S., Tugendhaft, A., Pattinson, R., Kerber, K. and Hofman, K. (2015).  
35 "Triple return on investment: the cost and impact of 13 interventions that could prevent stillbirths  
36 and save the lives of mothers and babies in South Africa." *BMC Pregnancy Childbirth*15 (1): 456.  
37  
38 Moher, D., Schulz, K. F. and Altman, D. G. (2001). "The CONSORT statement: revised  
39 recommendations for improving the quality of reports of parallel-group randomised trials." *Lancet*  
40 357(9263): 1191-1194  
41  
42 Mohiddin, L., Phelps, L. and Walters, T. (2012). "Urban malnutrition : a review of food security and  
43 nutrition among the urban poor." (October).  
44  
45 Moret, W. (2014). "Economic strengthening for Female Sex Workers : a review of the literature."  
46  
47 Morse, J., Chipato, T., Blanchard, K., Nhemachena, T., Ramjee ,G., McCulloch, C., Blum, M., Saleeby,  
48 E. and Harper, C. C. (2013). "Provision of long-acting reversible contraception in HIV-prevalent  
49 countries: results from nationally representative surveys in southern Africa." *Bjog*120 (11): 1386-  
50 1394.  
51  
52  
53  
54  
55  
56  
57  
58  
59  
60

1  
2  
3 Muthoni, M.N. (2014). "Dietary diversity, dietary iron intake and iron status among pregnant women  
4 in Embu County, Kenya." Available at: <http://ir-library.ku.ac.ke/handle/123456789/10757>.

5  
6 Mwangi, M. N., Roth, J.M., Smit, M.R., Trijsburg, L., Mwangi, A.M., Demir, A.Y., Wielders, J.P., Mens,  
7 P.F., Verweij, J.J., Cox, S.E., Prentice, A.M., Brouwer, I.D., Savelkoul, H.F., Andang'o, P.E. and  
8 Verhoef, H. (2015). "Effect of Daily Antenatal Iron Supplementation on Plasmodium Infection in  
9 Kenyan Women: A Randomized Clinical Trial." *Jama* 314(10): 1009-1020.

10  
11 NASCOP (2015). "Algorithms for Managing Common STI Syndromes". National AIDS & STI Control  
12 Programme, Nairobi.

13  
14 National AIDS & STI Control Programme (NASCOP) and National AIDS Council (NAC) (2012).  
15 "Geographic Mapping of Most at Risk Populations for HIV (MARPs) in Kenya."

16  
17 National Planning Commission of Nepal (2012). Multi-sector nutrition plan for Accelerating the  
18 Reduction of Maternal and Child 2013-2017 (2023).

19  
20 Neal, N., Schrader, T., Hyndman, J., Boyce, B., Phillips, D., Smith, R., Sushi, F., Genovese, J., Ricciardi,  
21 M., MacVicar, K. and S. Mukkath, S. (2014). "Street based sex workers needs assessment survey,  
22 Toronto, Barrie, Oshawa."

23  
24 Nguyen, B., Kornman, K. P and Baur, L. A. (2011). "A review of electronic interventions for  
25 prevention and treatment of overweight and obesity in young people." *Obes Rev*12 (5): e298-314.

26  
27 Njue, C., Voeten, H.A., and Remes, P. (2011). "Porn video shows, local brew, and transactional sex:  
28 HIV risk among youth in Kisumu, Kenya." *BMC public health*, 11(September 2015), p.635.

29  
30 Noar, S. M., Palmgreen, P., Chabot, M., Dobransky, N. and Zimmerman, R. S. (2009). "A 10-year  
31 systematic review of HIV/AIDS mass communication campaigns: Have we made progress?" *Journal*  
32 *of health communication* 14(1): 15-42.

33  
34 Oldewage-Theron, W.H., Egal, A. A. and Grobler, C. (2014). "Is overweight and obesity associated  
35 with iron status in low-income men and women ? A case study from Qwa, South Africa." *Integrative*  
36 *Food, Nutrition and Metabolism*, 1(2), pp.1–6.

37  
38 Oyefara, J.L. (2007). "Food insecurity, HIV / AIDS pandemic and sexual behaviour of female  
39 commercial sex workers in Lagos metropolis, Nigeria." *SAHARA- J: Journal of Social Aspects of*  
40 *HIV/AIDS*, 4(2), pp.626–635.

41  
42 Pack, A. P., L'Engle, K., Mwarogo, P. and Kingola, N. (2013). "Intimate partner violence against female  
43 sex workers in Mombasa, Kenya." *Culture, health & sexuality*.

44  
45 Popkin B.M. (2002). "The nutrition transition in developing world." *Development policy review* 2003,  
46 21 (5-6): 581-587

47  
48 Rah, J.H., Akhter, N., Semba, R.D., De Pee, S., Bloem, M.W., Campbell, A.A., Moench-Pfanner, R.,  
49 Sun, K., Badham, J., and Kraemer, K. (2010). "Low dietary diversity is a predictor of child stunting in  
50 rural Bangladesh." *European Journal of Clinical Nutrition* (2010) 64, 1393–1398.

1  
2  
3 Republic of Kenya (2009). "Clinical Guidelines for Management and Referral of Common Conditions  
4 at Levels 2–3: Primary Care." Nairobi: Ministry of Medical Services and Ministry of Public Health and  
5 Sanitation.  
6

7 Republic of Kenya (2015). "Kenya Demographic and Health Survey 2014."  
8

9 Republic of Kenya Parliamentary Service Commission & Parliamentary Budget Office (2015).  
10 "Unpacking the budget policy statement 2015/16 and the medium term, Nairobi."  
11

12 Rigby, N. (2006). "Commentary: Counterpoint to campos et al." *International journal of epidemiology*  
13 (2006) 35, 1: 79-80.  
14

15 Rohner, F., Northrop-Clewes, C., Tschannen, A.B. (2016). "Prevalence and public health relevance of  
16 micronutrient deficiencies and undernutrition in pre-school children and ^ cote d ' Ivoire , West  
17 Africa women of reproductive age." In *Public Health Nutrition*, 17(9), pp.2016–2028.  
18

19 Ross, J. A. and Agwanda, A. T. (2012). "Increased use of injectable contraception in sub-Saharan  
20 Africa." *Afr J Reprod Health*16 (4): 68-80.  
21

22 Scorgie, F., Chersich, M. F., Ntaganira, I., Gerbase, A., Lule, F., and Lo, Y.R. (2012). "Socio-  
23 demographic characteristics and behavioral risk factors of female sex workers in sub-saharan Africa:  
24 a systematic review." *AIDS and behavior*16 (4): 920-933.  
25

26 Singh, S., Darroch, J. E., and Ashford, L. S. (2014). "Adding it up: The costs and benefits of investing  
27 in sexual and reproductive health 2014." New York, Guttmacher Institute.  
28

29 Smit, J. A. and Beksinska, M. E. (2013). "Hormonal contraceptive continuation and switching in  
30 South Africa: implications for evaluating the association of injectable hormonal contraceptive use  
31 and HIV." *J Acquir Immune Defic Syndr*62 (3): 363-365.  
32

33 Smith, A. (2003). "Not an Indian tradition: the sexual colonization of native peoples." *Hypatia*18 (2):  
34 70-85.  
35

36 Steyn, N. P., Nel, J. H., Nantel, G., Kennedy, G. (2006). "Labadarios D.Food variety and dietary  
37 diversity scores in children: are they good indicators of dietary adequacy?" *Public Health Nutr.* 2006  
38 Aug; 9(5):644-50.  
39

40 Stoltzfus, R.J. and Dreyfuss, M.L. (n.d). "Guidelines for the use of iron supplements to prevent and  
41 treat iron deficiency anemia."  
42

43 Sutherland, E. G., Alaii, J., Tsui, S., Luchters, S., Okal, J., King'ola, N., Temmerman, M. and Janowitz,  
44 B. (2011). "Contraceptive needs of female sex workers in Kenya - a cross-sectional study." *The*  
45 *European journal of contraception & reproductive health care: the official journal of the European*  
46 *Society of Contraception*16 (3): 173-182.  
47

48 Tait, C. A. (2000). "A study of the service needs of pregnant addicted women in Manitoba." from  
49 [http://www.gov.mb.ca/health/documents/PWHCE\\_June2000.pdf](http://www.gov.mb.ca/health/documents/PWHCE_June2000.pdf).  
50

51 Thomsen, S. C., Ombidi, W. , Toroitich-Ruto,C., Wong, E. L. , Tucker,H. O. , Homan, R. , Kingola, N. ,  
52 and Luchters, S. (2006). "A prospective study assessing the effects of introducing the female  
53  
54  
55  
56  
57  
58  
59  
60

1  
2  
3 condom in a sex worker population in Mombasa, Kenya." *Sexually transmitted infections*82 (5): 397-  
4 402.

5  
6 Timothy, G., Roche, A. F., Martorell, R. (1988). "Anthropometric standardization reference manual.

7  
8 Torheim, L.E., Ferguson, E.L., Penrose, K., Arimond, M. (2010). "Women in resource-poor settings are  
9 at risk of inadequate intakes of multiple micronutrients." *The Journal of nutrition*, 140(11), p.2051S-  
10 8S.

11  
12 Tsai, A.C., Hung, K.J., and Weiser, S.D. (2012). "Is food insecurity associated with HIV risk? Cross-  
13 sectional evidence from sexually active women in Brazil." *Plos Medicine*, 9(4).

14  
15 United Nations (UN) Department of Economic and Social Affairs Population Division "Model-based  
16 estimates and projections of family planning indicators." 2013 revision.

17  
18 United Nations Development Programme (UNDP) (2015). "Sustainable Development Goals."

19  
20 Vahdat, H. L., L'Engle, K. L., Plourde, K. F., L. Magaria and Olawo, A. (2013). "There are some  
21 questions you may not ask in a clinic: providing contraception information to young people in Kenya  
22 using SMS." *International journal of gynaecology and obstetrics: the official organ of the*  
23 *International Federation of Gynaecology and Obstetrics*123 Suppl: e2-6.

24  
25 Vandepitte, J., Lyerla, R., Dallabetta, G., Crabbé, F., Alary M., and Buvé, A. (2006). "Estimates of the  
26 number of female sex workers in different regions of the world." *Sexually transmitted infections*82  
27 Suppl 3: iii18-25

28  
29 Volscho, T. (2011). "Racism and Disparities in Women's Use of the Depo-Provera Injection in the  
30 Contemporary USA." *Critical Sociology*37 (5): 673-688.

31  
32 Waldman, L., Stevens, M., (2015). "Sexual and reproductive health and rights and mHealth in policy  
33 and practice in South Africa." *Reprod Health Matters*23 (45): 93-102.

34  
35 WHO (2003). "Chronic diseases in developing Countries health and economic burdens."

36  
37 WHO (2011). "Waist circumference and waist to hip ratio." Report of a WHO expert consultation.  
38 Geneva. 8-11th September 2008.

39  
40 WHO (2015). "The global prevalence of anaemia in 2011." Geneva: World Health Organization.

41  
42 World Food Programme (2005). "A Manual: Measuring and Interpreting Malnutrition and Mortality."

43  
44 World Health Organization & Food and Agricultural Organization of the United Nations (2006).  
45 "Guidelines on food fortification with micronutrients. "Edited by Lindsay, A., B. de Benoist, D. Omar  
46 and H. Richard.

47  
48 World Health Organization (1995). "Physical Status. The use and interpretation of anthropometry."  
49 Report of a WHO expert committee, WHO technical report series 854, WHO, Geneva.

50  
51 World Health Organization (2001). "Iron deficiency anaemia Assessment, prevention, and control: a  
52 guide for programme managers."

1  
2  
3  
4  
5  
6  
7  
8  
9  
10  
11  
12  
13  
14  
15  
16  
17  
18  
19  
20  
21  
22  
23  
24  
25  
26  
27  
28  
29  
30  
31  
32  
33  
34  
35  
36  
37  
38  
39  
40  
41  
42  
43  
44  
45  
46  
47  
48  
49  
50  
51  
52  
53  
54  
55  
56  
57  
58  
59  
60

For peer review only



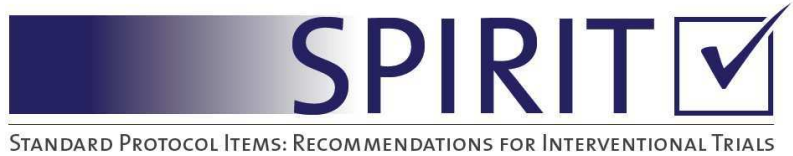

1  
2  
3  
4  
5  
6  
7  
8  
9  
10  
11  
12  
13  
14  
15  
16  
17  
18  
19  
20  
21  
22  
23  
24  
25  
26  
27  
28  
29  
30  
31  
32  
33  
34  
35  
36  
37  
38  
39  
40  
41  
42  
43  
44  
45  
46  
47  
48  
49

SPIRIT 2013 Checklist: Recommended items to address in a clinical trial protocol and related documents\*

| Section/item                      | Item No | Description                                                                                                                                                                                                                                                                              | Addressed on page number |
|-----------------------------------|---------|------------------------------------------------------------------------------------------------------------------------------------------------------------------------------------------------------------------------------------------------------------------------------------------|--------------------------|
| <b>Administrative information</b> |         |                                                                                                                                                                                                                                                                                          |                          |
| Title                             | 1       | Descriptive title identifying the study design, population, interventions, and, if applicable, trial acronym                                                                                                                                                                             | ___ 1 ___                |
| Trial registration                | 2a      | Trial identifier and registry name. If not yet registered, name of intended registry                                                                                                                                                                                                     | ___ 2 ___                |
|                                   | 2b      | All items from the World Health Organization Trial Registration Data Set                                                                                                                                                                                                                 | _____                    |
| Protocol version                  | 3       | Date and version identifier                                                                                                                                                                                                                                                              | ___ 14 ___               |
| Funding                           | 4       | Sources and types of financial, material, and other support                                                                                                                                                                                                                              | ___ 16 ___               |
| Roles and responsibilities        | 5a      | Names, affiliations, and roles of protocol contributors                                                                                                                                                                                                                                  | ___ 16 ___               |
|                                   | 5b      | Name and contact information for the trial sponsor                                                                                                                                                                                                                                       | ___ 16 ___               |
|                                   | 5c      | Role of study sponsor and funders, if any, in study design; collection, management, analysis, and interpretation of data; writing of the report; and the decision to submit the report for publication, including whether they will have ultimate authority over any of these activities | ___ 16 ___               |
|                                   | 5d      | Composition, roles, and responsibilities of the coordinating centre, steering committee, endpoint adjudication committee, data management team, and other individuals or groups overseeing the trial, if applicable (see Item 21a for data monitoring committee)                         | ___ N/A ___              |

1  
2  
3 **Introduction**  
4

|                            |    |                                                                                                                                                                                                           |           |
|----------------------------|----|-----------------------------------------------------------------------------------------------------------------------------------------------------------------------------------------------------------|-----------|
| 5 Background and rationale | 6a | Description of research question and justification for undertaking the trial, including summary of relevant studies (published and unpublished) examining benefits and harms for each intervention        | ___4-6___ |
|                            | 6b | Explanation for choice of comparators                                                                                                                                                                     | ___3,6___ |
| 10 Objectives              | 7  | Specific objectives or hypotheses                                                                                                                                                                         | ___7___   |
| 12 Trial design            | 8  | Description of trial design including type of trial (eg, parallel group, crossover, factorial, single group), allocation ratio, and framework (eg, superiority, equivalence, noninferiority, exploratory) | ___7___   |

15  
16 **Methods: Participants, interventions, and outcomes**  
17

|                         |     |                                                                                                                                                                                                                                                                                                                                                                                |             |
|-------------------------|-----|--------------------------------------------------------------------------------------------------------------------------------------------------------------------------------------------------------------------------------------------------------------------------------------------------------------------------------------------------------------------------------|-------------|
| 18 Study setting        | 9   | Description of study settings (eg, community clinic, academic hospital) and list of countries where data will be collected. Reference to where list of study sites can be obtained                                                                                                                                                                                             | ___9,10___  |
| 21 Eligibility criteria | 10  | Inclusion and exclusion criteria for participants. If applicable, eligibility criteria for study centres and individuals who will perform the interventions (eg, surgeons, psychotherapists)                                                                                                                                                                                   | ___10___    |
| 24 Interventions        | 11a | Interventions for each group with sufficient detail to allow replication, including how and when they will be administered                                                                                                                                                                                                                                                     | ___8,9___   |
|                         | 11b | Criteria for discontinuing or modifying allocated interventions for a given trial participant (eg, drug dose change in response to harms, participant request, or improving/worsening disease)                                                                                                                                                                                 | ___N/A___   |
|                         | 11c | Strategies to improve adherence to intervention protocols, and any procedures for monitoring adherence (eg, drug tablet return, laboratory tests)                                                                                                                                                                                                                              | ___N/A___   |
|                         | 11d | Relevant concomitant care and interventions that are permitted or prohibited during the trial                                                                                                                                                                                                                                                                                  | ___N/A___   |
| 35 Outcomes             | 12  | Primary, secondary, and other outcomes, including the specific measurement variable (eg, systolic blood pressure), analysis metric (eg, change from baseline, final value, time to event), method of aggregation (eg, median, proportion), and time point for each outcome. Explanation of the clinical relevance of chosen efficacy and harm outcomes is strongly recommended | ___13___    |
| 41 Participant timeline | 13  | Time schedule of enrolment, interventions (including any run-ins and washouts), assessments, and visits for participants. A schematic diagram is highly recommended (see Figure)                                                                                                                                                                                               | ___10-12___ |

1  
2  
3 Sample size 14 Estimated number of participants needed to achieve study objectives and how it was determined, including \_\_\_\_\_13\_\_\_\_\_

4 clinical and statistical assumptions supporting any sample size calculations

5  
6 Recruitment 15 Strategies for achieving adequate participant enrolment to reach target sample size \_\_\_\_\_11\_\_\_\_\_

7  
8 **Methods: Assignment of interventions (for controlled trials)**

9  
10 Allocation:

11  
12 Sequence generation 16a Method of generating the allocation sequence (eg, computer-generated random numbers), and list of any \_\_\_\_\_10-11\_\_\_\_\_

13 factors for stratification. To reduce predictability of a random sequence, details of any planned restriction  
14 (eg, blocking) should be provided in a separate document that is unavailable to those who enrol participants  
15 or assign interventions

16  
17 Allocation concealment mechanism 16b Mechanism of implementing the allocation sequence (eg, central telephone; sequentially numbered, \_\_\_\_\_10-11\_\_\_\_\_

18 opaque, sealed envelopes), describing any steps to conceal the sequence until interventions are assigned

19  
20 Implementation 16c Who will generate the allocation sequence, who will enrol participants, and who will assign participants to \_\_\_\_\_11\_\_\_\_\_

21 interventions

22 Blinding (masking) 17a Who will be blinded after assignment to interventions (eg, trial participants, care providers, outcome \_\_\_\_\_11\_\_\_\_\_

23 assessors, data analysts), and how

24  
25 17b If blinded, circumstances under which unblinding is permissible, and procedure for revealing a participant's \_\_\_\_\_N/A\_\_\_\_\_

26 allocated intervention during the trial

27  
28  
29  
30  
31  
32 **Methods: Data collection, management, and analysis**

33  
34 Data collection methods 18a Plans for assessment and collection of outcome, baseline, and other trial data, including any related \_\_\_\_\_11-12\_\_\_\_\_

35 processes to promote data quality (eg, duplicate measurements, training of assessors) and a description of  
36 study instruments (eg, questionnaires, laboratory tests) along with their reliability and validity, if known.  
37 Reference to where data collection forms can be found, if not in the protocol

38  
39 18b Plans to promote participant retention and complete follow-up, including list of any outcome data to be \_\_\_\_\_N/A\_\_\_\_\_

40 collected for participants who discontinue or deviate from intervention protocols

|    |                                 |     |                                                                                                                                                                                                                                                                                                                                       |             |
|----|---------------------------------|-----|---------------------------------------------------------------------------------------------------------------------------------------------------------------------------------------------------------------------------------------------------------------------------------------------------------------------------------------|-------------|
| 1  |                                 |     |                                                                                                                                                                                                                                                                                                                                       |             |
| 2  |                                 |     |                                                                                                                                                                                                                                                                                                                                       |             |
| 3  | Data management                 | 19  | Plans for data entry, coding, security, and storage, including any related processes to promote data quality (eg, double data entry; range checks for data values). Reference to where details of data management procedures can be found, if not in the protocol                                                                     | ___ 12, ___ |
| 4  |                                 |     |                                                                                                                                                                                                                                                                                                                                       |             |
| 5  |                                 |     |                                                                                                                                                                                                                                                                                                                                       |             |
| 6  |                                 |     |                                                                                                                                                                                                                                                                                                                                       |             |
| 7  | Statistical methods             | 20a | Statistical methods for analysing primary and secondary outcomes. Reference to where other details of the statistical analysis plan can be found, if not in the protocol                                                                                                                                                              | ___ 13 ___  |
| 8  |                                 |     |                                                                                                                                                                                                                                                                                                                                       |             |
| 9  |                                 |     |                                                                                                                                                                                                                                                                                                                                       |             |
| 10 |                                 | 20b | Methods for any additional analyses (eg, subgroup and adjusted analyses)                                                                                                                                                                                                                                                              | ___ 13 ___  |
| 11 |                                 |     |                                                                                                                                                                                                                                                                                                                                       |             |
| 12 |                                 | 20c | Definition of analysis population relating to protocol non-adherence (eg, as randomised analysis), and any statistical methods to handle missing data (eg, multiple imputation)                                                                                                                                                       | ___ 13 ___  |
| 13 |                                 |     |                                                                                                                                                                                                                                                                                                                                       |             |
| 14 |                                 |     |                                                                                                                                                                                                                                                                                                                                       |             |
| 15 |                                 |     |                                                                                                                                                                                                                                                                                                                                       |             |
| 16 | <b>Methods: Monitoring</b>      |     |                                                                                                                                                                                                                                                                                                                                       |             |
| 17 |                                 |     |                                                                                                                                                                                                                                                                                                                                       |             |
| 18 | Data monitoring                 | 21a | Composition of data monitoring committee (DMC); summary of its role and reporting structure; statement of whether it is independent from the sponsor and competing interests; and reference to where further details about its charter can be found, if not in the protocol. Alternatively, an explanation of why a DMC is not needed | ___ N/A ___ |
| 19 |                                 |     |                                                                                                                                                                                                                                                                                                                                       |             |
| 20 |                                 |     |                                                                                                                                                                                                                                                                                                                                       |             |
| 21 |                                 |     |                                                                                                                                                                                                                                                                                                                                       |             |
| 22 |                                 |     |                                                                                                                                                                                                                                                                                                                                       |             |
| 23 |                                 | 21b | Description of any interim analyses and stopping guidelines, including who will have access to these interim results and make the final decision to terminate the trial                                                                                                                                                               | ___ N/A ___ |
| 24 |                                 |     |                                                                                                                                                                                                                                                                                                                                       |             |
| 25 |                                 |     |                                                                                                                                                                                                                                                                                                                                       |             |
| 26 | Harms                           | 22  | Plans for collecting, assessing, reporting, and managing solicited and spontaneously reported adverse events and other unintended effects of trial interventions or trial conduct                                                                                                                                                     | ___ 13 ___  |
| 27 |                                 |     |                                                                                                                                                                                                                                                                                                                                       |             |
| 28 |                                 |     |                                                                                                                                                                                                                                                                                                                                       |             |
| 29 | Auditing                        | 23  | Frequency and procedures for auditing trial conduct, if any, and whether the process will be independent from investigators and the sponsor                                                                                                                                                                                           | ___ N/A ___ |
| 30 |                                 |     |                                                                                                                                                                                                                                                                                                                                       |             |
| 31 |                                 |     |                                                                                                                                                                                                                                                                                                                                       |             |
| 32 |                                 |     |                                                                                                                                                                                                                                                                                                                                       |             |
| 33 | <b>Ethics and dissemination</b> |     |                                                                                                                                                                                                                                                                                                                                       |             |
| 34 |                                 |     |                                                                                                                                                                                                                                                                                                                                       |             |
| 35 | Research ethics approval        | 24  | Plans for seeking research ethics committee/institutional review board (REC/IRB) approval                                                                                                                                                                                                                                             | ___ 14 ___  |
| 36 |                                 |     |                                                                                                                                                                                                                                                                                                                                       |             |
| 37 |                                 |     |                                                                                                                                                                                                                                                                                                                                       |             |
| 38 | Protocol amendments             | 25  | Plans for communicating important protocol modifications (eg, changes to eligibility criteria, outcomes, analyses) to relevant parties (eg, investigators, REC/IRBs, trial participants, trial registries, journals, regulators)                                                                                                      | ___ N/A ___ |
| 39 |                                 |     |                                                                                                                                                                                                                                                                                                                                       |             |
| 40 |                                 |     |                                                                                                                                                                                                                                                                                                                                       |             |
| 41 |                                 |     |                                                                                                                                                                                                                                                                                                                                       |             |
| 42 |                                 |     |                                                                                                                                                                                                                                                                                                                                       |             |
| 43 |                                 |     |                                                                                                                                                                                                                                                                                                                                       |             |
| 44 |                                 |     |                                                                                                                                                                                                                                                                                                                                       |             |
| 45 |                                 |     |                                                                                                                                                                                                                                                                                                                                       |             |
| 46 |                                 |     |                                                                                                                                                                                                                                                                                                                                       |             |
| 47 |                                 |     |                                                                                                                                                                                                                                                                                                                                       |             |
| 48 |                                 |     |                                                                                                                                                                                                                                                                                                                                       |             |
| 49 |                                 |     |                                                                                                                                                                                                                                                                                                                                       |             |

|    |                               |     |                                                                                                                                                                                                                                                                                     |             |
|----|-------------------------------|-----|-------------------------------------------------------------------------------------------------------------------------------------------------------------------------------------------------------------------------------------------------------------------------------------|-------------|
| 1  |                               |     |                                                                                                                                                                                                                                                                                     |             |
| 2  |                               |     |                                                                                                                                                                                                                                                                                     |             |
| 3  | Consent or assent             | 26a | Who will obtain informed consent or assent from potential trial participants or authorised surrogates, and how (see Item 32)                                                                                                                                                        | ___13___    |
| 4  |                               |     |                                                                                                                                                                                                                                                                                     |             |
| 5  |                               |     |                                                                                                                                                                                                                                                                                     |             |
| 6  |                               | 26b | Additional consent provisions for collection and use of participant data and biological specimens in ancillary studies, if applicable                                                                                                                                               | ___13___    |
| 7  |                               |     |                                                                                                                                                                                                                                                                                     |             |
| 8  |                               |     |                                                                                                                                                                                                                                                                                     |             |
| 9  | Confidentiality               | 27  | How personal information about potential and enrolled participants will be collected, shared, and maintained in order to protect confidentiality before, during, and after the trial                                                                                                | ___13-14___ |
| 10 |                               |     |                                                                                                                                                                                                                                                                                     |             |
| 11 |                               |     |                                                                                                                                                                                                                                                                                     |             |
| 12 | Declaration of interests      | 28  | Financial and other competing interests for principal investigators for the overall trial and each study site                                                                                                                                                                       | ___16___    |
| 13 |                               |     |                                                                                                                                                                                                                                                                                     |             |
| 14 |                               |     |                                                                                                                                                                                                                                                                                     |             |
| 15 | Access to data                | 29  | Statement of who will have access to the final trial dataset, and disclosure of contractual agreements that limit such access for investigators                                                                                                                                     | ___16___    |
| 16 |                               |     |                                                                                                                                                                                                                                                                                     |             |
| 17 |                               |     |                                                                                                                                                                                                                                                                                     |             |
| 18 | Ancillary and post-trial care | 30  | Provisions, if any, for ancillary and post-trial care, and for compensation to those who suffer harm from trial participation                                                                                                                                                       | ___N/A___   |
| 19 |                               |     |                                                                                                                                                                                                                                                                                     |             |
| 20 |                               |     |                                                                                                                                                                                                                                                                                     |             |
| 21 | Dissemination policy          | 31a | Plans for investigators and sponsor to communicate trial results to participants, healthcare professionals, the public, and other relevant groups (eg, via publication, reporting in results databases, or other data sharing arrangements), including any publication restrictions | ___N/A___   |
| 22 |                               |     |                                                                                                                                                                                                                                                                                     |             |
| 23 |                               |     |                                                                                                                                                                                                                                                                                     |             |
| 24 |                               |     |                                                                                                                                                                                                                                                                                     |             |
| 25 |                               |     |                                                                                                                                                                                                                                                                                     |             |
| 26 |                               | 31b | Authorship eligibility guidelines and any intended use of professional writers                                                                                                                                                                                                      | ___N/A___   |
| 27 |                               |     |                                                                                                                                                                                                                                                                                     |             |
| 28 |                               | 31c | Plans, if any, for granting public access to the full protocol, participant-level dataset, and statistical code                                                                                                                                                                     | ___N/A___   |
| 29 |                               |     |                                                                                                                                                                                                                                                                                     |             |
| 30 | <b>Appendices</b>             |     |                                                                                                                                                                                                                                                                                     |             |
| 31 |                               |     |                                                                                                                                                                                                                                                                                     |             |
| 32 | Informed consent materials    | 32  | Model consent form and other related documentation given to participants and authorised surrogates                                                                                                                                                                                  | ___N/A___   |
| 33 |                               |     |                                                                                                                                                                                                                                                                                     |             |
| 34 |                               |     |                                                                                                                                                                                                                                                                                     |             |
| 35 | Biological specimens          | 33  | Plans for collection, laboratory evaluation, and storage of biological specimens for genetic or molecular analysis in the current trial and for future use in ancillary studies, if applicable                                                                                      | ___11-12___ |
| 36 |                               |     |                                                                                                                                                                                                                                                                                     |             |
| 37 |                               |     |                                                                                                                                                                                                                                                                                     |             |

\*It is strongly recommended that this checklist be read in conjunction with the SPIRIT 2013 Explanation & Elaboration for important clarification on the items. Amendments to the protocol should be tracked and dated. The SPIRIT checklist is copyrighted by the SPIRIT Group under the Creative Commons "[Attribution-NonCommercial-NoDerivs 3.0 Unported](https://creativecommons.org/licenses/by-nc-nd/3.0/)" license.

# BMJ Open

## WHISPER or SHOUT study: Protocol of a cluster-randomised controlled trial assessing mHealth sexual reproductive health and nutrition interventions among female sex workers in Mombasa, Kenya



|                                 |                                                                                                                                                                                                                                                                                                                                                                                                                                                                                                                                                                                                                                                                                                                                                                                                                                                                                                                                                                                                                                                                                                                                                                              |
|---------------------------------|------------------------------------------------------------------------------------------------------------------------------------------------------------------------------------------------------------------------------------------------------------------------------------------------------------------------------------------------------------------------------------------------------------------------------------------------------------------------------------------------------------------------------------------------------------------------------------------------------------------------------------------------------------------------------------------------------------------------------------------------------------------------------------------------------------------------------------------------------------------------------------------------------------------------------------------------------------------------------------------------------------------------------------------------------------------------------------------------------------------------------------------------------------------------------|
| Journal:                        | <i>BMJ Open</i>                                                                                                                                                                                                                                                                                                                                                                                                                                                                                                                                                                                                                                                                                                                                                                                                                                                                                                                                                                                                                                                                                                                                                              |
| Manuscript ID                   | bmjopen-2017-017388.R1                                                                                                                                                                                                                                                                                                                                                                                                                                                                                                                                                                                                                                                                                                                                                                                                                                                                                                                                                                                                                                                                                                                                                       |
| Article Type:                   | Protocol                                                                                                                                                                                                                                                                                                                                                                                                                                                                                                                                                                                                                                                                                                                                                                                                                                                                                                                                                                                                                                                                                                                                                                     |
| Date Submitted by the Author:   | 23-Jun-2017                                                                                                                                                                                                                                                                                                                                                                                                                                                                                                                                                                                                                                                                                                                                                                                                                                                                                                                                                                                                                                                                                                                                                                  |
| Complete List of Authors:       | <p>Ampt, Frances; Burnet Institute; Monash University, Department of Epidemiology and Preventive Medicine<br/> Mudogo, Collins; International Centre for Reproductive Health Kenya<br/> Gichangi, Peter; International Centre for Reproductive Health Kenya; University of Nairobi<br/> Lim, Megan; Burnet Institute; Monash University, Department of Epidemiology and Preventive Medicine<br/> Manguro, Griffins; International Centre for Reproductive Health Kenya<br/> Chersich, Matthew<br/> Jaoko, Walter; University of Nairobi<br/> Temmerman, Marleen; Aga Khan University - Kenya; International Centre for Reproductive Health<br/> Laini, Marilyn; International Centre for Reproductive Health Kenya<br/> Comrie-Thomson, Elizabeth; Burnet Institute; Monash University, Department of Epidemiology and Preventive Medicine<br/> Stoové, MA; Burnet Institute,<br/> Agius, Paul; Burnet Institute; Monash University, Department of Epidemiology and Preventive Medicine<br/> Hellard, Margaret; Burnet Institute<br/> L'Engle, Kelly; University of San Francisco<br/> Luchters, Stanley; Burnet Institute; International Centre for Reproductive Health</p> |
| <b>Primary Subject Heading</b>: | Global health                                                                                                                                                                                                                                                                                                                                                                                                                                                                                                                                                                                                                                                                                                                                                                                                                                                                                                                                                                                                                                                                                                                                                                |
| Secondary Subject Heading:      | Communication, Nutrition and metabolism, Obstetrics and gynaecology, Public health                                                                                                                                                                                                                                                                                                                                                                                                                                                                                                                                                                                                                                                                                                                                                                                                                                                                                                                                                                                                                                                                                           |
| Keywords:                       | Community gynaecology < GYNAECOLOGY, Anaemia < HAEMATOLOGY, International health services < HEALTH SERVICES ADMINISTRATION & MANAGEMENT, NUTRITION & DIETETICS, PUBLIC HEALTH                                                                                                                                                                                                                                                                                                                                                                                                                                                                                                                                                                                                                                                                                                                                                                                                                                                                                                                                                                                                |
|                                 |                                                                                                                                                                                                                                                                                                                                                                                                                                                                                                                                                                                                                                                                                                                                                                                                                                                                                                                                                                                                                                                                                                                                                                              |

1  
2  
3  
4  
5  
6  
7  
8  
9  
10  
11  
12  
13  
14  
15  
16  
17  
18  
19  
20  
21  
22  
23  
24  
25  
26  
27  
28  
29  
30  
31  
32  
33  
34  
35  
36  
37  
38  
39  
40  
41  
42  
43  
44  
45  
46  
47  
48  
49  
50  
51  
52  
53  
54  
55  
56  
57  
58  
59  
60

For peer review only

1  
2  
3 **1 WHISPER or SHOUT study: Protocol of a cluster-randomised controlled trial**  
4 **2 assessing mHealth sexual reproductive health and nutrition interventions among**  
5 **3 female sex workers in Mombasa, Kenya**  
6  
7

8  
9  
10  
11  
12  
13  
14  
15  
16  
17  
18  
19  
20  
21  
22  
23  
24  
25  
26  
27  
28  
29  
30  
31  
32  
33  
34  
35  
36  
37  
38  
39  
40  
41  
42  
43  
44  
45  
46  
47  
48  
49  
50  
51  
52  
53  
54  
55  
56  
57  
58  
59  
60

5 Frances H. Ampt\*<sup>1,2</sup>, Collins Mudogo\*<sup>3</sup>, Peter Gichangi<sup>3,4,7</sup>, Megan S.C. Lim<sup>1,2</sup>, Griffins  
6 Manguro<sup>3</sup>, Matthew Chersich<sup>5</sup>, Walter Jaoko<sup>4</sup>, Marleen Temmerman<sup>3,6,7</sup>, Marilyn  
7 Laini<sup>3</sup>, Liz Comrie-Thomson<sup>1</sup>, Mark Stoové<sup>1</sup>, Paul A. Agius<sup>1,2,8</sup>, Margaret Hellard<sup>1</sup>, Kelly  
8 L'Engle<sup>9</sup>, Stanley Luchters<sup>1,2,7</sup>

9  
10 **Affiliations:**

- 11 1. Burnet Institute, Australia  
12 2. Department of Epidemiology and Preventive Medicine, Monash University,  
13 Australia  
14 3. International Centre for Reproductive Health (ICRH), Kenya  
15 4. University of Nairobi, Kenya  
16 5. Wits Reproductive Health and HIV Institute, Faculty of Health Sciences, University  
17 of the Witwatersrand, South Africa  
18 6. Aga Khan University, Kenya  
19 7. International Centre for Reproductive Health (ICRH), Department of Obstetrics  
20 and Gynaecology, Ghent University, Belgium  
21 8. Judith Lumley Centre, La Trobe University, Australia  
22 9. University of San Francisco, USA

23  
24 \* these authors contributed equally to the manuscript.  
25

26 **Corresponding author:** Associate Professor Stanley Luchters

27 [Stanley.luchters@burnet.edu.au](mailto:Stanley.luchters@burnet.edu.au)  
28  
29  
30  
31



## Abstract

**Introduction:** New interventions are required to reduce unintended pregnancies among female sex workers (FSWs) in low- and middle-income countries, and to improve their nutritional health. Given sex workers' high mobile phone usage, repeated exposure to SMS messages could address individual and interpersonal barriers to contraceptive uptake and better nutrition.

**Methods:** In this two-arm cluster randomised trial, each arm constitutes an equal-attention control group for the other. SMS messages were developed systematically, participatory and theory-driven, and cover either sexual and reproductive health (WHISPER) or nutrition (SHOUT). Messages are sent to participants 2–3 times/week for 12 months, and include fact-based and motivational content as well as role model stories. Participants can send reply texts to obtain additional information. Sex work venues (clusters) in Mombasa, Kenya, were randomly sampled with a probability proportionate to venue size. Up to 10 women were recruited from each venue, to enrol 860 women. FSWs aged 16–35 years, who owned a mobile phone and were not pregnant at enrolment were eligible. Structured questionnaires, pregnancy tests, HIV and syphilis rapid tests, and full blood counts were performed at enrolment, with subsequent visits at six and 12 months.

**Analysis:** The primary outcomes of WHISPER and SHOUT are unintended pregnancy incidence and prevalence of anaemia at 12 months respectively. Each will be compared between study groups using discrete-time survival analysis.

**Potential limitations:** Contamination may occur if participants discuss their intervention with those in the other trial arm. This is mitigated by cluster recruitment and only sampling a small proportion of sex work venues from the sampling frame.

**Conclusions:** The design allows for the simultaneous testing of two independent mHealth interventions for which messaging frequency and study procedures are identical. This trial may guide future mHealth initiatives and provide methodological insights into use of reciprocal control groups.

**TRIAL REGISTRATION:** ACTRN12616000852459

## STRENGTHS AND LIMITATIONS OF TRIAL DESIGN

Strengths of the study include:

1. Use of a cluster-RCT with reciprocal controls allows for the simultaneous testing of two mHealth interventions, for which message frequency and study processes are identical; only the content of the messages differs.
2. Testing two independent hypotheses simultaneously is efficient, using considerably fewer resources than needed for two independent trials.
3. The design mitigates biases from unequal attention in trial groups (i.e., the groups have comparable interaction with the study team), positive expectations and non-blinding.

Important limitations of the study:

1. Contamination may occur if women receiving SRH messages share them or discuss their content with women in the nutrition arm, and vice versa. Contamination would diminish the ability to detect a difference in effectiveness between the two groups. Cluster-based intervention allocation has been used to reduce the potential for contamination between individuals; however, FSWs often work from multiple venues, so may come in contact with participants from other clusters. In addition, we have recruited only a small proportion of sex workers across a large geographic area (up to 106 of 760 hot spots, and 860 of an estimated 8,516 FSWs), which diminishes the chances of interaction between trial arms. Lastly, we will attempt to measure contamination by asking about message sharing in the questionnaire.
2. A further limitation of this design is that the outcomes of the interventions may interact. While the two health domains were chosen due to the minimal overlap between behaviours, there are some plausible points of influence between the arms. For example, higher rates of pregnancy in the nutrition arm may lower haemoglobin and iron levels in these women. More generally, those receiving messages on one aspect of health may improve their health behaviours across multiple health domains, potentially diluting the effect measures of the comparison between the study arms.
3. It is also important to note that the SRH intervention aims to increase demand for contraceptives, and that translating demand into raised coverage may be limited by deficiencies in the health system (supply-side issues). These could include commodity stock-outs, insufficient choice of methods offered to women, and discriminatory treatment of FSWs by health workers. Supply-side issues may also influence outcomes in the nutrition group, for example, if a limited range of foods is available in the household, or area more generally.

- 1  
2  
3 1 4. Although nutrition messages may alter knowledge and attitudes, women's  
4 2 socio-economic conditions may preclude a change in diet and thus in  
5 3 nutritional markers such as haemoglobin.  
6  
7 4 5. The use of both push and pull technologies is a novel and potentially  
8 5 powerful approach, but their simultaneous use may make it difficult to  
9 6 determine the size of their independent effects. We will perform a dose-  
10 7 response sub-analysis to examining whether differential exposure to  
11 8 messages (pull or push) is associated with the trial outcomes.  
12 9  
13  
14  
15

## 16 INTRODUCTION

### 17 *Female sex work*

18 Despite sex work being very common in sub-Saharan Africa, with one in 20 women  
19 estimated to have exchanged sex for money, goods or other favours,<sup>1</sup> it remains a  
20 highly stigmatised and mostly criminalised practice, including in Kenya.<sup>1,2</sup> The hostile  
21 politico-legal and social environment limits sex workers' access to health services,  
22 especially for sexual and reproductive health (SRH), and for preventing and treating  
23 HIV and other sexually transmitted infections (STIs).<sup>3</sup> Strategies such as providing  
24 peer education and outreach services are often unable to overcome the myriad  
25 structural, personal and financial challenges that female sex workers (FSWs) face.<sup>4</sup>  
26 This complex situation calls for new interventions that complement the current  
27 package of services and improve health and social outcomes for sex workers.  
28  
29  
30  
31  
32  
33  
34

### 35 *Unintended pregnancies among female sex workers*

36 In many low-income countries, increased provision of low-cost contraceptive  
37 methods has raised contraception coverage in the general population,<sup>5,6</sup> but such  
38 gains remain inequitably distributed within countries,<sup>7</sup> and they have not translated  
39 into improvements for FSWs.<sup>8</sup> This is due to a combination of *individual* barriers to  
40 uptake, such as side effects of some contraceptive methods that impact sex work,  
41 and myths and misconceptions about particular methods;<sup>9,10</sup> *interpersonal* barriers,  
42 including peer norms and pressure from partners not to use contraception;<sup>8</sup> and  
43 *structural* barriers, such as stigmatising treatment of FSWs in the health system.<sup>11,12</sup>  
44 Most programs established to improve the health of FSWs focus primarily on HIV  
45 and other STIs, and overlook FSWs' broader reproductive needs.<sup>8,13,14</sup> A systematic  
46 review of SRH projects aimed at FSWs in Africa found that few provided pregnancy  
47 testing or contraceptive services other than condoms, and few specifically promoted  
48 dual method use (the concurrent use of condoms and another effective  
49 contraceptive method).<sup>15</sup>  
50 Available data indicate that use of contraception other than condoms by FSWs in  
51 sub-Saharan Africa is variable, but generally low, ranging from around 15% to 50%.<sup>8</sup>  
52  
53  
54  
55  
56  
57  
58  
59  
60

16-18 Dual method use is rarely measured, but estimated at 10% in one study in Mombasa, Kenya.<sup>8</sup> The most popular modern method, injectable progestin,<sup>19</sup> is prone to discontinuation and contraceptive failure due to incorrect use.<sup>20 21</sup> In contrast, highly effective and low maintenance long-acting reversible contraceptives (LARCs; intrauterine devices and subdermal implants) are under-utilised, with only 7% of a sample of FSWs in Mombasa reporting ever using these methods.<sup>8</sup> While few studies have aimed specifically to measure unintended pregnancy among FSWs, HIV prevention studies among FSWs have reported unexpectedly high rates of pregnancy, with 12-month cumulative incidence of 24% in Kenya,<sup>8</sup> 23% in Madagascar,<sup>17</sup> 27% in Rwanda<sup>22</sup> and 23% in the Caribbean.<sup>23</sup> Unintended pregnancy exposes women to significant health and social risks, such as unsafe (and often illegal) abortion, high maternal and infant morbidity and mortality for those who continue with the pregnancy,<sup>24</sup> and increased financial dependence on sex work, which in turn increases their risk of HIV, other STIs, violence and repeat pregnancies.

### **Nutrition and nutritional status among female sex workers**

Urban food insecurity is a growing public health problem in sub-Saharan Africa, and disproportionately affects poor populations, who are more exposed to nutritional risks and have less capacity to adopt effective coping strategies.<sup>25</sup> Also, as a result of rapid urbanization in low- and middle-income countries – and associated changes in diet, leading to over-reliance on non-home prepared food that tends to be high in energy, sugar and salt, and low in nutrients – under-nutrition and micronutrient deficiencies are increasingly occurring alongside over-nutrition, overweight and obesity.<sup>25-27</sup> Both under-nutrition and over-nutrition are risk factors for poor health and mortality globally.<sup>28</sup> In women of reproductive age, micronutrient deficiency leads to pregnancy complications and greater child and maternal morbidity and mortality.<sup>29</sup> Anaemia, predominantly caused by iron deficiency, is endemic among women in sub-Saharan Africa; in Kenya, 36% of pregnant women and 25% of non-pregnant women are estimated to be anaemic.<sup>30</sup> While there are no published data on malnutrition among FSWs in Kenya, lack of physical activity, chaotic lifestyles and poor diet may lead to unhealthy weight gain, while at the same time contributing to their risk of micronutrient deficiency. Equally, food insecurity and hunger have been identified as key push factors for women to initiate and continue sex work.<sup>31 32</sup> In one study of sex workers in the Lagos metropolitan area in Nigeria, 35% of respondents had entered sex work in response to food insecurity.<sup>33</sup>

### **mHealth interventions**

Mobile phones have the potential to effectively engage FSWs, provide information, improve knowledge, and address individual and interpersonal barriers to contraception use and nutritional health. Mobile phone coverage is over 80% in

1 Kenya,<sup>34</sup> and close to ubiquitous among FSWs, who constitute a large mobile  
2 population that relies on mobile phones for maintaining social and business  
3 networks (unpublished formative research from Mombasa). mHealth interventions  
4 allow for repeated, theory-driven, user-centred and low-cost exposure, which is  
5 known to be important for securing behaviour change.<sup>35</sup>  
6 Several systematic reviews have shown that short messaging service (SMS)  
7 technology can influence health behaviour.<sup>36-39</sup> There are, however, few randomised  
8 controlled trials (RCTs) addressing SRH behaviour through SMS.<sup>40-42</sup> Two trials in  
9 Australia demonstrated improvements in health-seeking behaviour and sexual  
10 health outcomes, particularly among young women.<sup>41 42</sup> Non-randomised trials and  
11 program evaluations have also had positive findings.<sup>43 44</sup> With regards to nutrition,  
12 trials in the USA and Iran have demonstrated the efficacy of SMS for changing eating  
13 behaviours,<sup>45</sup> and knowledge and attitudes towards iodine consumption<sup>46</sup>  
14 respectively. SMS interventions targeting over-nutrition have also been tested,<sup>47-51</sup>  
15 some of which were associated with significant weight reduction.<sup>47-49</sup>  
16 Overall, research is failing to keep up with the rapid proliferation of mHealth  
17 interventions.<sup>38</sup> Despite the potential gains, there remains a lack of rigorous research  
18 on SRH promotion initiatives in LMICs,<sup>52</sup> and within the field of nutrition the lack of  
19 rigorous data is even more pronounced. Furthermore, among populations like FSWs  
20 from low-resource settings, who tend to have lower health knowledge and fewer  
21 resources for obtaining health information, intervention impact may be greater than  
22 that observed in high-income countries, but this has yet to be demonstrated  
23 empirically.

#### 24 ***WHISPER and SHOUT interventions***

25 The Women's Health Intervention using SMS for Preventing Unintended Pregnancy  
26 (WHISPER) study was developed in response to the substantial SRH needs of FSWs in  
27 Kenya, the potential benefits of increasing demand for family planning among FSWs  
28 through mHealth, and the research gaps in this field. If found to be effective,  
29 mHealth for SRH could complement and increase the effectiveness of the current  
30 service packages provided for sex workers.

31 Similarly, the need to improve nutrition for women in poor and vulnerable settings,  
32 and the paucity of data on FSWs' nutritional health, led to the development of the  
33 SMS intervention to improve nutritional Health OUTcomes (SHOUT). The SHOUT trial  
34 will provide important preliminary data on this under-investigated issue, and explore  
35 whether mHealth is an effective means of reducing malnutrition and anaemia in this  
36 population.

37 This paper presents the protocol for the WHISPER or SHOUT study. Recruitment and  
38 enrolment took place from September 2016 to May 2017, and 12-month data  
39 collection is anticipated to finish by June 2018.

## METHODS AND ANALYSIS

This is a two-arm cluster RCT, which will examine the effectiveness of parallel interventions, addressing SRH and nutrition, delivered via mobile phone among FSWs in Mombasa, Kenya. As each intervention addresses a unique set of specific issues, and the mode of delivery and level of exposure is the same, each trial arm serves as a control group for the other.<sup>53 54</sup>

### *Study objectives and outcomes*

The overall aim is to improve the health and wellbeing of FSWs in resource-constrained settings. Specifically, the study will assess the effectiveness of two independent 12-month mobile phone-delivered interventions in improving:

- i) SRH outcomes for FSWs receiving the WHISPER intervention, compared to women receiving a nutrition intervention; and
- ii) nutritional status for FSWs receiving the SHOUT intervention, compared to women receiving an SRH intervention.

The feasibility and acceptability of the interventions will also be assessed, using a combination of quantitative methods (structured questionnaires at six and 12 months) and qualitative methods (in-depth interviews at 12 months).

### **WHISPER**

The primary study outcome for WHISPER is the incidence of unintended pregnancy over 12 months of follow-up. Unintended pregnancy is defined as pregnancy that is mistimed, unplanned, or unwanted at the time of conception.<sup>55</sup> Women in the study are asked about their pregnancy intentions for the forthcoming six months at enrolment, and at the six and 12-month visits. A psychometrically-validated six-item questionnaire (London Measure of Unintended Pregnancy) will also be used to score pregnancy intention when pregnancy occurs during study follow-up.<sup>56</sup> Pregnancy events are defined as either a positive result on urine pregnancy screening at the six or 12-month visits (or at unscheduled visits at the study clinics, should these occur), or a self-reported pregnancy that occurs between study visits (captured by the follow-up questionnaire).

Secondary outcomes are being measured at baseline and six and 12 months, and include incidence of HIV and syphilis measured by point-of-care testing. Self-reported secondary outcomes, assessed by structured questionnaire, include SRH knowledge, behaviour (prevalence of LARC and dual method use) and service utilisation.

### **SHOUT**

The primary study outcome for SHOUT is the prevalence of anaemia at 12 months of follow-up. This outcome is measured using a certified laboratory-based haematology machine at baseline and 12 months, and is defined as haemoglobin level below

1 12.0g/dL, consistent with the World Health Organization (WHO) definition).<sup>30</sup> A  
2 point-of-care haemoglobinometer will also be used to enable immediate  
3 management of anaemia, but the laboratory measure will be used to calculate the  
4 primary outcome.  
5 Secondary outcomes include mean haemoglobin (Hb) levels at 12 months,  
6 prevalence of malnutrition (measured by body mass index and middle-upper arm  
7 circumference (MUAC) at baseline and six and 12 months), and self-reported  
8 nutritional knowledge and behaviour (assessed by structured questionnaire at  
9 baseline and six and 12 months).

## 10 **Study intervention**

### 11 **Development of WHISPER or SHOUT study interventions**

12 Changes in attitudes and behaviours are most likely to occur when communication  
13 interventions are theory-driven, interactive and follow best practice in design and  
14 implementation.<sup>57</sup> Furthermore, sustainable positive behaviour change among  
15 individuals and communities occurs as a process, supported by carefully designed  
16 interventions, and not as a single event.<sup>58 59</sup>  
17 The WHISPER and SHOUT interventions were therefore developed following a pre-  
18 defined protocol and in a systematic and participatory manner, ensuring that the  
19 intervention was grounded in evidence, was relevant and acceptable to the study  
20 population, and followed a logical process of behaviour change based on staged and  
21 social cognitive theoretical approaches.<sup>60</sup> An extensive review of the literature and  
22 consideration of health behaviour change theory informed the development of logic  
23 models for both study arms (figures 1 and 2), and the subsequent drafting of  
24 messages. Participatory and user-centred design and testing of the mobile phone  
25 intervention<sup>61-63</sup> was conducted with the target population in four informal  
26 consultative meetings, 12 formal workshops and 24 usability testing interviews.  
27 FSWs were involved in identifying important issues that affect them, developing  
28 messages and role model stories, reviewing and refining the content, and suggesting  
29 changes to the intervention architecture.

### 30 **Structure and delivery of the intervention**

31 Both the SRH and nutrition intervention consist of SMS (text) messages sent to  
32 participants two to three times per week for 12 months. The intervention includes  
33 the following components:

- 34 • 'push' texts covering the main content domains, providing simple  
35 information, motivational messages and strategies to prompt action;
- 36 • 'role model stories' about FSWs modelling healthy social norms and sent in  
37 4–5 instalments in one month (alternating months with stand-alone  
38 messages); and

- a 'pull' or on-demand menu that participants can access by texting into the system to obtain more information on high-priority topics and local services.

The intervention is being delivered by the VOTO mobile

(<https://www.votomobile.org/>) online platform. All messages are loaded onto the

system in a pre-determined order and sent automatically to each cluster of

participants at the scheduled time (calculated from each cluster's start date).

Participants are able to text assigned codes at any time during the study to access

the pull messages, with SMS costs incurred by the study (no charge for participants).

Content is only accessible to enrolled participants in the relevant intervention group,

so that those in the nutrition arm cannot directly access SRH messages, and vice

versa.

Table 1 presents a summary of the structure of the interventions, showing that they

are essentially equivalent in all structural components except the on-demand

system. This discrepancy is due to additional pull messages in WHISPER that provide

information about SRH services, allowing participants to link in with local sex worker-

sensitive providers. This was deemed important on ethical grounds given the

sensitive content of the WHISPER intervention, and because promotion of

contraception can only impact pregnancy rates if delivered alongside accessible

services that provide the methods in question. In contrast, the promotion of healthy

eating does not require an intermediate service utilisation step to result in improved

nutritional outcomes. Furthermore, low-cost or free nutrition services are not widely

available in Mombasa, and screening asymptomatic non-pregnant women for

anaemia is rarely practised, so we were unable to reliably list relevant services for

SHOUT.

**Table 1: Number, length and timing of messages for each study arm**

| Message type                                                    | Number of messages                                         | Length                                             | Timing                                                                                                |
|-----------------------------------------------------------------|------------------------------------------------------------|----------------------------------------------------|-------------------------------------------------------------------------------------------------------|
| Push messages                                                   | 82 (both arms)                                             | Up to 160 characters (1 SMS 'screen') <sup>1</sup> | 3 per week (Monday, Wednesday and Saturday mornings) during months 1, 3, 5, 7, 9, 11, 13 <sup>2</sup> |
| Interview reminders and study information (push messages)       | 7 (both arms)                                              | 160–480 characters (1–3 screens)                   | Months 6, 7, 13                                                                                       |
| Role model stories (push messages)                              | 26 (SRH); 27 (nutrition) (covering 6 stories for each arm) | 160–640 characters (1–4 screens) per message       | 2 per week (sent Monday and Friday mornings) during months 2, 4, 6, 8, 10, 12                         |
| 'Alerts': push messages linking participants to the pull system | 19 (SRH); 18 (nutrition)                                   | 160–320 characters (1–2 screens)                   |                                                                                                       |
| Pull (on-demand) messages                                       | 80 (SRH); 49 (nutrition)                                   | 160–640 characters (1–4 screens)                   | User determined                                                                                       |

<sup>1</sup> Messages are charged per 160 characters (1 screen). Messages longer than this will appear as one long SMS on most phones, but may be split into multiple messages on older phones.

<sup>2</sup> There are 13 blocks of four weeks each, making up 12 calendar months in total.



1  
2  
3 1  
4 2

### 3 **Setting and participants**

4 Eligible women were recruited from mapped sex work venues by well-established  
5 peer outreach workers. Sex work venues consist of fixed-site businesses including  
6 nightclubs, bars, brothels and hotels, as well as public spaces such as street corners  
7 and beaches, where sex is known to be bought and sold. The study is being  
8 conducted in two areas of Mombasa, a major economic centre in Kenya and East  
9 Africa, with busy port, rail and industrial enterprises. The local implementing  
10 partner, International Centre for Reproductive Health (ICRH; a WHO Collaborating  
11 Centre for Reproductive Health in Mombasa) has a research track record in the area  
12 dating back to 2002, including many trials and other prospective intervention studies  
13 with FSWs<sup>64-66</sup> and numerous non-interventional studies.<sup>67-70</sup>

### 14 **Inclusion and exclusion criteria**

15 To be eligible for participation, women had to: 1) be aged 16 to 35 years; 2) report  
16 having engaged in sex work (received money in exchange for sex) at the site of  
17 recruitment in the last six months; 3) not be pregnant or planning pregnancy within  
18 12 months; 4) reside, within the study area for the duration of the study; 5) have a  
19 personal mobile phone with Safaricom or Airtel subscription, and be willing to  
20 provide the phone number to the researchers to receive the intervention messages;  
21 6) report being SMS literate (i.e., able to read text messages in English); 7) be willing  
22 to return for follow-up after six and 12 months; 8) be willing to provide contact  
23 information (e.g. home address) to enable contact or a visit from a member of the  
24 research team in the community to remind them to attend follow-up visits; and 9) be  
25 able and willing to give written informed consent for enrolment in the study.  
26 Exclusion criteria included participation in another mHealth intervention study or in  
27 the formative research for this study, and having a medical or non-medical condition  
28 detected through screening that hinders study participation, as confirmed by the  
29 local Principal Investigator.

### 30 **Randomisation and sampling strategy**

31 ICRH and collaborators conducted a two-stage geographic mapping and  
32 enumeration exercise of FSWs in 2014, estimating that 11,777 (range 9,265–14,290)  
33 FSWs operate from 1053 venues across four sub-counties of Mombasa County.<sup>62</sup>  
34 We are recruiting FSW from two of these areas: Changamwe (where an estimated  
35 3,435 FSWs work from 285 venues) and Kisauni (where an estimated 5,081 FSWs  
36 work from 475 venues).<sup>62</sup>  
37 A two-stage sampling process was adopted, drawing on this sampling frame. At the  
38 first stage, FSW venues were selected with a probability proportionate to the  
39 enumerated size of the sex worker population at the venue, and randomised to

40  
41  
42  
43  
44  
45  
46  
47  
48  
49  
50  
51  
52  
53  
54  
55  
56  
57  
58  
59  
60 10

1 either the WHISPER or SHOUT arm. Each venue was considered to be a separate  
2 cluster. At the second stage, 10 FSWs were consecutively selected from each venue,  
3 based on an estimated mean cluster size of 11.<sup>62</sup> At venues where less than 10 FSWs  
4 were active, all FSWs from the selected venue were invited to participate in the  
5 study. Sampling of FSW venues continued until the required sample size was  
6 achieved.  
7 Cluster randomisation (allocation of each cluster to either WHISPER or SHOUT) was  
8 done centrally by the statistician and prior to recruitment commencing, involving an  
9 equal number of clusters in both arms. The participants and study team were  
10 blinded to allocation until after cluster enrolment was completed and all baseline  
11 questionnaires had been administered for that cluster.  
12 Overall, our approach aimed for optimal (as random as possible) sampling from the  
13 FSW population, while minimising the potential intervention dilution effects of  
14 message sharing that might occur with individual-level randomisation.

### 15 **Recruitment and enrolment**

16 Community mobilisers and peer educators employed by the study applied minimum  
17 pre-screening criteria at the site of recruitment to identify potential study  
18 participants. Potentially eligible women received a card with a unique, anonymous  
19 *referral card number* (made up of cluster number and sequential participant number  
20 for that cluster). They were asked to attend the nearest study clinic for full eligibility  
21 screening, consenting and enrolment within the next three days. The study clinics  
22 are open five days a week and are embedded in existing facilities: an ICRH-run sex-  
23 worker drop-in centre in Kisauni and a municipal community health centre in  
24 Changamwe. The number of sex workers approached and referral cards disbursed at  
25 each cluster was documented, as well as reasons for ineligibility at pre-screening.  
26 Volunteers had to bring their referral card number with them to undergo the  
27 screening process to ensure that only volunteers selected by the random sampling  
28 process were enrolled. Women who consented to participate and successfully  
29 completed full screening had their study identification number assigned and were  
30 then formally enrolled.

### 31 **Data collection**

32 Study visits were conducted at enrolment and will be repeated after six and 12  
33 months at the study clinics. All study staff, including clinicians, research assistants,  
34 community mobilisers and peer educators, were trained in the study procedures  
35 during a five-day workshop and undertake additional targeted sessions where  
36 required.  
37 Enrolment procedures include collecting informed consent, administering the  
38 baseline questionnaire, and performing clinical examination, urine pregnancy test,  
39 point-of-care blood tests for HIV, syphilis, and Hb level, and venepuncture for full

1 blood count (haemogram: Hb, haematocrit, mean cell volume and white blood  
2 count). Follow-up assessments are presented in Table 2.

3 **Table 2: Schedule of assessments for the WHISPER or SHOUT trial**

| Assessments                                                                       | Month 0 | Month 6 | Month 12 |
|-----------------------------------------------------------------------------------|---------|---------|----------|
| Structured questionnaire                                                          | ✓       | ✓       | ✓        |
| Clinical examination                                                              | ✓       | ✓       | ✓        |
| Urine pregnancy testing                                                           | ✓       | ✓       | ✓        |
| Point-of-care HIV and syphilis testing (including pre- and post-test counselling) | ✓       | ✓       | ✓        |
| Hb measured by haemoglobinometer                                                  | ✓       |         | ✓        |
| Full blood count                                                                  | ✓       |         | ✓        |
| In-depth interviews (subgroup of participants from SRH arm)                       |         |         | ✓        |

4  
5 Questionnaires were developed in English and translated into Swahili, and were  
6 based on previously validated measurement tools wherever possible. The  
7 questionnaire captures detailed socio-demographic information including education,  
8 literacy, employment, income, family and living circumstances, health and illness,  
9 and sex work history. SRH enquiries cover previous pregnancy(ies); six-month  
10 pregnancy intention; contraception and condom use (including dual protection);  
11 reasons for discontinuation or non-use of contraception; contraceptive self-efficacy;  
12 sexual and reproductive health seeking and service utilisation; sexual risk  
13 behaviours; SRH knowledge and attitudes; and relationship control and joint-  
14 decision-making with non-paying emotional partners. Participants are asked about  
15 whether they have recent STI-related symptoms, which are classified and treated as  
16 per syndromic STI guidelines.<sup>71</sup> Nutrition questions gather data on nutrition-related  
17 health seeking and service utilisation; food and hygiene-related knowledge and  
18 behaviours; dietary intake and preparation; and food purchasing.  
19 Clinical examination is performed by study clinicians, and includes STI syndromic  
20 management and anthropometric measurements to assess nutritional status (i.e.  
21 weight, height, waist circumference, hip circumference and MUAC).  
22 The results of rapid diagnostic tests are communicated to the participants at the  
23 time of the visit. Participants newly diagnosed with HIV are referred for treatment at  
24 specialised centres. Those with positive syphilis rapid test are treated with  
25 benzathine penicillin at the study visit. Participants with anaemia receive one month  
26 of iron and folic acid supplementation and a referral to a health facility for follow-up.  
27 Following enrolment, each participant was registered in the VOTO online platform.  
28 No identifying details apart from mobile phone number were entered. Intervention  
29 allocation was performed by data management staff independent of the study team,  
30 and occurred after enrolment was completed for each cluster. The intervention  
31 commenced simultaneously for all participants of one cluster in the week following  
32 completed cluster-level enrolment.

## 1 DATA ANALYSES

### 2 Analysis of primary endpoints

3 Primary analysis for WHISPER and SHOUT will compare the primary endpoints  
4 (unintended pregnancy incidence and anaemia prevalence respectively) between  
5 groups at 12 months. The data analysis team will be blinded to the allocation of  
6 participants. Given the interval-censored nature of unintended pregnancy incidence,  
7 discrete-time survival models using generalised linear modelling will be used to  
8 compare unintended pregnancy incidence between the two trial arms. Comparison  
9 of differences in prevalence of anaemia between study arms will be undertaken  
10 using multi-level generalised linear modelling.

11 These analyses will, where appropriate, provide estimates with robust standard  
12 errors for FSW venue clustering. Standardised probability weighting will be applied  
13 in population-averaged analyses to account for any sampling bias where achieved  
14 sample cluster sizes vary. Also, where randomisation is not effective in removing  
15 allocation bias, adjusted models will be specified. In all analyses, associations will be  
16 considered statistically significant at the 5% level.

### 17 Sample size

18 The sample size was calculated to obtain sufficient power to examine the effects of  
19 the SRH intervention. Based on a 12-month incidence of unintended pregnancy of  
20 24% in the control group (data from previous research in the study population),<sup>8</sup>  
21 enrolment of 860 participants from a minimum of 86 FSW venues would enable  
22 detection of a relative reduction in annual unintended pregnancy incidence of 37%  
23 (hazard risk=0.63), at 80% power and 5% significance level. This estimate was  
24 adjusted for an expected 10% attrition rate (based on previous experience with this  
25 population<sup>8</sup>) and an estimated inflation in standard error due to cluster  
26 randomisation (design effect=1.18; estimated intra-cluster correlation coefficient  
27 (ICC)=0.02, with a cluster size of 10).<sup>72</sup>

28 Sample size could not be reliably calculated for the SHOUT trial as estimates of  
29 anaemia in the local sex work population are not available. However, if we assume a  
30 prevalence of 25% (as per the national estimate for non-pregnant women<sup>30</sup>), the  
31 calculated sample size of 860 would allow for detection of an approximate 42%  
32 reduction in odds of anaemia prevalence, with inflation in standard error and  
33 attrition rate adjustments applied as above.

### 34 ETHICS AND DISSEMINATION

35 Written informed consent has been obtained from every study participant. Women  
36 aged 16 and 17 years are considered mature minors, and able to consent without  
37 involving parents and guardians, due to the sensitive nature of the subject matter.  
38 Informed consent forms are available in both Kiswahili and English, and describe the

1  
2  
3 1 purpose of the study, the procedures to be followed, and the risks and benefits of  
4 2 participation. Most importantly, we are aware of the risk that others seeing the  
5 3 messages may infer that the participant is a sex worker. It is important to mitigate  
6 4 this risk of unintentional disclosure of sex work status and consequent stigma or  
7 5 other adverse events for participants.<sup>73</sup> Participants have been counselled about the  
8 6 need for care to be taken to ensure that others do not have access to their phones.  
9 7 The study team also asks that participants report instances of unintentional  
10 8 disclosure. Such reporting allows us to provide support to the women concerned  
11 9 and, through understanding the events surrounding the case, try to find ways to  
12 10 avoid future occurrences.  
13 11 Ethical approvals have been obtained for protocol version 1.2, dated 22 August 2016  
14 12 from the Monash University Human Research Ethics Committee (MUHREC -  
15 13 CF16/1552 - 2016000812) and the Kenyatta National Hospital, University of Nairobi  
16 14 Ethics and Research Committee (KNH-UoN ERC – KNH-ERC/RR/493).  
17 15 Several dissemination activities are planned, including to health workers and the  
18 16 district office, Kenyan policymakers, at local and international conferences, and in  
19 17 academic publications.

### 18 ***Potential impact and significance***

19 19 The WHISPER study responds to the pressing need for effective and evidence-  
20 20 informed interventions to prevent unintended pregnancies among vulnerable  
21 21 women in resource-constrained settings. Persistent unmet need for family planning  
22 22 contributed to inadequate progress towards reducing child mortality and improving  
23 23 maternal health (Millennium Development Goals 4 and 5), and to the need for the  
24 24 2010 Global Strategy for Women's and Children's Health.<sup>7</sup> The ability to decide on  
25 25 the number and timing of children, free from coercion and violence, is a  
26 26 fundamental human right. During the 2012 London Summit on Family Planning,<sup>74</sup> the  
27 27 Kenyan Government committed to increasing funding and contraception coverage  
28 28 by 2015. Despite this supply-side commitment, questions remain about the optimum  
29 29 mechanism to increase demand, particularly among marginalised populations. The  
30 30 WHISPER trial will assess an innovative, sustainable and scalable approach to address  
31 31 some of these gaps.

32 32 Study outcomes will be used to inform future policies and public health  
33 33 interventions aimed at increasing uptake of family planning, as well as other SRH  
34 34 services, among vulnerable populations in a range of similar settings, particularly in  
35 35 LMICs. The rigorous research design and extensive local experience of our team will  
36 36 support advocacy and guide mobile technology services for health promotion as  
37 37 outlined in the 2010 Kenyan Government's Family Planning Guidelines.<sup>75</sup> If found to  
38 38 be effective, this intervention could be sustainably scaled up across East Africa.  
39 39 With regards to nutritional health, there are renewed efforts to design and  
40 40 implement action-oriented research, but the role of mHealth in these initiatives

1 remains uncertain.<sup>76</sup> The SHOUT study will go some way towards clarifying whether  
2 SMS technology is a useful way of responding to a long-recognised, but poorly  
3 characterised and neglected problem. Indeed, if shown to be effective in this trial,  
4 mHealth could be incorporated into broader nutrition strategies for FSWs in Africa  
5 and elsewhere, and has the potential to be scaled up for use with other women at a  
6 population level.

7 The design mitigates biases from unequal attention in trial groups, positive  
8 expectations and non-blinding.<sup>53 54</sup> The innovative approach described herein has  
9 never been used to prevent unintended pregnancies or improve nutrition among key  
10 risk populations in LMICs. A similar methodology in which the effects of SRH text  
11 messages were compared to a control SMS intervention was adopted in Australia  
12 with a sun safety control group,<sup>41</sup> and in the USA with a nutrition control group,<sup>44</sup>  
13 although the latter did not measure nutrition outcomes, unlike our trial. This trial  
14 will thus set standards for the mHealth field in LMICs, for both interventions and trial  
15 methodology. Lessons learnt about optimising SMS technology for both WHISPER  
16 and SHOUT could have considerable impact in Kenya, and similar countries, for a  
17 range of health priorities outside of those examined here.<sup>69</sup>

18 In conclusion, FSWs constitute a large, vulnerable, hard-to-reach population that  
19 could be amenable to mHealth interventions given their high mobile phone coverage  
20 and utilisation. FSWs are at considerable risk of unintended pregnancies, and could  
21 benefit markedly from interventions that increase uptake of contraception, with an  
22 emphasis on long-acting reversible technologies and dual method use. Similarly, the  
23 nutrition arm of the trial responds to the paucity of quality data on rates of  
24 malnutrition among sex workers and of effective interventions to improve their  
25 nutritional status and metabolic health.

26 A cluster RCT with an equal-attention control and objective biological primary  
27 endpoints (unintended pregnancy and anaemia) is the most robust study design to  
28 test the effectiveness of the planned interventions. It is anticipated that the trial will  
29 contribute important evidence to mHealth initiatives among vulnerable populations  
30 and provide useful methodological insights into the use of reciprocal control groups  
31 within such trials.

## 33 **Author declarations**

### 34 **Acknowledgements**

35 The authors gratefully acknowledge the contribution to this work of funding from  
36 the Victorian Operational Infrastructure Support Program received by the Burnet  
37 Institute.

### 39 **Author contributions**

1 The following authors were investigators on the trial from the outset: Frances Ampt,  
2 Collins Mudogo, Peter Gichangi, Megan Lim, Matthew Chersich, Walter Jaoko,  
3 Marleen Temmerman, Marilyn Laini, Liz Comrie-Thomson, Mark Stoové, Paul A.  
4 Agius, Margaret Hellard, Kelly L'Engle, Stanley Luchters. Griffins Manguro more  
5 recently joined the trial site in Kenya, leading work in that site. The paper draws  
6 from the trial protocol, which was written collectively, under the leadership of the  
7 Principal Investigator Stanley Luchters. All authors read and approved the final  
8 version of the paper.

### 9 **Funding**

10 Australia's National Health and Medical Research Council (NHMRC) provided funding  
11 for Project Grant GNT 1087006, Career Development Fellowships for S. Luchters and  
12 M. Stoové, and a Postgraduate Scholarship for F. Ampt. The sponsor did not have  
13 any contribution to the study design, data collection, management, analysis or  
14 interpretation.

### 15 **Competing Interests**

16 None declared

### 17 **Ethics approvals**

18 Monash University (MUHREC)  
19 Kenyatta National Hospital Ethics and research committee

### 20 **Provenance and peer review**

21 Not commissioned; externally peer reviewed

### 22 **Data sharing statement**

23 Data presented in this paper are available from the corresponding author on  
24 request.

### 25 **Figures**

26 Figure 1: Logic model for the sexual and reproductive health intervention (WHISPER)  
27 Figure 2: Logic model for the nutrition intervention (SHOUT)

### 28 **References**

- 29 1. Vandepitte J, Lyerla R, Dallabetta G, et al. Estimates of the number of female sex  
30 workers in different regions of the world. *Sexually transmitted infections*  
31 2006;82 Suppl 3:iii18-25.

- 1 2. Odek WO, Githuka GN, Avery L, et al. Estimating the size of the female sex worker  
2 population in Kenya to inform HIV prevention programming. *PloS one*  
3 2014;9(3):e89180.
- 4 3. The Global Fund. Key Populations Action Plan 2014-2017. Geneva: The Global  
5 Fund to Fight AIDS, Tuberculosis and Malaria, 2013.
- 6 4. Kerrigan D, Kennedy CE, Morgan-Thomas R, et al. A community empowerment  
7 approach to the HIV response among sex workers: effectiveness, challenges,  
8 and considerations for implementation and scale-up. *Lancet*  
9 2015;385(9963):172-85.
- 10 5. Kyalo J, Jurczynska K, Kundu F. ImpactNOW application in Kenya: Policy brief.  
11 Washington: Health Policy Project & National Council for Population and  
12 Development, 2015.
- 13 6. Ross J, Stover J. Use of modern contraception increases when more methods  
14 become available: analysis of evidence from 1982–2009. *Global Health:  
15 Science and Practice* 2013;1(2):203-12.
- 16 7. Temmerman M, Khosla R, Bhutta ZA, et al. Towards a new Global Strategy for  
17 Women's, Children's and Adolescents' Health. *BMJ : British Medical Journal*  
18 2015;351
- 19 8. Luchters S, Bosire W, Feng A, et al. "A baby was an added burden": predictors and  
20 consequences of unintended pregnancies for female sex workers in  
21 Mombasa, Kenya: a mixed-methods study. *PloS one* 2016;11(9):e0162871.  
22 [published Online First: 2016/10/01]
- 23 9. Khan MR, Turner AN, Pettifor A, et al. Unmet need for contraception among sex  
24 workers in Madagascar. *Contraception* 2009;79(3):221-7.
- 25 10. Sutherland EG, Alaii J, Tsui S, et al. Contraceptive needs of female sex workers in  
26 Kenya - a cross-sectional study. *European Journal of Contraception and  
27 Reproductive Health Care* 2011;16(3):173-82.
- 28 11. Scorgie F, Nakato D, Harper E, et al. 'We are despised in the hospitals': sex  
29 workers' experiences of accessing health care in four African countries.  
30 *Culture, Health and Sexuality* 2013;15(4):450-65.
- 31 12. Mannava P, Durrant K, Fisher J, et al. Attitudes and behaviours of maternal  
32 health care providers in interactions with clients: a systematic review. *Global  
33 Health* 2015;11:36.
- 34 13. Schwartz S, Papworth E, Thiam-Niangoin M, et al. An urgent need for integration  
35 of family planning services into HIV care: the high burden of unplanned  
36 pregnancy, termination of pregnancy, and limited contraception use among  
37 female sex workers in Cote d'Ivoire. *Journal of Acquired Immune Deficiency  
38 Syndromes* 2015;68:S91-S98.
- 39 14. Weldegebreal R, Melaku YA, Alemayehu M, et al. Unintended pregnancy among  
40 female sex workers in Mekelle city, northern Ethiopia: a cross-sectional  
41 study. *BMC Public Health* 2015;15:40.
- 42 15. Dhana A, Luchters S, Moore L, et al. Systematic review of facility-based sexual  
43 and reproductive health services for female sex workers in Africa.  
44 *Globalization and health* 2014;10(1):46-46.
- 45 16. Erickson M, Goldenberg SM, Ajok M, et al. Structural determinants of dual  
46 contraceptive use among female sex workers in Gulu, northern Uganda.  
47 *International Journal of Gynecology and Obstetrics* 2015;131(1):91-95.



- 1  
2  
3 17. Feldblum PJ, Nasution MD, Hoke TH, et al. Pregnancy among sex workers  
4 participating in a condom intervention trial highlights the need for dual  
5 protection. *Contraception* 2007;76(2):105-10.  
6  
7 18. McClelland RS, Richardson BA, Cherutich P, et al. A 15-year study of the impact of  
8 community antiretroviral therapy coverage on HIV incidence in Kenyan  
9 female sex workers. *AIDS* 2015;29(17):2279-86.  
10  
11 19. Darroch JE, Singh S. Trends in contraceptive need and use in developing  
12 countries in 2003, 2008, and 2012: an analysis of national surveys. *The Lancet*  
13 2013;381(9879):1756-62.  
14  
15 20. Baumgartner JN, Morroni C, Mlobeli RD, et al. Timeliness of contraceptive  
16 reinjections in South Africa and its relation to unintentional discontinuation.  
17 *International family planning perspectives* 2007;33(2):66-74. [published  
18 Online First: 2007/06/26]  
19  
20 21. Smit JA, Bekinska ME. Hormonal contraceptive continuation and switching in  
21 South Africa: implications for evaluating the association of injectable  
22 hormonal contraceptive use and HIV. *Journal of acquired immune deficiency*  
23 *syndromes (1999)* 2013;62(3):363-5. doi: 10.1097/QAI.0b013e31827e818a  
24 [published Online First: 2012/11/29]  
25  
26 22. Braunstein SL, Ingabire CM, Kestelyn E, et al. High human immunodeficiency  
27 virus incidence in a cohort of Rwandan female sex workers. *Sexually*  
28 *Transmitted Diseases* 2011;38(5):385-94.  
29  
30 23. Deschamps MM, Metch B, Morgan CA, et al. Feasibility of Identifying a Female  
31 Sex Worker Cohort at High Risk of HIV Infection in the Caribbean for HIV  
32 Vaccine Efficacy Trials: Longitudinal Results of HVTN 907. *Journal of Acquired*  
33 *Immune Deficiency Syndromes* 2016;71(1):70-77.  
34  
35 24. Singh S, Darroch JE, Ashford LS. Adding it up: The costs and benefits of investing  
36 in sexual and reproductive health 2014. New York: Guttmacher Institute,  
37 2014.  
38  
39 25. Kimani-Murage EW, Schofield L, Wekesah F, et al. Vulnerability to food insecurity  
40 in urban slums: experiences from Nairobi, Kenya. *J Urban Health*  
41 2014;91(6):1098-113.  
42  
43 26. van 't Riet H, den Hartog AP, Hoofman DA, et al. Determinants of non-home-  
44 prepared food consumption in two low-income areas in Nairobi. *Nutrition*  
45 2003;19(11-12):1006-12.  
46  
47 27. van't Riet H, den Hartog AP, van Staveren WA. Non-home prepared foods:  
48 contribution to energy and nutrient intake of consumers living in two low-  
49 income areas in Nairobi. *Public Health Nutr* 2002;5(4):515-22.  
50  
51 28. Oldewage-Theron WH, Kruger R, Egal AA. Socio-Economic Variables and Nutrient  
52 Adequacy of Women in the Vaal Region of South Africa. *Ecol Food Nutr*  
53 2014;53(5):514-27.  
54  
55 29. United Nations Children's Fund, United Nations University, World Health  
56 Organization. Iron deficiency anaemia, assessment, control and prevention: a  
57 guide for programme managers, 2010.  
58  
59 30. World Health Organization. The global prevalence of anaemia in 2011. Geneva:  
60 World Health Organization, 2015.

- 1  
2  
3 1 31. Fielding-Miller R, Mnisi Z, Adams D, et al. "There is hunger in my community": a  
4 2 qualitative study of food security as a cyclical force in sex work in Swaziland.  
5 3 *BMC Public Health* 2014;14:79.  
6 4  
7 4 32. Kunnuji M. Basic deprivation and involvement in risky sexual behaviour among  
8 5 out-of-school young people in a Lagos slum. *Cult Health Sex* 2014;16(7):727-  
9 6 40.  
10 7 33. Oyefara JL. Food insecurity, HIV/AIDS pandemic and sexual behaviour of female  
11 8 commercial sex workers in Lagos metropolis, Nigeria. *SAHARA J*  
12 9 2007;4(2):626-35.  
13 10 34. International Telecommunication Union. Information and Communication  
14 11 Technology (ICT) Statistics 2016 [Available from:  
15 12 <http://www.itu.int/en/ITU-D/Statistics/Pages/stat/default.aspx> accessed  
16 13 10 September 2016.  
17 14 35. Mwaikambo L, Speizer IS, Schurmann A, et al. What Works in Family Planning  
18 15 Interventions: A Systematic Review. *Studies in Family Planning* 2011;42(2):67-  
19 16 82.  
20 17 36. Cole-Lewis H, Kershaw T. Text messaging as a tool for behavior change in disease  
21 18 prevention and management. *Epidemiol Rev* 2010;32:56-69.  
22 19 37. Fjeldsoe BS, Marshall AL, Miller YD. Behavior change interventions delivered by  
23 20 mobile telephone short-message service. *Am J Prev Med* 2009;36(2):165-73.  
24 21 38. Free C, Phillips G, Watson L, et al. The effectiveness of mobile-health  
25 22 technologies to improve health care service delivery processes: a systematic  
26 23 review and meta-analysis. *PLoS Med* 2013;10(1):e1001363.  
27 24 39. Armanasco AA, Miller YD, Fjeldsoe BS, et al. Preventive health behavior change  
28 25 text message interventions: a meta-analysis. *American Journal of Preventive*  
29 26 *Medicine* 2017 (in press)  
30 27 40. Tsur L, Kozer E, Berkovitch M. The Effect of Drug Consultation Center Guidance  
31 28 on Contraceptive Use Among Women Using Isotretinoin: A Randomized,  
32 29 Controlled Study. *Journal of Women's Health* 2008;17(4):579-84.  
33 30 41. Gold J, Aitken CK, Dixon HG, et al. A randomised controlled trial using mobile  
34 31 advertising to promote safer sex and sun safety to young people. *Health Educ*  
35 32 *Res* 2011;26(5):782-94.  
36 33 42. Lim MS, Hocking JS, Aitken CK, et al. Impact of text and email messaging on the  
37 34 sexual health of young people: a randomised controlled trial. *Journal of*  
38 35 *epidemiology and community health* 2012;66(1):69-74.  
39 36 43. L'Engle KL, Vahdat HL, Ndakidemi E, et al. Evaluating feasibility, reach and  
40 37 potential impact of a text message family planning information service in  
41 38 Tanzania. *Contraception* 2013;87(2):251-6.  
42 39 44. Juzang I, Fortune T, Black S, et al. A pilot programme using mobile phones for HIV  
43 40 prevention. *Journal of Telemedicine and Telecare* 2011;17(3):150-53.  
44 41 45. Brown ON, O'Connor LE, Savaiano D. Mobile MyPlate: A Pilot Study Using Text  
45 42 Messaging to Provide Nutrition Education and Promote Better Dietary  
46 43 Choices in College Students. *Journal of American College Health*  
47 44 2014;62(5):320-27.  
48 45 46. Mehran L, Nazeri P, Delshad H, et al. Does a text messaging intervention improve  
49 46 knowledge, attitudes and practice regarding iodine deficiency and iodized  
50 47 salt consumption? *Public Health Nutrition* 2012;15(12):2320-25.

- 1  
2  
3 1 47. Haapala I, Barengo NC, Biggs S, et al. Weight loss by mobile phone: a 1-year  
4 2 effectiveness study. *Public Health Nutr* 2009;12(12):2382-91. [published  
5 3 Online First: 2009/03/28]  
6 4  
7 48. Lombard C, Deeks A, Jolley D, et al. A low intensity, community based lifestyle  
8 5 programme to prevent weight gain in women with young children: cluster  
9 6 randomised controlled trial. *BMJ* 2010;341  
10 7  
11 49. Joo NS, Kim BT. Mobile phone short message service messaging for behaviour  
12 8 modification in a community-based weight control programme in Korea. *J*  
13 9 *Telemed Telecare* 2007;13(8):416-20. [published Online First: 2007/12/15]  
14 10  
15 50. Patrick K, Raab F, Adams MA, et al. A Text Message–Based Intervention for  
16 11 Weight Loss: Randomized Controlled Trial. *Journal of Medical Internet*  
17 12 *Research* 2009;11(1):e1.  
18 13  
19 51. Shapiro JR, Bauer S, Hamer RM, et al. Use of Text Messaging for Monitoring  
20 14 Sugar-Sweetened Beverages, Physical Activity, and Screen Time in Children: A  
21 15 Pilot Study. *Journal of nutrition education and behavior* 2008;40(6):385-91.  
22 16  
23 52. Lim MS, Hocking JS, Hellard ME, et al. SMS STI: a review of the uses of mobile  
24 17 phone text messaging in sexual health. *Int J STD AIDS* 2008;19(5):287-90.  
25 18  
26 53. Hartinger SM, Lanata CF, Hattendorf J, et al. Improving household air, drinking  
27 19 water and hygiene in rural Peru: a community-randomized-controlled trial of  
28 20 an integrated environmental home-based intervention package to improve  
29 21 child health. *International journal of epidemiology* 2016 [published Online  
30 22 First: 2016/11/08]  
31 23  
32 54. Hartinger SM, Lanata CF, Hattendorf J, et al. Impact of a child stimulation  
33 24 intervention on early child development in rural Peru: a cluster randomised  
34 25 trial using a reciprocal control design. *Journal of epidemiology and*  
35 26 *community health* 2017;71(3):217-24.  
36 27  
37 55. US Centers for Disease Control and Prevention. Unintended Pregnancy  
38 28 Prevention 2015 [updated 22 January. Available from:  
39 29 <https://www.cdc.gov/reproductivehealth/unintendedpregnancy/>  
40 30 accessed December 22 2016.  
41 31  
42 56. Hall J, Barrett G, Mbwana N, et al. Understanding pregnancy planning in a low-  
43 32 income country setting: validation of the London measure of unplanned  
44 33 pregnancy in Malawi. *BMC Pregnancy Childbirth* 2013;13:200.  
45 34  
46 57. Noar SM, Palmgreen P, Chabot M, et al. A 10-year systematic review of HIV/AIDS  
47 35 mass communication campaigns: Have we made progress? *Journal of health*  
36 *communication* 2009;14(1):15-42.  
37  
38 58. WIC Programme. WIC programme nutrition education guidance, 2006.  
39  
40 59. California WIC Programme. How to evaluate a WIC Nutrition education Program,  
41 2002.  
42  
43 60. US Department of Health and Human Services. Making health communication  
44 41 programs work. Washington, DC: US Department of Health and Human  
45 42 Services 2004.  
46 43  
47 61. Zhang D, Adipat B. Challenges, Methodologies, and Issues in the Usability Testing  
48 44 of Mobile Applications. *International Journal of Human–Computer Interaction*  
49 45 2005;18(3):293-308.  
50 46  
51 62. Cheuk E, Becker M, Mishra S, et al. Understanding Female Sex Workers' Early HIV  
52 47 Risk and the Implications for HIV Epidemic Control (Transitions Study):  
53  
54  
55  
56  
57  
58  
59  
60

- 1 Mapping and Estimating the Population Size of Female Sex Workers in  
2 Mombasa, Kenya and Dnipropetrovsk, Ukraine. 24th Annual Canadian  
3 Conference on HIV/AIDS Research: *Can J Infect Dis Med Microbiol* 2015;78B.  
4  
5  
6  
7 63. Yardley L, Morrison L, Bradbury K, et al. The Person-Based Approach to  
8 Intervention Development: Application to Digital Health-Related Behavior  
9 Change Interventions. *J Med Internet Res* 2015;17(1):e30.  
10  
11 64. Luchters S, Chersich MF, Jao I, et al. Acceptability of the diaphragm in Mombasa  
12 Kenya: a 6-month prospective study. *Eur J Contracept Reprod Health Care*  
13 2007;12(4):345-53.  
14  
15 65. Thomsen SC, Ombidi W, Toroitich-Ruto C, et al. A prospective study assessing the  
16 effects of introducing the female condom in a sex worker population in  
17 Mombasa, Kenya. *Sexually transmitted infections* 2006;82(5):397-402.  
18  
19 66. L'Engle KL, Mwarogo P, Kingola N, et al. A randomized controlled trial of a brief  
20 intervention to reduce alcohol use among female sex workers in Mombasa,  
21 Kenya. *Journal of acquired immune deficiency syndromes (1999)*  
22 2014;67(4):446-53. [published Online First: 2014/09/10]  
23  
24 67. Chersich MF, Luchters S, Malonza IM, et al. Heavy episodic drinking among  
25 Kenyan female sex workers is associated with unsafe sex, sexual violence and  
26 sexually transmitted infections. *Int J STD AIDS* 2007;18(11):764-9.  
27  
28 68. Luchters S, Chersich MF, Rinyiru A, et al. Impact of five years of peer-mediated  
29 interventions on sexual behavior and sexually transmitted infections among  
30 female sex workers in Mombasa, Kenya. *BMC Public Health* 2008;8:143.  
31  
32 69. Luchters S, Richter ML, Bosire W, et al. The contribution of emotional partners to  
33 sexual risk taking and violence among female sex workers in Mombasa,  
34 Kenya: a cohort study. *PloS one* 2013;8(8):e68855. [published Online First:  
35 2013/08/21]  
36  
37 70. Pack AP, L'Engle K, Mwarogo P, et al. Intimate partner violence against female  
38 sex workers in Mombasa, Kenya. *Cult Health Sex* 2013  
39  
40 71. World Health Organization. Guidelines for the Management of Sexually  
41 Transmitted Infections 2004.  
42  
43 72. Cai Y, Shi R, Shen T, et al. A study of HIV/AIDS related knowledge, attitude and  
44 behaviors among female sex workers in Shanghai China. *BMC public health*  
45 2010;10:377.  
46  
47 73. Rodrigues R, Poongulali S, Balaji K, et al. 'The phone reminder is important, but  
48 will others get to know about my illness?' Patient perceptions of an mHealth  
49 antiretroviral treatment support intervention in the HIVIND trial in South  
50 India. *BMJ open* 2015;5(11):e007574. [published Online First: 2015/11/04]  
51  
52 74. Carr B, Gates MF, Mitchell A, et al. Giving women the power to plan their  
53 families. *Lancet* 2012;380:80-2. [published Online First: 2012/07/13]  
54  
55 75. Reproductive Health Division - Kenya. National Family Planning Guidelines for  
56 Service Providers, 2010.  
57  
58 76. Beratarrechea A, Moyano D, Irazola V, et al. mHealth interventions to counter  
59 noncommunicable diseases in developing countries: still an uncertain  
60 promise. *Cardiology clinics* 2017;35(1):13-30. [published Online First:  
2016/11/26]

1  
2  
3  
4  
5  
6  
7  
8  
9  
10  
11  
12  
13  
14  
15  
16  
17  
18  
19  
20  
21  
22  
23  
24  
25  
26  
27  
28  
29  
30  
31  
32  
33  
34  
35  
36  
37  
38  
39  
40  
41  
42  
43  
44  
45  
46  
47  
48  
49  
50  
51  
52  
53  
54  
55  
56  
57  
58  
59  
60

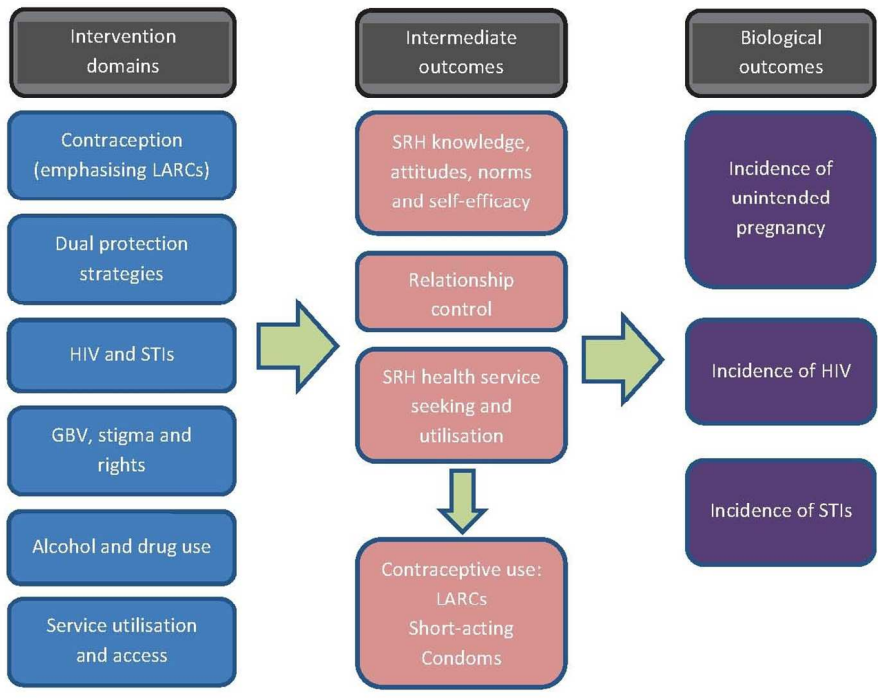

Figure 1. Logic model for the sexual and reproductive health intervention (WHISPER)

122x86mm (300 x 300 DPI)

ew only

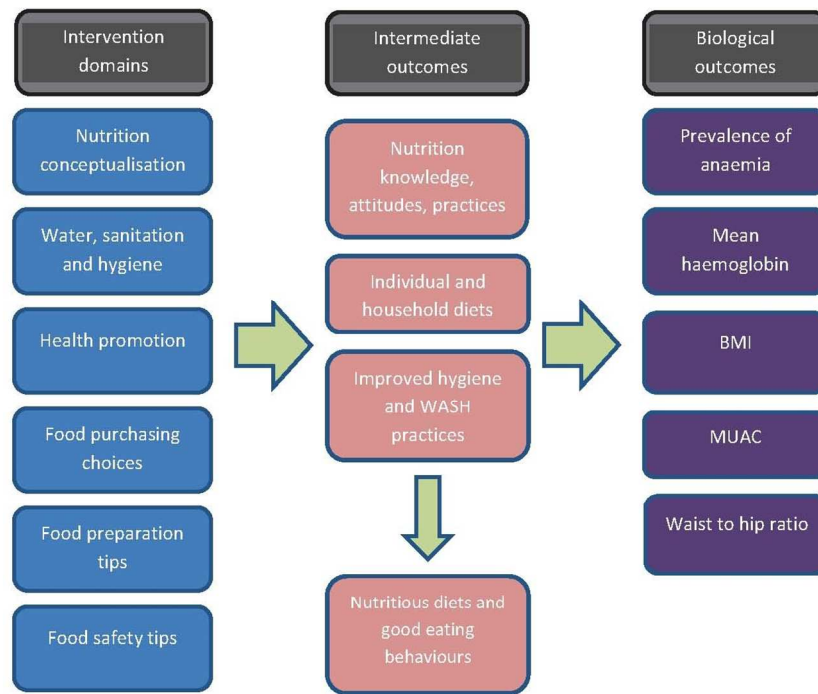

Figure 2. Logic model for the nutrition intervention (SHOUT)

127x90mm (300 x 300 DPI)

Review only



1  
2  
3  
4  
5  
6  
7  
8  
9  
10  
11  
12  
13  
14  
15  
16  
17  
18  
19  
20  
21  
22  
23  
24  
25  
26  
27  
28  
29  
30  
31  
32  
33  
34  
35  
36  
37  
38  
39  
40  
41  
42  
43  
44  
45  
46  
47  
48  
49

SPIRIT 2013 Checklist: Recommended items to address in a clinical trial protocol and related documents\*

| Section/item                      | Item No | Description                                                                                                                                                                                                                                                                              | Addressed on page number |
|-----------------------------------|---------|------------------------------------------------------------------------------------------------------------------------------------------------------------------------------------------------------------------------------------------------------------------------------------------|--------------------------|
| <b>Administrative information</b> |         |                                                                                                                                                                                                                                                                                          |                          |
| Title                             | 1       | Descriptive title identifying the study design, population, interventions, and, if applicable, trial acronym                                                                                                                                                                             | ___1___                  |
| Trial registration                | 2a      | Trial identifier and registry name. If not yet registered, name of intended registry                                                                                                                                                                                                     | ___2___                  |
|                                   | 2b      | All items from the World Health Organization Trial Registration Data Set                                                                                                                                                                                                                 | _____                    |
| Protocol version                  | 3       | Date and version identifier                                                                                                                                                                                                                                                              | ___14___                 |
| Funding                           | 4       | Sources and types of financial, material, and other support                                                                                                                                                                                                                              | ___16___                 |
| Roles and responsibilities        | 5a      | Names, affiliations, and roles of protocol contributors                                                                                                                                                                                                                                  | ___16___                 |
|                                   | 5b      | Name and contact information for the trial sponsor                                                                                                                                                                                                                                       | ___16___                 |
|                                   | 5c      | Role of study sponsor and funders, if any, in study design; collection, management, analysis, and interpretation of data; writing of the report; and the decision to submit the report for publication, including whether they will have ultimate authority over any of these activities | ___16___                 |
|                                   | 5d      | Composition, roles, and responsibilities of the coordinating centre, steering committee, endpoint adjudication committee, data management team, and other individuals or groups overseeing the trial, if applicable (see Item 21a for data monitoring committee)                         | ___N/A___                |

1  
2  
3 **Introduction**  
4

|                            |    |                                                                                                                                                                                                           |           |
|----------------------------|----|-----------------------------------------------------------------------------------------------------------------------------------------------------------------------------------------------------------|-----------|
| 5 Background and rationale | 6a | Description of research question and justification for undertaking the trial, including summary of relevant studies (published and unpublished) examining benefits and harms for each intervention        | ___4-6___ |
|                            | 6b | Explanation for choice of comparators                                                                                                                                                                     | ___3,6___ |
| 10 Objectives              | 7  | Specific objectives or hypotheses                                                                                                                                                                         | ___7___   |
| 12 Trial design            | 8  | Description of trial design including type of trial (eg, parallel group, crossover, factorial, single group), allocation ratio, and framework (eg, superiority, equivalence, noninferiority, exploratory) | ___7___   |

15  
16 **Methods: Participants, interventions, and outcomes**  
17

|                         |     |                                                                                                                                                                                                                                                                                                                                                                                |             |
|-------------------------|-----|--------------------------------------------------------------------------------------------------------------------------------------------------------------------------------------------------------------------------------------------------------------------------------------------------------------------------------------------------------------------------------|-------------|
| 18 Study setting        | 9   | Description of study settings (eg, community clinic, academic hospital) and list of countries where data will be collected. Reference to where list of study sites can be obtained                                                                                                                                                                                             | ___9,10___  |
| 21 Eligibility criteria | 10  | Inclusion and exclusion criteria for participants. If applicable, eligibility criteria for study centres and individuals who will perform the interventions (eg, surgeons, psychotherapists)                                                                                                                                                                                   | ___10___    |
| 24 Interventions        | 11a | Interventions for each group with sufficient detail to allow replication, including how and when they will be administered                                                                                                                                                                                                                                                     | ___8,9___   |
|                         | 11b | Criteria for discontinuing or modifying allocated interventions for a given trial participant (eg, drug dose change in response to harms, participant request, or improving/worsening disease)                                                                                                                                                                                 | ___N/A___   |
|                         | 11c | Strategies to improve adherence to intervention protocols, and any procedures for monitoring adherence (eg, drug tablet return, laboratory tests)                                                                                                                                                                                                                              | ___N/A___   |
|                         | 11d | Relevant concomitant care and interventions that are permitted or prohibited during the trial                                                                                                                                                                                                                                                                                  | ___N/A___   |
| 35 Outcomes             | 12  | Primary, secondary, and other outcomes, including the specific measurement variable (eg, systolic blood pressure), analysis metric (eg, change from baseline, final value, time to event), method of aggregation (eg, median, proportion), and time point for each outcome. Explanation of the clinical relevance of chosen efficacy and harm outcomes is strongly recommended | ___13___    |
| 41 Participant timeline | 13  | Time schedule of enrolment, interventions (including any run-ins and washouts), assessments, and visits for participants. A schematic diagram is highly recommended (see Figure)                                                                                                                                                                                               | ___10-12___ |



1  
2  
3  
4  
5  
6  
7  
8  
9  
10  
11  
12  
13  
14  
15  
16  
17  
18  
19  
20  
21  
22  
23  
24  
25  
26  
27  
28  
29  
30  
31  
32  
33  
34  
35  
36  
37  
38  
39  
40  
41  
42  
43  
44  
45  
46  
47  
48  
49

Sample size 14 Estimated number of participants needed to achieve study objectives and how it was determined, including clinical and statistical assumptions supporting any sample size calculations \_\_\_13\_\_\_

Recruitment 15 Strategies for achieving adequate participant enrolment to reach target sample size \_\_\_11\_\_\_

**Methods: Assignment of interventions (for controlled trials)**

Allocation:

Sequence generation 16a Method of generating the allocation sequence (eg, computer-generated random numbers), and list of any factors for stratification. To reduce predictability of a random sequence, details of any planned restriction (eg, blocking) should be provided in a separate document that is unavailable to those who enrol participants or assign interventions \_\_\_10-11\_\_\_

Allocation concealment mechanism 16b Mechanism of implementing the allocation sequence (eg, central telephone; sequentially numbered, opaque, sealed envelopes), describing any steps to conceal the sequence until interventions are assigned \_\_\_10-11\_\_\_

Implementation 16c Who will generate the allocation sequence, who will enrol participants, and who will assign participants to interventions \_\_\_11\_\_\_

Blinding (masking) 17a Who will be blinded after assignment to interventions (eg, trial participants, care providers, outcome assessors, data analysts), and how \_\_\_11\_\_\_

17b If blinded, circumstances under which unblinding is permissible, and procedure for revealing a participant's allocated intervention during the trial \_\_\_N/A\_\_\_

**Methods: Data collection, management, and analysis**

Data collection methods 18a Plans for assessment and collection of outcome, baseline, and other trial data, including any related processes to promote data quality (eg, duplicate measurements, training of assessors) and a description of study instruments (eg, questionnaires, laboratory tests) along with their reliability and validity, if known. Reference to where data collection forms can be found, if not in the protocol \_\_\_11-12\_\_\_

18b Plans to promote participant retention and complete follow-up, including list of any outcome data to be collected for participants who discontinue or deviate from intervention protocols \_\_\_N/A\_\_\_

|    |                                 |     |                                                                                                                                                                                                                                                                                                                                       |            |
|----|---------------------------------|-----|---------------------------------------------------------------------------------------------------------------------------------------------------------------------------------------------------------------------------------------------------------------------------------------------------------------------------------------|------------|
| 1  |                                 |     |                                                                                                                                                                                                                                                                                                                                       |            |
| 2  |                                 |     |                                                                                                                                                                                                                                                                                                                                       |            |
| 3  | Data management                 | 19  | Plans for data entry, coding, security, and storage, including any related processes to promote data quality (eg, double data entry; range checks for data values). Reference to where details of data management procedures can be found, if not in the protocol                                                                     | ___12, ___ |
| 4  |                                 |     |                                                                                                                                                                                                                                                                                                                                       |            |
| 5  |                                 |     |                                                                                                                                                                                                                                                                                                                                       |            |
| 6  |                                 |     |                                                                                                                                                                                                                                                                                                                                       |            |
| 7  | Statistical methods             | 20a | Statistical methods for analysing primary and secondary outcomes. Reference to where other details of the statistical analysis plan can be found, if not in the protocol                                                                                                                                                              | ___13___   |
| 8  |                                 |     |                                                                                                                                                                                                                                                                                                                                       |            |
| 9  |                                 |     |                                                                                                                                                                                                                                                                                                                                       |            |
| 10 |                                 | 20b | Methods for any additional analyses (eg, subgroup and adjusted analyses)                                                                                                                                                                                                                                                              | ___13___   |
| 11 |                                 |     |                                                                                                                                                                                                                                                                                                                                       |            |
| 12 |                                 | 20c | Definition of analysis population relating to protocol non-adherence (eg, as randomised analysis), and any statistical methods to handle missing data (eg, multiple imputation)                                                                                                                                                       | ___13___   |
| 13 |                                 |     |                                                                                                                                                                                                                                                                                                                                       |            |
| 14 |                                 |     |                                                                                                                                                                                                                                                                                                                                       |            |
| 15 |                                 |     |                                                                                                                                                                                                                                                                                                                                       |            |
| 16 | <b>Methods: Monitoring</b>      |     |                                                                                                                                                                                                                                                                                                                                       |            |
| 17 |                                 |     |                                                                                                                                                                                                                                                                                                                                       |            |
| 18 | Data monitoring                 | 21a | Composition of data monitoring committee (DMC); summary of its role and reporting structure; statement of whether it is independent from the sponsor and competing interests; and reference to where further details about its charter can be found, if not in the protocol. Alternatively, an explanation of why a DMC is not needed | ___N/A___  |
| 19 |                                 |     |                                                                                                                                                                                                                                                                                                                                       |            |
| 20 |                                 |     |                                                                                                                                                                                                                                                                                                                                       |            |
| 21 |                                 |     |                                                                                                                                                                                                                                                                                                                                       |            |
| 22 |                                 |     |                                                                                                                                                                                                                                                                                                                                       |            |
| 23 |                                 | 21b | Description of any interim analyses and stopping guidelines, including who will have access to these interim results and make the final decision to terminate the trial                                                                                                                                                               | ___N/A___  |
| 24 |                                 |     |                                                                                                                                                                                                                                                                                                                                       |            |
| 25 |                                 |     |                                                                                                                                                                                                                                                                                                                                       |            |
| 26 | Harms                           | 22  | Plans for collecting, assessing, reporting, and managing solicited and spontaneously reported adverse events and other unintended effects of trial interventions or trial conduct                                                                                                                                                     | ___13___   |
| 27 |                                 |     |                                                                                                                                                                                                                                                                                                                                       |            |
| 28 |                                 |     |                                                                                                                                                                                                                                                                                                                                       |            |
| 29 | Auditing                        | 23  | Frequency and procedures for auditing trial conduct, if any, and whether the process will be independent from investigators and the sponsor                                                                                                                                                                                           | ___N/A___  |
| 30 |                                 |     |                                                                                                                                                                                                                                                                                                                                       |            |
| 31 |                                 |     |                                                                                                                                                                                                                                                                                                                                       |            |
| 32 |                                 |     |                                                                                                                                                                                                                                                                                                                                       |            |
| 33 | <b>Ethics and dissemination</b> |     |                                                                                                                                                                                                                                                                                                                                       |            |
| 34 |                                 |     |                                                                                                                                                                                                                                                                                                                                       |            |
| 35 | Research ethics approval        | 24  | Plans for seeking research ethics committee/institutional review board (REC/IRB) approval                                                                                                                                                                                                                                             | ___14___   |
| 36 |                                 |     |                                                                                                                                                                                                                                                                                                                                       |            |
| 37 |                                 |     |                                                                                                                                                                                                                                                                                                                                       |            |
| 38 | Protocol amendments             | 25  | Plans for communicating important protocol modifications (eg, changes to eligibility criteria, outcomes, analyses) to relevant parties (eg, investigators, REC/IRBs, trial participants, trial registries, journals, regulators)                                                                                                      | ___N/A___  |
| 39 |                                 |     |                                                                                                                                                                                                                                                                                                                                       |            |
| 40 |                                 |     |                                                                                                                                                                                                                                                                                                                                       |            |
| 41 |                                 |     |                                                                                                                                                                                                                                                                                                                                       |            |
| 42 |                                 |     |                                                                                                                                                                                                                                                                                                                                       |            |
| 43 |                                 |     |                                                                                                                                                                                                                                                                                                                                       |            |
| 44 |                                 |     |                                                                                                                                                                                                                                                                                                                                       |            |
| 45 |                                 |     |                                                                                                                                                                                                                                                                                                                                       |            |
| 46 |                                 |     |                                                                                                                                                                                                                                                                                                                                       |            |
| 47 |                                 |     |                                                                                                                                                                                                                                                                                                                                       |            |
| 48 |                                 |     |                                                                                                                                                                                                                                                                                                                                       |            |
| 49 |                                 |     |                                                                                                                                                                                                                                                                                                                                       |            |

|    |                               |     |                                                                                                                                                                                                                                                                                     |               |
|----|-------------------------------|-----|-------------------------------------------------------------------------------------------------------------------------------------------------------------------------------------------------------------------------------------------------------------------------------------|---------------|
| 1  |                               |     |                                                                                                                                                                                                                                                                                     |               |
| 2  |                               |     |                                                                                                                                                                                                                                                                                     |               |
| 3  | Consent or assent             | 26a | Who will obtain informed consent or assent from potential trial participants or authorised surrogates, and how (see Item 32)                                                                                                                                                        | ___ 13 ___    |
| 4  |                               |     |                                                                                                                                                                                                                                                                                     |               |
| 5  |                               |     |                                                                                                                                                                                                                                                                                     |               |
| 6  |                               | 26b | Additional consent provisions for collection and use of participant data and biological specimens in ancillary studies, if applicable                                                                                                                                               | ___ 13 ___    |
| 7  |                               |     |                                                                                                                                                                                                                                                                                     |               |
| 8  |                               |     |                                                                                                                                                                                                                                                                                     |               |
| 9  | Confidentiality               | 27  | How personal information about potential and enrolled participants will be collected, shared, and maintained in order to protect confidentiality before, during, and after the trial                                                                                                | ___ 13-14 ___ |
| 10 |                               |     |                                                                                                                                                                                                                                                                                     |               |
| 11 |                               |     |                                                                                                                                                                                                                                                                                     |               |
| 12 | Declaration of interests      | 28  | Financial and other competing interests for principal investigators for the overall trial and each study site                                                                                                                                                                       | ___ 16 ___    |
| 13 |                               |     |                                                                                                                                                                                                                                                                                     |               |
| 14 |                               |     |                                                                                                                                                                                                                                                                                     |               |
| 15 | Access to data                | 29  | Statement of who will have access to the final trial dataset, and disclosure of contractual agreements that limit such access for investigators                                                                                                                                     | ___ 16 ___    |
| 16 |                               |     |                                                                                                                                                                                                                                                                                     |               |
| 17 |                               |     |                                                                                                                                                                                                                                                                                     |               |
| 18 | Ancillary and post-trial care | 30  | Provisions, if any, for ancillary and post-trial care, and for compensation to those who suffer harm from trial participation                                                                                                                                                       | ___ N/A ___   |
| 19 |                               |     |                                                                                                                                                                                                                                                                                     |               |
| 20 |                               |     |                                                                                                                                                                                                                                                                                     |               |
| 21 | Dissemination policy          | 31a | Plans for investigators and sponsor to communicate trial results to participants, healthcare professionals, the public, and other relevant groups (eg, via publication, reporting in results databases, or other data sharing arrangements), including any publication restrictions | ___ N/A ___   |
| 22 |                               |     |                                                                                                                                                                                                                                                                                     |               |
| 23 |                               |     |                                                                                                                                                                                                                                                                                     |               |
| 24 |                               |     |                                                                                                                                                                                                                                                                                     |               |
| 25 |                               |     |                                                                                                                                                                                                                                                                                     |               |
| 26 |                               | 31b | Authorship eligibility guidelines and any intended use of professional writers                                                                                                                                                                                                      | ___ N/A ___   |
| 27 |                               |     |                                                                                                                                                                                                                                                                                     |               |
| 28 |                               | 31c | Plans, if any, for granting public access to the full protocol, participant-level dataset, and statistical code                                                                                                                                                                     | ___ N/A ___   |
| 29 |                               |     |                                                                                                                                                                                                                                                                                     |               |
| 30 | <b>Appendices</b>             |     |                                                                                                                                                                                                                                                                                     |               |
| 31 |                               |     |                                                                                                                                                                                                                                                                                     |               |
| 32 | Informed consent materials    | 32  | Model consent form and other related documentation given to participants and authorised surrogates                                                                                                                                                                                  | ___ N/A ___   |
| 33 |                               |     |                                                                                                                                                                                                                                                                                     |               |
| 34 |                               |     |                                                                                                                                                                                                                                                                                     |               |
| 35 | Biological specimens          | 33  | Plans for collection, laboratory evaluation, and storage of biological specimens for genetic or molecular analysis in the current trial and for future use in ancillary studies, if applicable                                                                                      | ___ 11-12 ___ |
| 36 |                               |     |                                                                                                                                                                                                                                                                                     |               |
| 37 |                               |     |                                                                                                                                                                                                                                                                                     |               |

\*It is strongly recommended that this checklist be read in conjunction with the SPIRIT 2013 Explanation & Elaboration for important clarification on the items. Amendments to the protocol should be tracked and dated. The SPIRIT checklist is copyrighted by the SPIRIT Group under the Creative Commons "[Attribution-NonCommercial-NoDerivs 3.0 Unported](https://creativecommons.org/licenses/by-nc-nd/3.0/)" license.
